# Supplementary material for: Snow- and ice-ecosystem cleaning capability of the pucciniomycotinous yeast Phenoliferia psychrophenolica
Source: Research Square preprint supplement (doi:10.21203/rs.3.rs-5795686/v1), 2025-02-25
Supplement: Supplementary file 1 [file 45d53cd5222d521425530a6c.xlsx]

## Sheet:  
Krigeriales sp. P6C61 JGI locus IDs of highly similar duplicate (HSD) genes	Pfam domain	Functional annotation based on Pfam domains	Interpro domain	Functional annotation based on Interpro domains
jgi|Krisp1|113|CE112_627; jgi|Krisp1|259096|CE259095_2890; jgi|Krisp1|1252091|CE1252090_1892; jgi|Krisp1|1261625|CE1261624_4511	PF18721; PF18721; ;	CxC6 like cysteine cluster associated with KDZ transposases; CxC6 like cysteine cluster associated with KDZ transposases; ;	IPR040898; IPR040898; ;	CxC6 like cysteine cluster associated with KDZ; CxC6 like cysteine cluster associated with KDZ; ;
jgi|Krisp1|34256|CE34255_1514; jgi|Krisp1|2709287|gm4.383_g	PF00248; PF00248	Aldo/keto reductase family; Aldo/keto reductase family	IPR023210; IPR023210	NADP-dependent oxidoreductase domain; NADP-dependent oxidoreductase domain
jgi|Krisp1|82102|CE82101_3254; jgi|Krisp1|2023942|CE2023941_1716
jgi|Krisp1|128932|CE128931_2672; jgi|Krisp1|638305|CE638304_3504	PF03259; PF03259	Roadblock/LC7 domain; Roadblock/LC7 domain	IPR004942; IPR004942	Roadblock/LAMTOR2 domain; Roadblock/LAMTOR2 domain
jgi|Krisp1|134002|CE134001_4184; jgi|Krisp1|636509|CE636508_4020	PF01722; PF01722	BolA-like protein; BolA-like protein	IPR002634; IPR002634	BolA protein; BolA protein
jgi|Krisp1|136593|CE136592_10202; jgi|Krisp1|2640637|fgenesh1_kg.14_#_3468_#_TRINITY_DN3057_c0_g2_i2
jgi|Krisp1|139009|CE139008_1729; jgi|Krisp1|631648|CE631647_1708	PF00153; PF00153	Mitochondrial carrier protein; Mitochondrial carrier protein	IPR018108; IPR018108	Mitochondrial substrate/solute carrier; Mitochondrial substrate/solute carrier
jgi|Krisp1|236489|CE236488_751; jgi|Krisp1|238564|CE238563_553
jgi|Krisp1|236832|CE236831_141; jgi|Krisp1|238221|CE238220_137
jgi|Krisp1|261022|CE261021_155; jgi|Krisp1|1464643|CE1464642_1116
jgi|Krisp1|261832|CE261831_949; jgi|Krisp1|1465530|CE1465529_846	PF01156; PF01156	Inosine-uridine preferring nucleoside hydrolase; Inosine-uridine preferring nucleoside hydrolase	IPR001910; IPR001910	Inosine/uridine-preferring nucleoside hydrolase domain; Inosine/uridine-preferring nucleoside hydrolase domain
jgi|Krisp1|335096|CE335095_6879; jgi|Krisp1|2783962|estExt_fgenesh1_pg.C_3_t20094	PF00400; PF00400	WD domain, G-beta repeat; WD domain, G-beta repeat	IPR001680; IPR001680	WD40 repeat; WD40 repeat
jgi|Krisp1|335460|CE335459_6608; jgi|Krisp1|1388128|CE1388127_6820	PF00155; PF00155	Aminotransferase class I and II; Aminotransferase class I and II	IPR004839; IPR004839	Aminotransferase, class I/classII; Aminotransferase, class I/classII
jgi|Krisp1|339165|CE339164_1365; jgi|Krisp1|1381579|CE1381578_1364	PF00106; PF00106	short chain dehydrogenase; short chain dehydrogenase	IPR002347; IPR002347	Short-chain dehydrogenase/reductase SDR; Short-chain dehydrogenase/reductase SDR
jgi|Krisp1|2719062|gm4.10158_g; jgi|Krisp1|412401|CE412400_46087	PF01215; PF01215	Cytochrome c oxidase subunit Vb; Cytochrome c oxidase subunit Vb	IPR002124; IPR002124	Cytochrome c oxidase, subunit Vb; Cytochrome c oxidase, subunit Vb
jgi|Krisp1|523161|CE523160_9097; jgi|Krisp1|1259240|CE1259239_6570	PF14616; PF14616	Transcription regulator Rua1, C-terminal; Transcription regulator Rua1, C-terminal	IPR028012; IPR028012	Transcription regulator Rua1, C-terminal; Transcription regulator Rua1, C-terminal
jgi|Krisp1|526488|CE526487_916; jgi|Krisp1|2821445|MIX24150_44_100
jgi|Krisp1|1260142|CE1260141_591; jgi|Krisp1|2474722|e_gw1.6.1243.1; jgi|Krisp1|2530738|fgenesh1_kg.1_#_1925_#_TRINITY_DN2989_c1_g1_i11; jgi|Krisp1|2563253|fgenesh1_kg.3_#_6240_#_TRINITY_DN2989_c1_g1_i11; jgi|Krisp1|2563329|fgenesh1_kg.3_#_6316_#_TRINITY_DN2989_c1_g1_i11; jgi|Krisp1|2563349|fgenesh1_kg.3_#_6336_#_TRINITY_DN2989_c1_g1_i11; jgi|Krisp1|2563706|fgenesh1_kg.3_#_6693_#_TRINITY_DN2989_c…	PF15511; PF15511; PF15511; PF15511; PF15511; PF15511; PF15511; PF15511; PF15511; PF15511; PF15511; PF15511; PF15511; PF15511; PF15511; PF02969; PF15511	Centromere kinetochore component CENP-T histone fold; Centromere kinetochore component CENP-T histone fold; Centromere kinetochore component CENP-T histone fold; Centromere kinetochore component CENP-T histone fold; Centromere kinetochore component CENP-T histone fold; Centromere kinetochore component CENP-T histone fold; Centromere kinetochore component CENP-T histone fold; Centromere kinetochor…	IPR035425; IPR035425; IPR035425; IPR035425; IPR035425; IPR035425; IPR035425; IPR035425; IPR035425; IPR035425; IPR035425; IPR035425; IPR035425; IPR035425; IPR035425; IPR004823; IPR035425	CENP-T/Histone H4, histone fold; CENP-T/Histone H4, histone fold; CENP-T/Histone H4, histone fold; CENP-T/Histone H4, histone fold; CENP-T/Histone H4, histone fold; CENP-T/Histone H4, histone fold; CENP-T/Histone H4, histone fold; CENP-T/Histone H4, histone fold; CENP-T/Histone H4, histone fold; CENP-T/Histone H4, histone fold; CENP-T/Histone H4, histone fold; CENP-T/Histone H4, histone fold; CEN…
jgi|Krisp1|604897|CE604896_70918; jgi|Krisp1|658947|CE658946_81961	PF02800, PF00044; PF02800, PF00044	Glyceraldehyde 3-phosphate dehydrogenase, C-terminal domain, Glyceraldehyde 3-phosphate dehydrogenase, NAD binding domain; Glyceraldehyde 3-phosphate dehydrogenase, C-terminal domain, Glyceraldehyde 3-phosphate dehydrogenase, NAD binding domain	IPR020829, IPR020828; IPR020829, IPR020828	Glyceraldehyde 3-phosphate dehydrogenase, catalytic domain, Glyceraldehyde 3-phosphate dehydrogenase, NAD(P) binding domain; Glyceraldehyde 3-phosphate dehydrogenase, catalytic domain, Glyceraldehyde 3-phosphate dehydrogenase, NAD(P) binding domain
jgi|Krisp1|605410|CE605409_7666; jgi|Krisp1|657919|CE657918_8470	PF12929; PF12929	Stretch-activated Ca2+permeable channel component; Stretch-activated Ca2+permeable channel component	IPR024338; IPR024338	Stretch-activated cation channel Mid1/Calcium influx-promoting protein Ehs1; Stretch-activated cation channel Mid1/Calcium influx-promoting protein Ehs1
jgi|Krisp1|625094|CE625093_13281; jgi|Krisp1|2702509|estExt_Genewise1.C_15_t10499	PF00793; PF00793	DAHP synthetase I family; DAHP synthetase I family	IPR006218; IPR006218	DAHP synthetase I/KDSA; DAHP synthetase I/KDSA
jgi|Krisp1|625300|CE625299_4367; jgi|Krisp1|2727954|gm4.19050_g	PF01393; PF01393	Chromo shadow domain; Chromo shadow domain	IPR008251; IPR008251	Chromo shadow domain; Chromo shadow domain
jgi|Krisp1|626304|CE626303_117; jgi|Krisp1|2727945|gm4.19041_g
jgi|Krisp1|627015|CE627014_3084; jgi|Krisp1|681730|CE681729_3101
jgi|Krisp1|657607|CE657606_3724; jgi|Krisp1|2826099|MIX28804_1870_41	PF13489, PF11899; PF11899, PF13489	Methyltransferase domain, Protein of unknown function (DUF3419); Protein of unknown function (DUF3419), Methyltransferase domain	-, IPR021829; IPR021829, -	-, Protein of unknown function DUF3419; Protein of unknown function DUF3419, -
jgi|Krisp1|682835|CE682834_2693; jgi|Krisp1|2504368|estExt_Genewise1Plus.C_14_t10424	PF12998; PF12998	Inhibitor of growth proteins N-terminal histone-binding; Inhibitor of growth proteins N-terminal histone-binding	IPR024610; IPR024610	Inhibitor of growth protein, N-terminal histone-binding; Inhibitor of growth protein, N-terminal histone-binding
jgi|Krisp1|684899|CE684898_3971; jgi|Krisp1|1497091|CE1497090_3775	PF07690; PF07690	Major Facilitator Superfamily; Major Facilitator Superfamily	IPR011701; IPR011701	Major facilitator superfamily; Major facilitator superfamily
jgi|Krisp1|2733577|gm4.24673_g; jgi|Krisp1|685995|CE685994_1828
jgi|Krisp1|888183|CE888182_569; jgi|Krisp1|2583414|fgenesh1_kg.5_#_6442_#_TRINITY_DN3210_c0_g1_i25	PF02668; PF02668	Taurine catabolism dioxygenase TauD, TfdA family; Taurine catabolism dioxygenase TauD, TfdA family	IPR003819; IPR003819	TauD/TfdA-like domain; TauD/TfdA-like domain
jgi|Krisp1|888225|CE888224_5656; jgi|Krisp1|2583391|fgenesh1_kg.5_#_6419_#_TRINITY_DN5027_c0_g1_i23	PF00150, PF18564; PF00150, PF18564	Cellulase (glycosyl hydrolase family 5), Glycoside hydrolase family 5 C-terminal domain; Cellulase (glycosyl hydrolase family 5), Glycoside hydrolase family 5 C-terminal domain	IPR001547, IPR041036; IPR001547, IPR041036	Glycoside hydrolase, family 5, Glycoside hydrolase family 5, C-terminal domain; Glycoside hydrolase, family 5, Glycoside hydrolase family 5, C-terminal domain
jgi|Krisp1|889578|CE889577_7926; jgi|Krisp1|2583436|fgenesh1_kg.5_#_6464_#_TRINITY_DN160_c0_g1_i16; jgi|Krisp1|2570601|fgenesh1_kg.4_#_2598_#_TRINITY_DN160_c0_g1_i16	PF02301; PF02301; PF02301	HORMA domain; HORMA domain; HORMA domain	IPR003511; IPR003511; IPR003511	HORMA domain; HORMA domain; HORMA domain
jgi|Krisp1|901559|CE901558_967; jgi|Krisp1|2547432|fgenesh1_kg.2_#_1791_#_TRINITY_DN3820_c0_g1_i2
jgi|Krisp1|909919|CE909918_1518; jgi|Krisp1|2841320|MIX44025_2315_72
jgi|Krisp1|1034423|CE1034422_17660; jgi|Krisp1|1107421|CE1107420_10051; jgi|Krisp1|2660302|fgenesh1_kg.20_#_2109_#_TRINITY_DN1626_c0_g1_i4	PF21671; PF21671; PF21671	Protein CPL1-like; Protein CPL1-like; Protein CPL1-like	IPR048661; IPR048661; IPR048661	Protein CPL1-like; Protein CPL1-like; Protein CPL1-like
jgi|Krisp1|1053563|CE1053562_53133; jgi|Krisp1|2678955|fgenesh1_kg.33_#_484_#_TRINITY_DN996_c0_g1_i30	PF00106; PF00106	short chain dehydrogenase; short chain dehydrogenase	IPR002347; IPR002347	Short-chain dehydrogenase/reductase SDR; Short-chain dehydrogenase/reductase SDR
jgi|Krisp1|1117333|CE1117332_5478; jgi|Krisp1|1532396|CE1532395_5574	PF07690; PF07690	Major Facilitator Superfamily; Major Facilitator Superfamily	IPR011701; IPR011701	Major facilitator superfamily; Major facilitator superfamily
jgi|Krisp1|1120140|CE1120139_9418; jgi|Krisp1|2761927|fgenesh1_pm.4_#_20	PF00561; PF00561	alpha/beta hydrolase fold; alpha/beta hydrolase fold	IPR000073; IPR000073	Alpha/beta hydrolase fold-1; Alpha/beta hydrolase fold-1
jgi|Krisp1|1120644|CE1120643_3404; jgi|Krisp1|1124168|CE1124167_1159; jgi|Krisp1|2730679|gm4.21775_g; jgi|Krisp1|2715272|gm4.6368_g; jgi|Krisp1|2490822|estExt_Genewise1Plus.C_1_t40488; jgi|Krisp1|2531545|fgenesh1_kg.1_#_2732_#_TRINITY_DN5723_c0_g1_i5; jgi|Krisp1|2531560|fgenesh1_kg.1_#_2747_#_TRINITY_DN5723_c0_g1_i5; jgi|Krisp1|2597388|fgenesh1_kg.7_#_4252_#_TRINITY_DN5723_c0_g1_i5; jgi|Krisp1|25…	PF16211, PF00125; PF16211, PF00125; PF16211, PF00125; PF00125, PF16211; PF00125, PF16211; PF16211, PF00125; PF16211, PF00125; PF16211, PF00125; PF16211, PF00125; PF16211, PF00125; PF16211, PF00125; PF16211, PF00125	C-terminus of histone H2A, Core histone H2A/H2B/H3/H4; C-terminus of histone H2A, Core histone H2A/H2B/H3/H4; C-terminus of histone H2A, Core histone H2A/H2B/H3/H4; Core histone H2A/H2B/H3/H4, C-terminus of histone H2A; Core histone H2A/H2B/H3/H4, C-terminus of histone H2A; C-terminus of histone H2A, Core histone H2A/H2B/H3/H4; C-terminus of histone H2A, Core histone H2A/H2B/H3/H4; C-terminus of …	IPR032454, IPR007125; IPR032454, IPR007125; IPR032454, IPR007125; IPR007125, IPR032454; IPR007125, IPR032454; IPR032454, IPR007125; IPR032454, IPR007125; IPR032454, IPR007125; IPR032454, IPR007125; IPR032454, IPR007125; IPR032454, IPR007125; IPR032454, IPR007125	Histone H2A, C-terminal domain, Histone H2A/H2B/H3; Histone H2A, C-terminal domain, Histone H2A/H2B/H3; Histone H2A, C-terminal domain, Histone H2A/H2B/H3; Histone H2A/H2B/H3, Histone H2A, C-terminal domain; Histone H2A/H2B/H3, Histone H2A, C-terminal domain; Histone H2A, C-terminal domain, Histone H2A/H2B/H3; Histone H2A, C-terminal domain, Histone H2A/H2B/H3; Histone H2A, C-terminal domain, His…
jgi|Krisp1|1203734|CE1203733_2697; jgi|Krisp1|2756651|estExt_Genemark4.C_240037; jgi|Krisp1|1298398|CE1298397_2268; jgi|Krisp1|2675264|fgenesh1_kg.29_#_295_#_TRINITY_DN7946_c1_g1_i15	PF05063; PF05063; PF05063; PF05063	MT-A70; MT-A70; MT-A70; MT-A70	IPR007757; IPR007757; IPR007757; IPR007757	MT-A70-like; MT-A70-like; MT-A70-like; MT-A70-like
jgi|Krisp1|1359124|CE1359123_1521; jgi|Krisp1|2690452|estExt_Genewise1.C_3_t20092	PF00083; PF00083	Sugar (and other) transporter; Sugar (and other) transporter	IPR005828; IPR005828	Major facilitator, sugar transporter-like; Major facilitator, sugar transporter-like
jgi|Krisp1|1387298|CE1387297_3726; jgi|Krisp1|2723954|gm4.15050_g	PF13324; PF13324	Grap2 and cyclin-D-interacting, N-terminal; Grap2 and cyclin-D-interacting, N-terminal	IPR049317; IPR049317	Cyclin-D1-binding protein 1-like, N-terminal; Cyclin-D1-binding protein 1-like, N-terminal
jgi|Krisp1|1402900|CE1402899_2194; jgi|Krisp1|2572669|fgenesh1_kg.4_#_4666_#_TRINITY_DN1974_c0_g1_i31	PF00240; PF00240, PF01020	Ubiquitin family; Ubiquitin family, Ribosomal L40e family	IPR000626; IPR000626, IPR001975	Ubiquitin-like domain; Ubiquitin-like domain, Large ribosomal subunit protein eL40 domain
jgi|Krisp1|1482391|CE1482390_12634; jgi|Krisp1|1806947|CE1806946_13877	PF11051; PF11051	Mannosyltransferase putative; Mannosyltransferase putative	IPR022751; IPR022751	Alpha-mannosyltransferase; Alpha-mannosyltransferase
jgi|Krisp1|1511984|CE1511983_2903; jgi|Krisp1|2681022|fgenesh1_kg.38_#_232_#_TRINITY_DN4720_c0_g1_i6	PF00106; PF00106	short chain dehydrogenase; short chain dehydrogenase	IPR002347; IPR002347	Short-chain dehydrogenase/reductase SDR; Short-chain dehydrogenase/reductase SDR
jgi|Krisp1|1523559|CE1523558_4746; jgi|Krisp1|2870762|MIX73467_4170_96
jgi|Krisp1|1531599|CE1531598_3373; jgi|Krisp1|2768488|fgenesh1_pm.21_#_15	PF03061; PF03061	Thioesterase superfamily; Thioesterase superfamily	IPR006683; IPR006683	Thioesterase domain; Thioesterase domain
jgi|Krisp1|1581851|CE1581850_24335; jgi|Krisp1|2594524|fgenesh1_kg.7_#_1388_#_TRINITY_DN4396_c0_g1_i9	PF01184; PF01184	GPR1/FUN34/yaaH family; GPR1/FUN34/yaaH family	IPR000791; IPR000791	Acetate transporter GPR1/Ato2/SatP-like; Acetate transporter GPR1/Ato2/SatP-like
jgi|Krisp1|1588602|CE1588601_3530; jgi|Krisp1|2772798|estExt_fgenesh1_pm.C_4_t10359	PF00083; PF00083	Sugar (and other) transporter; Sugar (and other) transporter	IPR005828; IPR005828	Major facilitator, sugar transporter-like; Major facilitator, sugar transporter-like
jgi|Krisp1|1602569|CE1602568_879; jgi|Krisp1|2746390|estExt_Genemark4.C_8_t10192	PF01735; PF01735	Lysophospholipase catalytic domain; Lysophospholipase catalytic domain	IPR002642; IPR002642	Lysophospholipase, catalytic domain; Lysophospholipase, catalytic domain
jgi|Krisp1|1803673|CE1803672_70; jgi|Krisp1|2497096|estExt_Genewise1Plus.C_5_t30210
jgi|Krisp1|1816816|CE1816815_10306; jgi|Krisp1|2743675|estExt_Genemark4.C_6_t10003	PF07690; PF07690	Major Facilitator Superfamily; Major Facilitator Superfamily	IPR011701; IPR011701	Major facilitator superfamily; Major facilitator superfamily
jgi|Krisp1|1834514|CE1834513_5682; jgi|Krisp1|1837356|CE1837355_8949	PF02466; PF02466	Tim17/Tim22/Tim23/Pmp24 family; Tim17/Tim22/Tim23/Pmp24 family	-; -	-; -
jgi|Krisp1|1993577|CE1993576_3359; jgi|Krisp1|2770139|estExt_fgenesh1_pm.C_1_t10176; jgi|Krisp1|2780621|estExt_fgenesh1_pg.C_1_t10313; jgi|Krisp1|2661187|fgenesh1_kg.21_#_461_#_TRINITY_DN1780_c0_g1_i14; jgi|Krisp1|2568079|fgenesh1_kg.4_#_76_#_TRINITY_DN1780_c0_g1_i14; jgi|Krisp1|2661435|fgenesh1_kg.21_#_709_#_TRINITY_DN1780_c0_g1_i14; jgi|Krisp1|2661455|fgenesh1_kg.21_#_729_#_TRINITY_DN1780_c0_g1…	PF00125; PF00125; PF00125; PF00125; PF00125; PF00125; PF00125; PF00125; PF00125; PF00125; PF00125	Core histone H2A/H2B/H3/H4; Core histone H2A/H2B/H3/H4; Core histone H2A/H2B/H3/H4; Core histone H2A/H2B/H3/H4; Core histone H2A/H2B/H3/H4; Core histone H2A/H2B/H3/H4; Core histone H2A/H2B/H3/H4; Core histone H2A/H2B/H3/H4; Core histone H2A/H2B/H3/H4; Core histone H2A/H2B/H3/H4; Core histone H2A/H2B/H3/H4	IPR007125; IPR007125; IPR007125; IPR007125; IPR007125; IPR007125; IPR007125; IPR007125; IPR007125; IPR007125; IPR007125	Histone H2A/H2B/H3; Histone H2A/H2B/H3; Histone H2A/H2B/H3; Histone H2A/H2B/H3; Histone H2A/H2B/H3; Histone H2A/H2B/H3; Histone H2A/H2B/H3; Histone H2A/H2B/H3; Histone H2A/H2B/H3; Histone H2A/H2B/H3; Histone H2A/H2B/H3
jgi|Krisp1|1998937|CE1998936_563; jgi|Krisp1|2709415|gm4.511_g	; PF07250	; Glyoxal oxidase N-terminus	; IPR009880	; Glyoxal oxidase, N-terminal
jgi|Krisp1|2259322|CE2259321_137; jgi|Krisp1|2662949|fgenesh1_kg.21_#_2223_#_TRINITY_DN11328_c0_g1_i2
jgi|Krisp1|2466070|e_gw1.1.1672.1; jgi|Krisp1|2827293|MIX29998_6141_40	PF04488; PF04488	Glycosyltransferase sugar-binding region containing DXD motif; Glycosyltransferase sugar-binding region containing DXD motif	IPR007577; IPR007577	Glycosyltransferase, DXD sugar-binding motif; Glycosyltransferase, DXD sugar-binding motif
jgi|Krisp1|2466787|e_gw1.1.2926.1; jgi|Krisp1|2792255|estExt_fgenesh1_pg.C_13_t20064; jgi|Krisp1|2662300|fgenesh1_kg.21_#_1574_#_TRINITY_DN7387_c0_g1_i6; jgi|Krisp1|2569027|fgenesh1_kg.4_#_1024_#_TRINITY_DN7387_c0_g1_i2; jgi|Krisp1|2489981|estExt_Genewise1Plus.C_1_t30121; jgi|Krisp1|2660847|fgenesh1_kg.21_#_121_#_TRINITY_DN7387_c0_g1_i6	PF04828; PF04828; PF04828; PF04828; PF04828; PF04828	Glutathione-dependent formaldehyde-activating enzyme; Glutathione-dependent formaldehyde-activating enzyme; Glutathione-dependent formaldehyde-activating enzyme; Glutathione-dependent formaldehyde-activating enzyme; Glutathione-dependent formaldehyde-activating enzyme; Glutathione-dependent formaldehyde-activating enzyme	IPR006913; IPR006913; IPR006913; IPR006913; IPR006913; IPR006913	CENP-V/GFA domain; CENP-V/GFA domain; CENP-V/GFA domain; CENP-V/GFA domain; CENP-V/GFA domain; CENP-V/GFA domain
jgi|Krisp1|2467730|e_gw1.1.1629.1; jgi|Krisp1|2481665|e_gw1.14.8.1	PF01781; PF01781	Ribosomal L38e protein family; Ribosomal L38e protein family	IPR002675; IPR002675	Large ribosomal subunit protein eL38; Large ribosomal subunit protein eL38
jgi|Krisp1|2468587|e_gw1.2.785.1; jgi|Krisp1|2473207|e_gw1.5.972.1	PF10557, PF00888; PF00888, PF10557	Cullin protein neddylation domain, Cullin family; Cullin family, Cullin protein neddylation domain	IPR019559, IPR001373; IPR001373, IPR019559	Cullin protein, neddylation domain, Cullin, N-terminal; Cullin, N-terminal, Cullin protein, neddylation domain
jgi|Krisp1|2470269|e_gw1.3.1957.1; jgi|Krisp1|2737549|estExt_Genemark4.C_2_t10215	PF18325, PF01648, PF18314, PF00109, PF13452, PF02801, PF00698, PF17951, PF01575; PF00109, PF00698, PF02801, PF18325, PF18314, PF13452, PF01648, PF17951, PF01575	Fatty acid synthase subunit alpha Acyl carrier domain, 4'-phosphopantetheinyl transferase superfamily, Fatty acid synthase type I helical domain, Beta-ketoacyl synthase, N-terminal domain, N-terminal half of MaoC dehydratase, Beta-ketoacyl synthase, C-terminal domain, Acyl transferase domain, Fatty acid synthase meander beta sheet domain, MaoC like domain; Beta-ketoacyl synthase, N-terminal domai…	IPR040899, IPR008278, IPR041550, IPR014030, IPR039569, IPR014031, IPR014043, IPR040883, IPR002539; IPR014030, IPR014043, IPR014031, IPR040899, IPR041550, IPR039569, IPR008278, IPR040883, IPR002539	Fatty acid synthase subunit alpha, acyl carrier domain, 4'-phosphopantetheinyl transferase domain, Fatty acid synthase type I, helical, Beta-ketoacyl synthase, N-terminal, N-terminal of MaoC-like dehydratase, Beta-ketoacyl synthase, C-terminal, Acyl transferase, Fatty acid synthase, meander beta sheet domain, MaoC-like dehydratase domain; Beta-ketoacyl synthase, N-terminal, Acyl transferase, Beta…
jgi|Krisp1|2470579|e_gw1.3.171.1; jgi|Krisp1|2478753|e_gw1.10.70.1
jgi|Krisp1|2472304|e_gw1.4.2040.1; jgi|Krisp1|2778897|estExt_fgenesh1_pm.C_210039	PF13847; PF13847	Methyltransferase domain; Methyltransferase domain	IPR025714; IPR025714	Methyltransferase domain; Methyltransferase domain
jgi|Krisp1|2472656|e_gw1.4.1105.1; jgi|Krisp1|2485120|e_gw1.21.367.1	PF03169; PF03169	OPT oligopeptide transporter protein; OPT oligopeptide transporter protein	IPR004813; IPR004813	Oligopeptide transporter, OPT superfamily; Oligopeptide transporter, OPT superfamily
jgi|Krisp1|2473024|e_gw1.4.2147.1; jgi|Krisp1|2594289|fgenesh1_kg.7_#_1153_#_TRINITY_DN3963_c0_g1_i14	PF01687; PF01687	Riboflavin kinase; Riboflavin kinase	IPR015865; IPR015865	Riboflavin kinase domain, bacterial/eukaryotic; Riboflavin kinase domain, bacterial/eukaryotic
jgi|Krisp1|2481294|e_gw1.14.732.1; jgi|Krisp1|2642714|fgenesh1_kg.15_#_1605_#_TRINITY_DN3717_c0_g1_i6	PF00565; PF00565	Staphylococcal nuclease homologue; Staphylococcal nuclease homologue	IPR016071; IPR016071	Staphylococcal nuclease (SNase-like), OB-fold; Staphylococcal nuclease (SNase-like), OB-fold
jgi|Krisp1|2481412|e_gw1.14.394.1; jgi|Krisp1|2759829|fgenesh1_pm.1_#_452	PF02213; PF02213	GYF domain; GYF domain	IPR003169; IPR003169	GYF domain; GYF domain
jgi|Krisp1|2481572|e_gw1.14.535.1; jgi|Krisp1|2481902|e_gw1.15.279.1	PF00642, PF01480, PF00076; PF00076, PF00642, PF01480	Zinc finger C-x8-C-x5-C-x3-H type (and similar), PWI domain, RNA recognition motif; RNA recognition motif, Zinc finger C-x8-C-x5-C-x3-H type (and similar), PWI domain	IPR000571, IPR002483, IPR000504; IPR000504, IPR000571, IPR002483	Zinc finger, CCCH-type, PWI domain, RNA recognition motif domain; RNA recognition motif domain, Zinc finger, CCCH-type, PWI domain
jgi|Krisp1|2481683|e_gw1.14.684.1; jgi|Krisp1|2535992|fgenesh1_kg.1_#_7179_#_TRINITY_DN11033_c0_g1_i1	PF09351; PF09351	Domain of unknown function (DUF1993); Domain of unknown function (DUF1993)	IPR018531; IPR018531	Protein of unknown function DUF1993; Protein of unknown function DUF1993
jgi|Krisp1|2482256|e_gw1.15.676.1; jgi|Krisp1|2783374|estExt_fgenesh1_pg.C_2_t30262	PF00474; PF06609	Sodium:solute symporter family; Fungal trichothecene efflux pump (TRI12)	IPR001734; IPR010573	Sodium/solute symporter; Major facilitator transporter Str1/Tri12-like
jgi|Krisp1|2484952|e_gw1.21.369.1; jgi|Krisp1|2715330|gm4.6426_g
jgi|Krisp1|2485109|e_gw1.21.500.1; jgi|Krisp1|2571173|fgenesh1_kg.4_#_3170_#_TRINITY_DN8992_c2_g1_i5	PF00125; PF00125	Core histone H2A/H2B/H3/H4; Core histone H2A/H2B/H3/H4	IPR007125; IPR007125	Histone H2A/H2B/H3; Histone H2A/H2B/H3
jgi|Krisp1|2485171|e_gw1.21.108.1; jgi|Krisp1|2574399|fgenesh1_kg.4_#_6396_#_TRINITY_DN2374_c0_g1_i1	PF05221, PF00670; PF00670, PF05221	S-adenosyl-L-homocysteine hydrolase, S-adenosyl-L-homocysteine hydrolase, NAD binding domain; S-adenosyl-L-homocysteine hydrolase, NAD binding domain, S-adenosyl-L-homocysteine hydrolase	IPR000043, IPR015878; IPR015878, IPR000043	Adenosylhomocysteinase-like, S-adenosyl-L-homocysteine hydrolase, NAD binding domain; S-adenosyl-L-homocysteine hydrolase, NAD binding domain, Adenosylhomocysteinase-like
jgi|Krisp1|2485177|e_gw1.21.475.1; jgi|Krisp1|2715328|gm4.6424_g	PF02668; PF02668	Taurine catabolism dioxygenase TauD, TfdA family; Taurine catabolism dioxygenase TauD, TfdA family	IPR003819; IPR003819	TauD/TfdA-like domain; TauD/TfdA-like domain
jgi|Krisp1|2486221|e_gw1.24.325.1; jgi|Krisp1|2849313|MIX52018_2_31	PF00961; PF00961	LAGLIDADG endonuclease; LAGLIDADG endonuclease	IPR004860; IPR004860	Homing endonuclease, LAGLIDADG; Homing endonuclease, LAGLIDADG
jgi|Krisp1|2486884|e_gw1.27.70.1; jgi|Krisp1|2595801|fgenesh1_kg.7_#_2665_#_TRINITY_DN1203_c1_g1_i4	PF03171, PF14226; PF14226, PF03171	2OG-Fe(II) oxygenase superfamily, non-haem dioxygenase in morphine synthesis N-terminal; non-haem dioxygenase in morphine synthesis N-terminal, 2OG-Fe(II) oxygenase superfamily	IPR044861, IPR026992; IPR026992, IPR044861	Isopenicillin N synthase-like, Fe(2) 2OG dioxygenase domain, Non-haem dioxygenase N-terminal domain; Non-haem dioxygenase N-terminal domain, Isopenicillin N synthase-like, Fe(2) 2OG dioxygenase domain
jgi|Krisp1|2487878|e_gw1.33.10.1; jgi|Krisp1|2830616|MIX33321_6987_69	PF13193, PF00501; PF00501, PF13193	AMP-binding enzyme C-terminal domain, AMP-binding enzyme; AMP-binding enzyme, AMP-binding enzyme C-terminal domain	IPR025110, IPR000873; IPR000873, IPR025110	AMP-binding enzyme, C-terminal domain, AMP-dependent synthetase/ligase domain; AMP-dependent synthetase/ligase domain, AMP-binding enzyme, C-terminal domain
jgi|Krisp1|2489799|estExt_Genewise1Plus.C_1_t20439; jgi|Krisp1|2792647|estExt_fgenesh1_pg.C_140399	PF00580, PF13361; PF13361, PF00580	UvrD/REP helicase N-terminal domain, UvrD-like helicase C-terminal domain; UvrD-like helicase C-terminal domain, UvrD/REP helicase N-terminal domain	IPR014016, IPR014017; IPR014017, IPR014016	UvrD-like helicase, ATP-binding domain, UvrD-like DNA helicase, C-terminal; UvrD-like DNA helicase, C-terminal, UvrD-like helicase, ATP-binding domain
jgi|Krisp1|2489910|estExt_Genewise1Plus.C_1_t30050; jgi|Krisp1|2703976|estExt_Genewise1.C_190004
jgi|Krisp1|2492967|estExt_Genewise1Plus.C_3_t10439; jgi|Krisp1|2783546|estExt_fgenesh1_pg.C_3_t10171	PF00011; PF00011	Hsp20/alpha crystallin family; Hsp20/alpha crystallin family	IPR002068; IPR002068	Alpha crystallin/Hsp20 domain; Alpha crystallin/Hsp20 domain
jgi|Krisp1|2493756|estExt_Genewise1Plus.C_3_t30240; jgi|Krisp1|2504351|estExt_Genewise1Plus.C_14_t10407	PF01179, PF02727; PF02727, PF01179	Copper amine oxidase, enzyme domain, Copper amine oxidase, N2 domain; Copper amine oxidase, N2 domain, Copper amine oxidase, enzyme domain	IPR015798, IPR015800; IPR015800, IPR015798	Copper amine oxidase, catalytic domain, Copper amine oxidase, N2-terminal; Copper amine oxidase, N2-terminal, Copper amine oxidase, catalytic domain
jgi|Krisp1|2494182|estExt_Genewise1Plus.C_4_t10052; jgi|Krisp1|2705068|estExt_Genewise1.C_210101
jgi|Krisp1|2495175|estExt_Genewise1Plus.C_4_t30056; jgi|Krisp1|2841179|MIX43884_7323_55	PF03142; PF03142	Chitin synthase; Chitin synthase	-; -	-; -
jgi|Krisp1|2497525|estExt_Genewise1Plus.C_6_t10326; jgi|Krisp1|2726151|gm4.17247_g; jgi|Krisp1|2586826|fgenesh1_kg.6_#_1277_#_TRINITY_DN7139_c0_g1_i2	PF06093; PF06093; PF06093	Spt4/RpoE2 zinc finger; Spt4/RpoE2 zinc finger; Spt4/RpoE2 zinc finger	IPR022800; IPR022800; IPR022800	Spt4/RpoE2 zinc finger; Spt4/RpoE2 zinc finger; Spt4/RpoE2 zinc finger
jgi|Krisp1|2501295|estExt_Genewise1Plus.C_10_t10017; jgi|Krisp1|2691475|estExt_Genewise1.C_3_t40127	PF02417; PF02417	Chromate transporter; Chromate transporter	IPR003370; IPR003370	Chromate transporter; Chromate transporter
jgi|Krisp1|2502130|estExt_Genewise1Plus.C_10_t20357; jgi|Krisp1|2699541|estExt_Genewise1.C_10_t20367	PF00682; PF00682	HMGL-like; HMGL-like	IPR000891; IPR000891	Pyruvate carboxyltransferase; Pyruvate carboxyltransferase
jgi|Krisp1|2504370|estExt_Genewise1Plus.C_14_t10426; jgi|Krisp1|2702493|estExt_Genewise1.C_15_t10482	PF00069; PF00069	Protein kinase domain; Protein kinase domain	IPR000719; IPR000719	Protein kinase domain; Protein kinase domain
jgi|Krisp1|2504373|estExt_Genewise1Plus.C_14_t10429; jgi|Krisp1|2702491|estExt_Genewise1.C_15_t10480
jgi|Krisp1|2504382|estExt_Genewise1Plus.C_14_t10438; jgi|Krisp1|2505037|estExt_Genewise1Plus.C_15_t10469	PF01553; PF01553	Acyltransferase; Acyltransferase	IPR002123; IPR002123	Phospholipid/glycerol acyltransferase; Phospholipid/glycerol acyltransferase
jgi|Krisp1|2507548|estExt_Genewise1Plus.C_210051; jgi|Krisp1|2691578|estExt_Genewise1.C_4_t10096	PF01261; PF01261	Xylose isomerase-like TIM barrel; Xylose isomerase-like TIM barrel	IPR013022; IPR013022	Xylose isomerase-like, TIM barrel domain; Xylose isomerase-like, TIM barrel domain
jgi|Krisp1|2508804|estExt_Genewise1Plus.C_240211; jgi|Krisp1|2527052|fgenesh1_pg.24_#_131
jgi|Krisp1|2510499|estExt_Genewise1Plus.C_340069; jgi|Krisp1|2769994|estExt_fgenesh1_pm.C_1_t10030	PF05721; PF05721	Phytanoyl-CoA dioxygenase (PhyH); Phytanoyl-CoA dioxygenase (PhyH)	IPR008775; IPR008775	Phytanoyl-CoA dioxygenase-like; Phytanoyl-CoA dioxygenase-like
jgi|Krisp1|2511172|estExt_Genewise1Plus.C_770003; jgi|Krisp1|2680069|fgenesh1_kg.35_#_392_#_TRINITY_DN4664_c1_g1_i5	PF13391; PF13391	HNH endonuclease; HNH endonuclease	IPR003615; IPR003615	HNH nuclease; HNH nuclease
jgi|Krisp1|2512223|fgenesh1_pg.1_#_833; jgi|Krisp1|2727330|gm4.18426_g	PF01776; PF01776	Ribosomal L22e protein family; Ribosomal L22e protein family	IPR002671; IPR002671	Large ribosomal subunit protein eL22; Large ribosomal subunit protein eL22
jgi|Krisp1|2513111|fgenesh1_pg.1_#_1721; jgi|Krisp1|2609718|fgenesh1_kg.9_#_1260_#_TRINITY_DN444_c0_g1_i9
jgi|Krisp1|2513261|fgenesh1_pg.1_#_1871; jgi|Krisp1|2796056|estExt_fgenesh1_pg.C_270081	PF18717; PF18717	CxC4 like cysteine cluster associated with KDZ transposases; CxC4 like cysteine cluster associated with KDZ transposases	IPR040648; IPR040648	HMG domain-containing protein 3, CxC4 like cysteine cluster; HMG domain-containing protein 3, CxC4 like cysteine cluster
jgi|Krisp1|2515180|fgenesh1_pg.3_#_649; jgi|Krisp1|2515249|fgenesh1_pg.3_#_718; jgi|Krisp1|2530737|fgenesh1_kg.1_#_1924_#_TRINITY_DN723_c0_g1_i5; jgi|Krisp1|2761582|fgenesh1_pm.3_#_339; jgi|Krisp1|2590112|fgenesh1_kg.6_#_4563_#_TRINITY_DN723_c0_g1_i5; jgi|Krisp1|2590245|fgenesh1_kg.6_#_4696_#_TRINITY_DN723_c0_g1_i5; jgi|Krisp1|2743918|estExt_Genemark4.C_6_t10258; jgi|Krisp1|2763493|fgenesh1_pm.6_…	PF00125; PF00125; PF00125; PF00125; PF00125; PF00125; PF00125; PF00125; PF00125; PF00125; PF00125; PF00125; PF00125; PF00125	Core histone H2A/H2B/H3/H4; Core histone H2A/H2B/H3/H4; Core histone H2A/H2B/H3/H4; Core histone H2A/H2B/H3/H4; Core histone H2A/H2B/H3/H4; Core histone H2A/H2B/H3/H4; Core histone H2A/H2B/H3/H4; Core histone H2A/H2B/H3/H4; Core histone H2A/H2B/H3/H4; Core histone H2A/H2B/H3/H4; Core histone H2A/H2B/H3/H4; Core histone H2A/H2B/H3/H4; Core histone H2A/H2B/H3/H4; Core histone H2A/H2B/H3/H4	IPR007125; IPR007125; IPR007125; IPR007125; IPR007125; IPR007125; IPR007125; IPR007125; IPR007125; IPR007125; IPR007125; IPR007125; IPR007125; IPR007125	Histone H2A/H2B/H3; Histone H2A/H2B/H3; Histone H2A/H2B/H3; Histone H2A/H2B/H3; Histone H2A/H2B/H3; Histone H2A/H2B/H3; Histone H2A/H2B/H3; Histone H2A/H2B/H3; Histone H2A/H2B/H3; Histone H2A/H2B/H3; Histone H2A/H2B/H3; Histone H2A/H2B/H3; Histone H2A/H2B/H3; Histone H2A/H2B/H3
jgi|Krisp1|2520140|fgenesh1_pg.8_#_631; jgi|Krisp1|2520152|fgenesh1_pg.8_#_643	PF13561; PF00106	Enoyl-(Acyl carrier protein) reductase; short chain dehydrogenase	-; IPR002347	-; Short-chain dehydrogenase/reductase SDR
jgi|Krisp1|2522661|fgenesh1_pg.12_#_152; jgi|Krisp1|2792688|estExt_fgenesh1_pg.C_150020	PF18717; PF18717	CxC4 like cysteine cluster associated with KDZ transposases; CxC4 like cysteine cluster associated with KDZ transposases	IPR040648; IPR040648	HMG domain-containing protein 3, CxC4 like cysteine cluster; HMG domain-containing protein 3, CxC4 like cysteine cluster
jgi|Krisp1|2530397|fgenesh1_kg.1_#_1584_#_TRINITY_DN106_c2_g1_i56; jgi|Krisp1|2682168|fgenesh1_kg.44_#_63_#_TRINITY_DN106_c2_g1_i57	PF10557, PF00888; PF10557, PF00888	Cullin protein neddylation domain, Cullin family; Cullin protein neddylation domain, Cullin family	IPR019559, IPR001373; IPR019559, IPR001373	Cullin protein, neddylation domain, Cullin, N-terminal; Cullin protein, neddylation domain, Cullin, N-terminal
jgi|Krisp1|2530402|fgenesh1_kg.1_#_1589_#_TRINITY_DN106_c0_g1_i3; jgi|Krisp1|2682175|fgenesh1_kg.44_#_70_#_TRINITY_DN106_c0_g1_i3	PF01267; PF01267	F-actin capping protein alpha subunit; F-actin capping protein alpha subunit	IPR002189; IPR002189	F-actin-capping protein subunit alpha; F-actin-capping protein subunit alpha
jgi|Krisp1|2531290|fgenesh1_kg.1_#_2477_#_TRINITY_DN560_c0_g1_i22; jgi|Krisp1|2531383|fgenesh1_kg.1_#_2570_#_TRINITY_DN560_c0_g1_i19	PF06087; PF06087	Tyrosyl-DNA phosphodiesterase; Tyrosyl-DNA phosphodiesterase	IPR010347; IPR010347	Tyrosyl-DNA phosphodiesterase I; Tyrosyl-DNA phosphodiesterase I
jgi|Krisp1|2531308|fgenesh1_kg.1_#_2495_#_TRINITY_DN620_c0_g1_i35; jgi|Krisp1|2780579|estExt_fgenesh1_pg.C_1_t10271	PF02798, PF00043; PF00043, PF02798	Glutathione S-transferase, N-terminal domain, Glutathione S-transferase, C-terminal domain; Glutathione S-transferase, C-terminal domain, Glutathione S-transferase, N-terminal domain	IPR004045, IPR004046; IPR004046, IPR004045	Glutathione S-transferase, N-terminal, Glutathione S-transferase, C-terminal; Glutathione S-transferase, C-terminal, Glutathione S-transferase, N-terminal
jgi|Krisp1|2531358|fgenesh1_kg.1_#_2545_#_TRINITY_DN583_c0_g2_i8; jgi|Krisp1|2541631|fgenesh1_kg.1_#_12818_#_TRINITY_DN583_c0_g1_i1	PF00701; PF00701	Dihydrodipicolinate synthetase family; Dihydrodipicolinate synthetase family	IPR002220; IPR002220	DapA-like; DapA-like
jgi|Krisp1|2532332|fgenesh1_kg.1_#_3519_#_TRINITY_DN6039_c0_g1_i22; jgi|Krisp1|2532431|fgenesh1_kg.1_#_3618_#_TRINITY_DN6039_c0_g1_i12; jgi|Krisp1|2598208|fgenesh1_kg.7_#_5072_#_TRINITY_DN6039_c0_g1_i11; jgi|Krisp1|2720323|gm4.11419_g	PF08423; PF08423; PF08423; PF08423	Rad51; Rad51; Rad51; Rad51	IPR013632; IPR013632; IPR013632; IPR013632	DNA recombination and repair protein Rad51-like, C-terminal; DNA recombination and repair protein Rad51-like, C-terminal; DNA recombination and repair protein Rad51-like, C-terminal; DNA recombination and repair protein Rad51-like, C-terminal
jgi|Krisp1|2532938|fgenesh1_kg.1_#_4125_#_TRINITY_DN2212_c0_g1_i24; jgi|Krisp1|2593121|fgenesh1_kg.6_#_7572_#_TRINITY_DN2212_c0_g1_i24	PF07985; PF07985	SRR1 domain; SRR1 domain	IPR012942; IPR012942	SRR1-like domain; SRR1-like domain
jgi|Krisp1|2533786|fgenesh1_kg.1_#_4973_#_TRINITY_DN8501_c1_g1_i4; jgi|Krisp1|2533819|fgenesh1_kg.1_#_5006_#_TRINITY_DN8501_c1_g1_i3; jgi|Krisp1|2599549|fgenesh1_kg.7_#_6413_#_TRINITY_DN8501_c1_g1_i4; jgi|Krisp1|2599581|fgenesh1_kg.7_#_6445_#_TRINITY_DN8501_c1_g1_i4
jgi|Krisp1|2534050|fgenesh1_kg.1_#_5237_#_TRINITY_DN109_c0_g1_i19; jgi|Krisp1|2709764|gm4.860_g	PF00083; PF00083	Sugar (and other) transporter; Sugar (and other) transporter	IPR005828; IPR005828	Major facilitator, sugar transporter-like; Major facilitator, sugar transporter-like
jgi|Krisp1|2534775|fgenesh1_kg.1_#_5962_#_TRINITY_DN938_c0_g1_i25; jgi|Krisp1|2534804|fgenesh1_kg.1_#_5991_#_TRINITY_DN938_c0_g1_i25	PF20434; PF20434	BD-FAE; BD-FAE	IPR049492; IPR049492	BD-FAE-like domain; BD-FAE-like domain
jgi|Krisp1|2535048|fgenesh1_kg.1_#_6235_#_TRINITY_DN7351_c0_g1_i2; jgi|Krisp1|2535129|fgenesh1_kg.1_#_6316_#_TRINITY_DN1654_c0_g1_i1	PF05721; PF05721	Phytanoyl-CoA dioxygenase (PhyH); Phytanoyl-CoA dioxygenase (PhyH)	IPR008775; IPR008775	Phytanoyl-CoA dioxygenase-like; Phytanoyl-CoA dioxygenase-like
jgi|Krisp1|2535124|fgenesh1_kg.1_#_6311_#_TRINITY_DN5574_c0_g1_i28; jgi|Krisp1|2600761|fgenesh1_kg.7_#_7625_#_TRINITY_DN5574_c0_g1_i4
jgi|Krisp1|2535681|fgenesh1_kg.1_#_6868_#_TRINITY_DN10121_c0_g1_i20; jgi|Krisp1|2640912|fgenesh1_kg.14_#_3743_#_TRINITY_DN10121_c0_g1_i2	PF00852; PF00852	Glycosyltransferase family 10 (fucosyltransferase) C-term; Glycosyltransferase family 10 (fucosyltransferase) C-term	IPR001503; IPR001503	Glycosyl transferase family 10; Glycosyl transferase family 10
jgi|Krisp1|2535713|fgenesh1_kg.1_#_6900_#_TRINITY_DN14626_c0_g1_i24; jgi|Krisp1|2640944|fgenesh1_kg.14_#_3775_#_TRINITY_DN14626_c0_g1_i24	PF07690; PF07690	Major Facilitator Superfamily; Major Facilitator Superfamily	IPR011701; IPR011701	Major facilitator superfamily; Major facilitator superfamily
jgi|Krisp1|2535741|fgenesh1_kg.1_#_6928_#_TRINITY_DN2343_c0_g1_i1; jgi|Krisp1|2640973|fgenesh1_kg.14_#_3804_#_TRINITY_DN2343_c0_g1_i1
jgi|Krisp1|2535749|fgenesh1_kg.1_#_6936_#_TRINITY_DN2103_c0_g1_i5; jgi|Krisp1|2640980|fgenesh1_kg.14_#_3811_#_TRINITY_DN2103_c0_g1_i16	PF11563; PF11563	Protoglobin; Protoglobin	IPR044398; IPR044398	Globin-sensor domain; Globin-sensor domain
jgi|Krisp1|2535755|fgenesh1_kg.1_#_6942_#_TRINITY_DN2013_c0_g1_i4; jgi|Krisp1|2640987|fgenesh1_kg.14_#_3818_#_TRINITY_DN2013_c0_g1_i3
jgi|Krisp1|2535764|fgenesh1_kg.1_#_6951_#_TRINITY_DN269_c0_g1_i30; jgi|Krisp1|2702011|estExt_Genewise1.C_14_t20132	PF01979; PF01979	Amidohydrolase family; Amidohydrolase family	IPR006680; IPR006680	Amidohydrolase-related; Amidohydrolase-related
jgi|Krisp1|2535775|fgenesh1_kg.1_#_6962_#_TRINITY_DN5995_c0_g1_i10; jgi|Krisp1|2641006|fgenesh1_kg.14_#_3837_#_TRINITY_DN5995_c0_g1_i10	PF01266; PF01266	FAD dependent oxidoreductase; FAD dependent oxidoreductase	IPR006076; IPR006076	FAD dependent oxidoreductase; FAD dependent oxidoreductase
jgi|Krisp1|2535781|fgenesh1_kg.1_#_6968_#_TRINITY_DN5995_c0_g2_i2; jgi|Krisp1|2641012|fgenesh1_kg.14_#_3843_#_TRINITY_DN5995_c0_g2_i2	PF00795; PF00795	Carbon-nitrogen hydrolase; Carbon-nitrogen hydrolase	IPR003010; IPR003010	Carbon-nitrogen hydrolase; Carbon-nitrogen hydrolase
jgi|Krisp1|2535865|fgenesh1_kg.1_#_7052_#_TRINITY_DN6422_c0_g2_i18; jgi|Krisp1|2641086|fgenesh1_kg.14_#_3917_#_TRINITY_DN6422_c0_g2_i18
jgi|Krisp1|2535872|fgenesh1_kg.1_#_7059_#_TRINITY_DN6745_c0_g1_i9; jgi|Krisp1|2641100|fgenesh1_kg.14_#_3931_#_TRINITY_DN6745_c0_g1_i15
jgi|Krisp1|2535989|fgenesh1_kg.1_#_7176_#_TRINITY_DN4442_c0_g1_i21; jgi|Krisp1|2640901|fgenesh1_kg.14_#_3732_#_TRINITY_DN4442_c0_g1_i21	PF00248; PF00248	Aldo/keto reductase family; Aldo/keto reductase family	IPR023210; IPR023210	NADP-dependent oxidoreductase domain; NADP-dependent oxidoreductase domain
jgi|Krisp1|2536012|fgenesh1_kg.1_#_7199_#_TRINITY_DN277_c2_g1_i6; jgi|Krisp1|2640878|fgenesh1_kg.14_#_3709_#_TRINITY_DN277_c2_g1_i4	PF11312; PF11312	Putative SAM-dependent methyltransferase; Putative SAM-dependent methyltransferase	IPR021463; IPR021463	Putative SAM-dependent methyltransferase; Putative SAM-dependent methyltransferase
jgi|Krisp1|2536019|fgenesh1_kg.1_#_7206_#_TRINITY_DN5783_c0_g1_i3; jgi|Krisp1|2640870|fgenesh1_kg.14_#_3701_#_TRINITY_DN5783_c0_g1_i3
jgi|Krisp1|2536032|fgenesh1_kg.1_#_7219_#_TRINITY_DN0_c6_g2_i4; jgi|Krisp1|2640856|fgenesh1_kg.14_#_3687_#_TRINITY_DN0_c6_g2_i4	PF00479, PF02781; PF00479, PF02781	Glucose-6-phosphate dehydrogenase, NAD binding domain, Glucose-6-phosphate dehydrogenase, C-terminal domain; Glucose-6-phosphate dehydrogenase, NAD binding domain, Glucose-6-phosphate dehydrogenase, C-terminal domain	IPR022674, IPR022675; IPR022674, IPR022675	Glucose-6-phosphate dehydrogenase, NAD-binding, Glucose-6-phosphate dehydrogenase, C-terminal; Glucose-6-phosphate dehydrogenase, NAD-binding, Glucose-6-phosphate dehydrogenase, C-terminal
jgi|Krisp1|2536041|fgenesh1_kg.1_#_7228_#_TRINITY_DN0_c0_g1_i16; jgi|Krisp1|2640850|fgenesh1_kg.14_#_3681_#_TRINITY_DN0_c0_g1_i16	PF00012; PF00012	Hsp70 protein; Hsp70 protein	IPR013126; IPR013126	Heat shock protein 70 family; Heat shock protein 70 family
jgi|Krisp1|2536051|fgenesh1_kg.1_#_7238_#_TRINITY_DN1647_c0_g1_i1; jgi|Krisp1|2640844|fgenesh1_kg.14_#_3675_#_TRINITY_DN1647_c0_g1_i14	PF00106; PF00106	short chain dehydrogenase; short chain dehydrogenase	IPR002347; IPR002347	Short-chain dehydrogenase/reductase SDR; Short-chain dehydrogenase/reductase SDR
jgi|Krisp1|2536052|fgenesh1_kg.1_#_7239_#_TRINITY_DN1647_c0_g1_i5; jgi|Krisp1|2640839|fgenesh1_kg.14_#_3670_#_TRINITY_DN1647_c0_g1_i5	PF09597; PF09597	IGR protein motif; IGR protein motif	IPR019083; IPR019083	IGR domain; IGR domain
jgi|Krisp1|2536056|fgenesh1_kg.1_#_7243_#_TRINITY_DN7942_c0_g1_i6; jgi|Krisp1|2640837|fgenesh1_kg.14_#_3668_#_TRINITY_DN7942_c0_g1_i6	PF11976; PF11976	Ubiquitin-2 like Rad60 SUMO-like; Ubiquitin-2 like Rad60 SUMO-like	IPR022617; IPR022617	Rad60/SUMO-like domain; Rad60/SUMO-like domain
jgi|Krisp1|2536075|fgenesh1_kg.1_#_7262_#_TRINITY_DN4674_c0_g1_i18; jgi|Krisp1|2640814|fgenesh1_kg.14_#_3645_#_TRINITY_DN4674_c0_g1_i18	PF00022; PF00022	Actin; Actin	IPR004000; IPR004000	Actin family; Actin family
jgi|Krisp1|2536080|fgenesh1_kg.1_#_7267_#_TRINITY_DN7783_c0_g3_i1; jgi|Krisp1|2727362|gm4.18458_g	PF12923; PF12923	Ribosomal RNA-processing protein 7 (RRP7) C-terminal domain; Ribosomal RNA-processing protein 7 (RRP7) C-terminal domain	IPR024326; IPR024326	Ribosomal RNA-processing protein 7, C-terminal domain; Ribosomal RNA-processing protein 7, C-terminal domain
jgi|Krisp1|2536088|fgenesh1_kg.1_#_7275_#_TRINITY_DN2208_c0_g1_i9; jgi|Krisp1|2640800|fgenesh1_kg.14_#_3631_#_TRINITY_DN2208_c0_g1_i57	PF04515; PF04515	Plasma-membrane choline transporter; Plasma-membrane choline transporter	IPR007603; IPR007603	Choline transporter-like; Choline transporter-like
jgi|Krisp1|2536095|fgenesh1_kg.1_#_7282_#_TRINITY_DN11719_c0_g1_i1; jgi|Krisp1|2640796|fgenesh1_kg.14_#_3627_#_TRINITY_DN11719_c0_g1_i1	PF00250; PF00250	Forkhead domain; Forkhead domain	IPR001766; IPR001766	Fork head domain; Fork head domain
jgi|Krisp1|2536097|fgenesh1_kg.1_#_7284_#_TRINITY_DN11719_c0_g4_i1; jgi|Krisp1|2640798|fgenesh1_kg.14_#_3629_#_TRINITY_DN11719_c0_g4_i1
jgi|Krisp1|2536109|fgenesh1_kg.1_#_7296_#_TRINITY_DN4064_c0_g1_i5; jgi|Krisp1|2640784|fgenesh1_kg.14_#_3615_#_TRINITY_DN4064_c0_g1_i5	PF04303; PF04303	PrpF protein; PrpF protein	IPR007400; IPR007400	PrpF-like; PrpF-like
jgi|Krisp1|2536114|fgenesh1_kg.1_#_7301_#_TRINITY_DN6186_c0_g1_i7; jgi|Krisp1|2640774|fgenesh1_kg.14_#_3605_#_TRINITY_DN6186_c0_g1_i11	PF01435, PF16491; PF16491, PF01435	Peptidase family M48, CAAX prenyl protease N-terminal, five membrane helices; CAAX prenyl protease N-terminal, five membrane helices, Peptidase family M48	IPR001915, IPR032456; IPR032456, IPR001915	Peptidase M48, CAAX prenyl protease 1, N-terminal; CAAX prenyl protease 1, N-terminal, Peptidase M48
jgi|Krisp1|2536142|fgenesh1_kg.1_#_7329_#_TRINITY_DN6927_c0_g3_i2; jgi|Krisp1|2701948|estExt_Genewise1.C_14_t20069	PF07798; PF07798	Coiled-coil domain-containing protein 90-like; Coiled-coil domain-containing protein 90-like	IPR024461; IPR024461	Coiled-coil domain-containing protein 90-like; Coiled-coil domain-containing protein 90-like
jgi|Krisp1|2536167|fgenesh1_kg.1_#_7354_#_TRINITY_DN7674_c0_g1_i45; jgi|Krisp1|2640721|fgenesh1_kg.14_#_3552_#_TRINITY_DN7674_c0_g1_i45	PF08696, PF13086, PF13087; PF13087, PF13086, PF08696	DNA replication factor Dna2, AAA domain, AAA domain; AAA domain, AAA domain, DNA replication factor Dna2	IPR014808, IPR041677, IPR041679; IPR041679, IPR041677, IPR014808	DNA replication factor Dna2, N-terminal, DNA2/NAM7 helicase, helicase domain, DNA2/NAM7 helicase-like, C-terminal; DNA2/NAM7 helicase-like, C-terminal, DNA2/NAM7 helicase, helicase domain, DNA replication factor Dna2, N-terminal
jgi|Krisp1|2536193|fgenesh1_kg.1_#_7380_#_TRINITY_DN290_c0_g3_i1; jgi|Krisp1|2640699|fgenesh1_kg.14_#_3530_#_TRINITY_DN290_c0_g3_i1
jgi|Krisp1|2536194|fgenesh1_kg.1_#_7381_#_TRINITY_DN6968_c0_g1_i2; jgi|Krisp1|2640697|fgenesh1_kg.14_#_3528_#_TRINITY_DN6968_c0_g1_i3	PF09791; PF09791	Oxidoreductase-like protein, N-terminal; Oxidoreductase-like protein, N-terminal	IPR019180; IPR019180	Oxidoreductase-like, N-terminal; Oxidoreductase-like, N-terminal
jgi|Krisp1|2536200|fgenesh1_kg.1_#_7387_#_TRINITY_DN3390_c1_g1_i18; jgi|Krisp1|2752495|estExt_Genemark4.C_14_t20076	PF10263; PF10263	SprT-like family; SprT-like family	IPR006640; IPR006640	SprT-like; SprT-like
jgi|Krisp1|2536205|fgenesh1_kg.1_#_7392_#_TRINITY_DN3390_c0_g1_i3; jgi|Krisp1|2640689|fgenesh1_kg.14_#_3520_#_TRINITY_DN3390_c0_g1_i3	PF10294; PF10294	Lysine methyltransferase; Lysine methyltransferase	IPR019410; IPR019410	Lysine methyltransferase; Lysine methyltransferase
jgi|Krisp1|2536213|fgenesh1_kg.1_#_7400_#_TRINITY_DN5714_c0_g1_i3; jgi|Krisp1|2640683|fgenesh1_kg.14_#_3514_#_TRINITY_DN5714_c0_g1_i3
jgi|Krisp1|2536229|fgenesh1_kg.1_#_7416_#_TRINITY_DN5965_c0_g1_i6; jgi|Krisp1|2752490|estExt_Genemark4.C_14_t20071	PF04248; PF04248	Domain of unknown function (DUF427); Domain of unknown function (DUF427)	IPR007361; IPR007361	Domain of unknown function DUF427; Domain of unknown function DUF427
jgi|Krisp1|2536232|fgenesh1_kg.1_#_7419_#_TRINITY_DN5965_c1_g1_i1; jgi|Krisp1|2640663|fgenesh1_kg.14_#_3494_#_TRINITY_DN5965_c1_g1_i1	PF00704; PF00704	Glycosyl hydrolases family 18; Glycosyl hydrolases family 18	IPR001223; IPR001223	Glycoside hydrolase family 18, catalytic domain; Glycoside hydrolase family 18, catalytic domain
jgi|Krisp1|2536237|fgenesh1_kg.1_#_7424_#_TRINITY_DN11939_c1_g1_i4; jgi|Krisp1|2640658|fgenesh1_kg.14_#_3489_#_TRINITY_DN11939_c1_g1_i4
jgi|Krisp1|2536241|fgenesh1_kg.1_#_7428_#_TRINITY_DN11939_c0_g1_i1; jgi|Krisp1|2640655|fgenesh1_kg.14_#_3486_#_TRINITY_DN11939_c0_g1_i1	PF11221; PF11221	Subunit 21 of Mediator complex; Subunit 21 of Mediator complex	IPR021384; IPR021384	Mediator complex, subunit Med21; Mediator complex, subunit Med21
jgi|Krisp1|2536250|fgenesh1_kg.1_#_7437_#_TRINITY_DN4554_c0_g1_i9; jgi|Krisp1|2640645|fgenesh1_kg.14_#_3476_#_TRINITY_DN4554_c0_g1_i9	PF00172, PF04082; PF04082, PF00172	Fungal Zn(2)-Cys(6) binuclear cluster domain, Fungal specific transcription factor domain; Fungal specific transcription factor domain, Fungal Zn(2)-Cys(6) binuclear cluster domain	IPR001138, IPR007219; IPR007219, IPR001138	Zn(2)Cys(6) fungal-type DNA-binding domain, Transcription factor domain, fungi; Transcription factor domain, fungi, Zn(2)Cys(6) fungal-type DNA-binding domain
jgi|Krisp1|2536269|fgenesh1_kg.1_#_7456_#_TRINITY_DN695_c0_g1_i15; jgi|Krisp1|2640625|fgenesh1_kg.14_#_3456_#_TRINITY_DN695_c0_g1_i15
jgi|Krisp1|2536285|fgenesh1_kg.1_#_7472_#_TRINITY_DN4048_c0_g1_i8; jgi|Krisp1|2640620|fgenesh1_kg.14_#_3451_#_TRINITY_DN4048_c0_g1_i8	PF00830; PF00830	Ribosomal L28 family; Ribosomal L28 family	IPR026569; IPR026569	Large ribosomal subunit protein bL28; Large ribosomal subunit protein bL28
jgi|Krisp1|2536306|fgenesh1_kg.1_#_7493_#_TRINITY_DN4722_c1_g2_i1; jgi|Krisp1|2640600|fgenesh1_kg.14_#_3431_#_TRINITY_DN4722_c1_g2_i1	PF05047; PF05047	Mitochondrial ribosomal protein L51 / S25 / CI-B8 domain; Mitochondrial ribosomal protein L51 / S25 / CI-B8 domain	IPR007741; IPR007741	Ribosomal protein/NADH dehydrogenase domain; Ribosomal protein/NADH dehydrogenase domain
jgi|Krisp1|2536314|fgenesh1_kg.1_#_7501_#_TRINITY_DN4722_c0_g1_i22; jgi|Krisp1|2640591|fgenesh1_kg.14_#_3422_#_TRINITY_DN4722_c0_g1_i22	PF00400, PF04053; PF00400, PF04053	WD domain, G-beta repeat, Coatomer WD associated region; WD domain, G-beta repeat, Coatomer WD associated region	IPR001680, IPR006692; IPR001680, IPR006692	WD40 repeat, Coatomer, WD associated region; WD40 repeat, Coatomer, WD associated region
jgi|Krisp1|2536318|fgenesh1_kg.1_#_7505_#_TRINITY_DN6075_c0_g2_i3; jgi|Krisp1|2640586|fgenesh1_kg.14_#_3417_#_TRINITY_DN6075_c0_g2_i3	PF00249; PF00249	Myb-like DNA-binding domain; Myb-like DNA-binding domain	IPR001005; IPR001005	SANT/Myb domain; SANT/Myb domain
jgi|Krisp1|2536348|fgenesh1_kg.1_#_7535_#_TRINITY_DN5894_c0_g1_i1; jgi|Krisp1|2640561|fgenesh1_kg.14_#_3392_#_TRINITY_DN5894_c0_g1_i1	PF03481, PF01300; PF03481, PF01300	Threonylcarbamoyl-AMP synthase, C-terminal domain, Telomere recombination; Threonylcarbamoyl-AMP synthase, C-terminal domain, Telomere recombination	IPR005145, IPR006070; IPR005145, IPR006070	Threonylcarbamoyl-AMP synthase, C-terminal domain, Threonylcarbamoyl-AMP synthase-like domain; Threonylcarbamoyl-AMP synthase, C-terminal domain, Threonylcarbamoyl-AMP synthase-like domain
jgi|Krisp1|2536351|fgenesh1_kg.1_#_7538_#_TRINITY_DN175_c0_g1_i12; jgi|Krisp1|2727311|gm4.18407_g	PF13499; PF13499	EF-hand domain pair; EF-hand domain pair	IPR002048; IPR002048	EF-hand domain; EF-hand domain
jgi|Krisp1|2536372|fgenesh1_kg.1_#_7559_#_TRINITY_DN4846_c0_g1_i182; jgi|Krisp1|2640540|fgenesh1_kg.14_#_3371_#_TRINITY_DN4846_c0_g1_i182	PF01873, PF02020; PF01873, PF02020	Domain found in IF2B/IF5, eIF4-gamma/eIF5/eIF2-epsilon; Domain found in IF2B/IF5, eIF4-gamma/eIF5/eIF2-epsilon	IPR002735, IPR003307; IPR002735, IPR003307	Translation initiation factor IF2/IF5 domain, W2 domain; Translation initiation factor IF2/IF5 domain, W2 domain
jgi|Krisp1|2536391|fgenesh1_kg.1_#_7578_#_TRINITY_DN6310_c0_g2_i5; jgi|Krisp1|2640524|fgenesh1_kg.14_#_3355_#_TRINITY_DN6310_c0_g2_i5	PF08159; PF08159	NUC153 domain; NUC153 domain	IPR012580; IPR012580	NUC153; NUC153
jgi|Krisp1|2536438|fgenesh1_kg.1_#_7625_#_TRINITY_DN6969_c0_g1_i9; jgi|Krisp1|2640333|fgenesh1_kg.14_#_3164_#_TRINITY_DN6969_c0_g1_i7	PF00326, PF00930; PF00326, PF00930	Prolyl oligopeptidase family, Dipeptidyl peptidase IV (DPP IV) N-terminal region; Prolyl oligopeptidase family, Dipeptidyl peptidase IV (DPP IV) N-terminal region	IPR001375, IPR002469; IPR001375, IPR002469	Peptidase S9, prolyl oligopeptidase, catalytic domain, Dipeptidylpeptidase IV, N-terminal domain; Peptidase S9, prolyl oligopeptidase, catalytic domain, Dipeptidylpeptidase IV, N-terminal domain
jgi|Krisp1|2536449|fgenesh1_kg.1_#_7636_#_TRINITY_DN3787_c0_g1_i1; jgi|Krisp1|2640323|fgenesh1_kg.14_#_3154_#_TRINITY_DN3787_c0_g1_i1	PF00172; PF00172	Fungal Zn(2)-Cys(6) binuclear cluster domain; Fungal Zn(2)-Cys(6) binuclear cluster domain	IPR001138; IPR001138	Zn(2)Cys(6) fungal-type DNA-binding domain; Zn(2)Cys(6) fungal-type DNA-binding domain
jgi|Krisp1|2536463|fgenesh1_kg.1_#_7650_#_TRINITY_DN4079_c0_g1_i28; jgi|Krisp1|2640308|fgenesh1_kg.14_#_3139_#_TRINITY_DN4079_c0_g1_i28
jgi|Krisp1|2536466|fgenesh1_kg.1_#_7653_#_TRINITY_DN4079_c0_g1_i38; jgi|Krisp1|2640305|fgenesh1_kg.14_#_3136_#_TRINITY_DN4079_c0_g1_i38
jgi|Krisp1|2536470|fgenesh1_kg.1_#_7657_#_TRINITY_DN4263_c0_g1_i2; jgi|Krisp1|2640300|fgenesh1_kg.14_#_3131_#_TRINITY_DN4263_c0_g1_i4
jgi|Krisp1|2536480|fgenesh1_kg.1_#_7667_#_TRINITY_DN298_c0_g1_i7; jgi|Krisp1|2640292|fgenesh1_kg.14_#_3123_#_TRINITY_DN298_c0_g1_i18	PF01535, PF13041; PF01535, PF13041	PPR repeat, PPR repeat family; PPR repeat, PPR repeat family	IPR002885, IPR002885; IPR002885, IPR002885	Pentatricopeptide repeat, Pentatricopeptide repeat; Pentatricopeptide repeat, Pentatricopeptide repeat
jgi|Krisp1|2536495|fgenesh1_kg.1_#_7682_#_TRINITY_DN4655_c0_g1_i38; jgi|Krisp1|2640276|fgenesh1_kg.14_#_3107_#_TRINITY_DN4655_c0_g1_i38	PF09668; PF09668	Aspartyl protease; Aspartyl protease	IPR019103; IPR019103	Aspartic peptidase, DDI1-type; Aspartic peptidase, DDI1-type
jgi|Krisp1|2536498|fgenesh1_kg.1_#_7685_#_TRINITY_DN3630_c1_g1_i1; jgi|Krisp1|2640274|fgenesh1_kg.14_#_3105_#_TRINITY_DN3630_c1_g1_i4	PF05019; PF05019	Coenzyme Q (ubiquinone) biosynthesis protein Coq4; Coenzyme Q (ubiquinone) biosynthesis protein Coq4	IPR007715; IPR007715	Ubiquinone biosynthesis protein Coq4; Ubiquinone biosynthesis protein Coq4
jgi|Krisp1|2536504|fgenesh1_kg.1_#_7691_#_TRINITY_DN3630_c1_g2_i5; jgi|Krisp1|2640265|fgenesh1_kg.14_#_3096_#_TRINITY_DN3630_c1_g2_i5	PF13012, PF01398; PF01398, PF13012	Maintenance of mitochondrial structure and function, JAB1/Mov34/MPN/PAD-1 ubiquitin protease; JAB1/Mov34/MPN/PAD-1 ubiquitin protease, Maintenance of mitochondrial structure and function	IPR024969, IPR000555; IPR000555, IPR024969	EIF3F/CSN6-like, C-terminal, JAB1/MPN/MOV34 metalloenzyme domain; JAB1/MPN/MOV34 metalloenzyme domain, EIF3F/CSN6-like, C-terminal
jgi|Krisp1|2536532|fgenesh1_kg.1_#_7719_#_TRINITY_DN4523_c0_g1_i8; jgi|Krisp1|2640241|fgenesh1_kg.14_#_3072_#_TRINITY_DN4523_c0_g1_i8	PF08613; PF08613	Cyclin; Cyclin	IPR013922; IPR013922	Cyclin PHO80-like; Cyclin PHO80-like
jgi|Krisp1|2536537|fgenesh1_kg.1_#_7724_#_TRINITY_DN4523_c1_g1_i23; jgi|Krisp1|2640232|fgenesh1_kg.14_#_3063_#_TRINITY_DN4523_c1_g1_i23	PF00069; PF00069	Protein kinase domain; Protein kinase domain	IPR000719; IPR000719	Protein kinase domain; Protein kinase domain
jgi|Krisp1|2536544|fgenesh1_kg.1_#_7731_#_TRINITY_DN11472_c0_g2_i8; jgi|Krisp1|2640224|fgenesh1_kg.14_#_3055_#_TRINITY_DN11472_c0_g2_i8
jgi|Krisp1|2536554|fgenesh1_kg.1_#_7741_#_TRINITY_DN3637_c0_g1_i15; jgi|Krisp1|2640217|fgenesh1_kg.14_#_3048_#_TRINITY_DN3637_c0_g1_i24	PF03006; PF03006	Haemolysin-III related; Haemolysin-III related	IPR004254; IPR004254	AdipoR/Haemolysin-III-related; AdipoR/Haemolysin-III-related
jgi|Krisp1|2536576|fgenesh1_kg.1_#_7763_#_TRINITY_DN4478_c0_g1_i2; jgi|Krisp1|2644721|fgenesh1_kg.15_#_3612_#_TRINITY_DN4478_c0_g1_i2; jgi|Krisp1|2577910|fgenesh1_kg.5_#_938_#_TRINITY_DN4478_c0_g1_i2; jgi|Krisp1|2645646|fgenesh1_kg.16_#_676_#_TRINITY_DN4478_c0_g1_i2
jgi|Krisp1|2536770|fgenesh1_kg.1_#_7957_#_TRINITY_DN300_c0_g1_i9; jgi|Krisp1|2669620|fgenesh1_kg.25_#_248_#_TRINITY_DN300_c0_g1_i2; jgi|Krisp1|2655422|fgenesh1_kg.19_#_50_#_TRINITY_DN300_c0_g1_i2
jgi|Krisp1|2536799|fgenesh1_kg.1_#_7986_#_TRINITY_DN4867_c0_g2_i2; jgi|Krisp1|2655384|fgenesh1_kg.19_#_12_#_TRINITY_DN4867_c0_g2_i1	PF01753; PF01753	MYND finger; MYND finger	IPR002893; IPR002893	Zinc finger, MYND-type; Zinc finger, MYND-type
jgi|Krisp1|2536812|fgenesh1_kg.1_#_7999_#_TRINITY_DN7421_c0_g1_i8; jgi|Krisp1|2655399|fgenesh1_kg.19_#_27_#_TRINITY_DN7421_c0_g1_i5
jgi|Krisp1|2536824|fgenesh1_kg.1_#_8011_#_TRINITY_DN2585_c1_g2_i2; jgi|Krisp1|2681075|fgenesh1_kg.38_#_285_#_TRINITY_DN2585_c1_g2_i2	PF14226, PF03171; PF14226, PF03171	non-haem dioxygenase in morphine synthesis N-terminal, 2OG-Fe(II) oxygenase superfamily; non-haem dioxygenase in morphine synthesis N-terminal, 2OG-Fe(II) oxygenase superfamily	IPR026992, IPR044861; IPR026992, IPR044861	Non-haem dioxygenase N-terminal domain, Isopenicillin N synthase-like, Fe(2) 2OG dioxygenase domain; Non-haem dioxygenase N-terminal domain, Isopenicillin N synthase-like, Fe(2) 2OG dioxygenase domain
jgi|Krisp1|2536831|fgenesh1_kg.1_#_8018_#_TRINITY_DN1526_c0_g1_i3; jgi|Krisp1|2681079|fgenesh1_kg.38_#_289_#_TRINITY_DN1526_c0_g1_i3	PF00172; PF00172	Fungal Zn(2)-Cys(6) binuclear cluster domain; Fungal Zn(2)-Cys(6) binuclear cluster domain	IPR001138; IPR001138	Zn(2)Cys(6) fungal-type DNA-binding domain; Zn(2)Cys(6) fungal-type DNA-binding domain
jgi|Krisp1|2536954|fgenesh1_kg.1_#_8141_#_TRINITY_DN248_c1_g1_i16; jgi|Krisp1|2538046|fgenesh1_kg.1_#_9233_#_TRINITY_DN248_c1_g1_i16; jgi|Krisp1|2759898|fgenesh1_pm.1_#_521	PF00199, PF06628; PF06628, PF00199; PF06628, PF00199	Catalase, Catalase-related immune-responsive; Catalase-related immune-responsive, Catalase; Catalase-related immune-responsive, Catalase	IPR011614, IPR010582; IPR010582, IPR011614; IPR010582, IPR011614	Catalase core domain, Catalase immune-responsive domain; Catalase immune-responsive domain, Catalase core domain; Catalase immune-responsive domain, Catalase core domain
jgi|Krisp1|2537113|fgenesh1_kg.1_#_8300_#_TRINITY_DN654_c0_g1_i2; jgi|Krisp1|2537183|fgenesh1_kg.1_#_8370_#_TRINITY_DN654_c0_g1_i2; jgi|Krisp1|2637050|fgenesh1_kg.13_#_4524_#_TRINITY_DN654_c0_g1_i2; jgi|Krisp1|2637121|fgenesh1_kg.13_#_4595_#_TRINITY_DN654_c0_g1_i2	PF02301; PF02301; PF02301; PF02301	HORMA domain; HORMA domain; HORMA domain; HORMA domain	IPR003511; IPR003511; IPR003511; IPR003511	HORMA domain; HORMA domain; HORMA domain; HORMA domain
jgi|Krisp1|2537326|fgenesh1_kg.1_#_8513_#_TRINITY_DN1433_c1_g1_i6; jgi|Krisp1|2537411|fgenesh1_kg.1_#_8598_#_TRINITY_DN1433_c1_g1_i2; jgi|Krisp1|2636831|fgenesh1_kg.13_#_4305_#_TRINITY_DN1433_c1_g1_i2
jgi|Krisp1|2538965|fgenesh1_kg.1_#_10152_#_TRINITY_DN2358_c0_g1_i5; jgi|Krisp1|2792062|estExt_fgenesh1_pg.C_13_t10362
jgi|Krisp1|2541508|fgenesh1_kg.1_#_12695_#_TRINITY_DN3619_c0_g1_i3; jgi|Krisp1|2541604|fgenesh1_kg.1_#_12791_#_TRINITY_DN3619_c0_g1_i3
jgi|Krisp1|2542545|fgenesh1_kg.1_#_13732_#_TRINITY_DN3046_c1_g1_i11; jgi|Krisp1|2542584|fgenesh1_kg.1_#_13771_#_TRINITY_DN3046_c1_g1_i11; jgi|Krisp1|2611043|fgenesh1_kg.9_#_2585_#_TRINITY_DN3046_c1_g1_i2; jgi|Krisp1|2611002|fgenesh1_kg.9_#_2544_#_TRINITY_DN3046_c1_g1_i2	PF02179; PF02179; PF02179; PF02179	BAG domain; BAG domain; BAG domain; BAG domain	IPR003103; IPR003103; IPR003103; IPR003103	BAG domain; BAG domain; BAG domain; BAG domain
jgi|Krisp1|2542658|fgenesh1_kg.1_#_13845_#_TRINITY_DN611_c0_g1_i2; jgi|Krisp1|2722455|gm4.13551_g	PF05368; PF05368	NmrA-like family; NmrA-like family	IPR008030; IPR008030	NmrA-like domain; NmrA-like domain
jgi|Krisp1|2542714|fgenesh1_kg.1_#_13901_#_TRINITY_DN10593_c0_g1_i1; jgi|Krisp1|2611063|fgenesh1_kg.9_#_2605_#_TRINITY_DN10593_c0_g1_i8	PF00296; PF00296	Luciferase-like monooxygenase; Luciferase-like monooxygenase	IPR011251; IPR011251	Luciferase-like domain; Luciferase-like domain
jgi|Krisp1|2543058|fgenesh1_kg.1_#_14245_#_TRINITY_DN11670_c0_g1_i28; jgi|Krisp1|2610544|fgenesh1_kg.9_#_2086_#_TRINITY_DN11670_c0_g1_i28
jgi|Krisp1|2543447|fgenesh1_kg.1_#_14634_#_TRINITY_DN219_c0_g1_i6; jgi|Krisp1|2543598|fgenesh1_kg.1_#_14785_#_TRINITY_DN219_c0_g1_i6; jgi|Krisp1|2543688|fgenesh1_kg.1_#_14875_#_TRINITY_DN219_c0_g1_i6; jgi|Krisp1|2543542|fgenesh1_kg.1_#_14729_#_TRINITY_DN219_c0_g1_i6
jgi|Krisp1|2543465|fgenesh1_kg.1_#_14652_#_TRINITY_DN7703_c0_g2_i6; jgi|Krisp1|2543675|fgenesh1_kg.1_#_14862_#_TRINITY_DN7703_c0_g2_i6
jgi|Krisp1|2543482|fgenesh1_kg.1_#_14669_#_TRINITY_DN7524_c0_g1_i14; jgi|Krisp1|2543659|fgenesh1_kg.1_#_14846_#_TRINITY_DN7524_c0_g1_i14	PF00106; PF00106	short chain dehydrogenase; short chain dehydrogenase	IPR002347; IPR002347	Short-chain dehydrogenase/reductase SDR; Short-chain dehydrogenase/reductase SDR
jgi|Krisp1|2543492|fgenesh1_kg.1_#_14679_#_TRINITY_DN6627_c0_g1_i7; jgi|Krisp1|2543645|fgenesh1_kg.1_#_14832_#_TRINITY_DN6627_c0_g1_i7	PF13602; PF13602	Zinc-binding dehydrogenase; Zinc-binding dehydrogenase
jgi|Krisp1|2543502|fgenesh1_kg.1_#_14689_#_TRINITY_DN2862_c0_g1_i28; jgi|Krisp1|2543729|fgenesh1_kg.1_#_14916_#_TRINITY_DN2862_c0_g1_i28; jgi|Krisp1|2543637|fgenesh1_kg.1_#_14824_#_TRINITY_DN2862_c0_g1_i8	PF10495; PF10495; PF10495	Pericentrin-AKAP-450 domain of centrosomal targeting protein; Pericentrin-AKAP-450 domain of centrosomal targeting protein; Pericentrin-AKAP-450 domain of centrosomal targeting protein	IPR019528; IPR019528; IPR019528	Pericentrin/AKAP-450 centrosomal targeting domain; Pericentrin/AKAP-450 centrosomal targeting domain; Pericentrin/AKAP-450 centrosomal targeting domain
jgi|Krisp1|2543512|fgenesh1_kg.1_#_14699_#_TRINITY_DN5388_c0_g1_i12; jgi|Krisp1|2543627|fgenesh1_kg.1_#_14814_#_TRINITY_DN5388_c0_g1_i12; jgi|Krisp1|2543721|fgenesh1_kg.1_#_14908_#_TRINITY_DN5388_c0_g1_i12
jgi|Krisp1|2543519|fgenesh1_kg.1_#_14706_#_TRINITY_DN3791_c0_g1_i6; jgi|Krisp1|2543621|fgenesh1_kg.1_#_14808_#_TRINITY_DN3791_c0_g1_i6
jgi|Krisp1|2544057|fgenesh1_kg.1_#_15244_#_TRINITY_DN1225_c0_g2_i2; jgi|Krisp1|2609822|fgenesh1_kg.9_#_1364_#_TRINITY_DN1225_c0_g2_i2
jgi|Krisp1|2544319|fgenesh1_kg.1_#_15506_#_TRINITY_DN176_c0_g2_i1; jgi|Krisp1|2609591|fgenesh1_kg.9_#_1133_#_TRINITY_DN176_c0_g2_i1
jgi|Krisp1|2545508|fgenesh1_kg.1_#_16695_#_TRINITY_DN11888_c0_g1_i3; jgi|Krisp1|2669369|fgenesh1_kg.24_#_1799_#_TRINITY_DN11888_c0_g1_i3	PF13391; PF13391	HNH endonuclease; HNH endonuclease	IPR003615; IPR003615	HNH nuclease; HNH nuclease
jgi|Krisp1|2545548|fgenesh1_kg.1_#_16735_#_TRINITY_DN5758_c0_g4_i3; jgi|Krisp1|2594388|fgenesh1_kg.7_#_1252_#_TRINITY_DN5758_c0_g4_i3; jgi|Krisp1|2594426|fgenesh1_kg.7_#_1290_#_TRINITY_DN5758_c0_g4_i3	PF05153; PF05153; PF05153	Myo-inositol oxygenase; Myo-inositol oxygenase; Myo-inositol oxygenase	IPR007828; IPR007828; IPR007828	Inositol oxygenase; Inositol oxygenase; Inositol oxygenase
jgi|Krisp1|2545552|fgenesh1_kg.1_#_16739_#_TRINITY_DN5758_c0_g3_i8; jgi|Krisp1|2594394|fgenesh1_kg.7_#_1258_#_TRINITY_DN5758_c0_g3_i7; jgi|Krisp1|2594420|fgenesh1_kg.7_#_1284_#_TRINITY_DN5758_c0_g3_i8
jgi|Krisp1|2546032|fgenesh1_kg.2_#_391_#_TRINITY_DN4296_c0_g1_i3; jgi|Krisp1|2584116|fgenesh1_kg.5_#_7144_#_TRINITY_DN4296_c0_g1_i3
jgi|Krisp1|2546135|fgenesh1_kg.2_#_494_#_TRINITY_DN3604_c0_g1_i15; jgi|Krisp1|2546144|fgenesh1_kg.2_#_503_#_TRINITY_DN3604_c0_g1_i15	PF00205, PF02776, PF02775; PF02776, PF02775, PF00205	Thiamine pyrophosphate enzyme, central domain, Thiamine pyrophosphate enzyme, N-terminal TPP binding domain, Thiamine pyrophosphate enzyme, C-terminal TPP binding domain; Thiamine pyrophosphate enzyme, N-terminal TPP binding domain, Thiamine pyrophosphate enzyme, C-terminal TPP binding domain, Thiamine pyrophosphate enzyme, central domain	IPR012000, IPR012001, IPR011766; IPR012001, IPR011766, IPR012000	Thiamine pyrophosphate enzyme, central domain, Thiamine pyrophosphate enzyme, N-terminal TPP-binding domain, Thiamine pyrophosphate enzyme, TPP-binding; Thiamine pyrophosphate enzyme, N-terminal TPP-binding domain, Thiamine pyrophosphate enzyme, TPP-binding, Thiamine pyrophosphate enzyme, central domain
jgi|Krisp1|2546251|fgenesh1_kg.2_#_610_#_TRINITY_DN1304_c0_g1_i3; jgi|Krisp1|2550809|fgenesh1_kg.2_#_5168_#_TRINITY_DN1304_c0_g1_i3	PF01490; PF01490	Transmembrane amino acid transporter protein; Transmembrane amino acid transporter protein	IPR013057; IPR013057	Amino acid transporter, transmembrane domain; Amino acid transporter, transmembrane domain
jgi|Krisp1|2546545|fgenesh1_kg.2_#_904_#_TRINITY_DN389_c0_g1_i27; jgi|Krisp1|2583485|fgenesh1_kg.5_#_6513_#_TRINITY_DN389_c0_g1_i27	PF04163; PF04163	Tht1-like nuclear fusion protein; Tht1-like nuclear fusion protein	IPR007292; IPR007292	Nuclear fusion protein Kar5; Nuclear fusion protein Kar5
jgi|Krisp1|2546552|fgenesh1_kg.2_#_911_#_TRINITY_DN389_c0_g1_i9; jgi|Krisp1|2583492|fgenesh1_kg.5_#_6520_#_TRINITY_DN389_c0_g1_i9
jgi|Krisp1|2546559|fgenesh1_kg.2_#_918_#_TRINITY_DN3073_c0_g1_i6; jgi|Krisp1|2583499|fgenesh1_kg.5_#_6527_#_TRINITY_DN3073_c0_g1_i9
jgi|Krisp1|2546569|fgenesh1_kg.2_#_928_#_TRINITY_DN10638_c0_g1_i5; jgi|Krisp1|2583505|fgenesh1_kg.5_#_6533_#_TRINITY_DN10638_c0_g1_i5	PF00108, PF02803; PF02803, PF00108	Thiolase, N-terminal domain, Thiolase, C-terminal domain; Thiolase, C-terminal domain, Thiolase, N-terminal domain	IPR020616, IPR020617; IPR020617, IPR020616	Thiolase, N-terminal, Thiolase, C-terminal; Thiolase, C-terminal, Thiolase, N-terminal
jgi|Krisp1|2546574|fgenesh1_kg.2_#_933_#_TRINITY_DN7860_c0_g2_i15; jgi|Krisp1|2583515|fgenesh1_kg.5_#_6543_#_TRINITY_DN7860_c0_g2_i15	PF03798; PF03798	TLC domain; TLC domain	IPR006634; IPR006634	TRAM/LAG1/CLN8 homology domain; TRAM/LAG1/CLN8 homology domain
jgi|Krisp1|2546584|fgenesh1_kg.2_#_943_#_TRINITY_DN5333_c0_g1_i23; jgi|Krisp1|2583522|fgenesh1_kg.5_#_6550_#_TRINITY_DN5333_c0_g1_i23	PF07690; PF07690	Major Facilitator Superfamily; Major Facilitator Superfamily	IPR011701; IPR011701	Major facilitator superfamily; Major facilitator superfamily
jgi|Krisp1|2546653|fgenesh1_kg.2_#_1012_#_TRINITY_DN3357_c0_g1_i10; jgi|Krisp1|2583410|fgenesh1_kg.5_#_6438_#_TRINITY_DN3357_c0_g1_i10	PF00675, PF05193; PF00675, PF05193	Insulinase (Peptidase family M16), Peptidase M16 inactive domain; Insulinase (Peptidase family M16), Peptidase M16 inactive domain	IPR011765, IPR007863; IPR011765, IPR007863	Peptidase M16, N-terminal, Peptidase M16, C-terminal; Peptidase M16, N-terminal, Peptidase M16, C-terminal
jgi|Krisp1|2546654|fgenesh1_kg.2_#_1013_#_TRINITY_DN3210_c0_g1_i16; jgi|Krisp1|2583411|fgenesh1_kg.5_#_6439_#_TRINITY_DN3210_c0_g1_i16	PF00366; PF00366	Ribosomal protein S17; Ribosomal protein S17	IPR000266; IPR000266	Small ribosomal subunit protein uS17; Small ribosomal subunit protein uS17
jgi|Krisp1|2546666|fgenesh1_kg.2_#_1025_#_TRINITY_DN7012_c0_g1_i4; jgi|Krisp1|2583421|fgenesh1_kg.5_#_6449_#_TRINITY_DN7012_c0_g1_i4	PF00657; PF00657	GDSL-like Lipase/Acylhydrolase; GDSL-like Lipase/Acylhydrolase	IPR001087; IPR001087	GDSL lipase/esterase; GDSL lipase/esterase
jgi|Krisp1|2546677|fgenesh1_kg.2_#_1036_#_TRINITY_DN10400_c0_g1_i2; jgi|Krisp1|2583433|fgenesh1_kg.5_#_6461_#_TRINITY_DN10400_c0_g1_i2
jgi|Krisp1|2547634|fgenesh1_kg.2_#_1993_#_TRINITY_DN7140_c0_g1_i18; jgi|Krisp1|2547733|fgenesh1_kg.2_#_2092_#_TRINITY_DN7140_c0_g1_i6
jgi|Krisp1|2548912|fgenesh1_kg.2_#_3271_#_TRINITY_DN4048_c0_g1_i18; jgi|Krisp1|2581131|fgenesh1_kg.5_#_4159_#_TRINITY_DN4048_c0_g1_i25	PF04178; PF04178	Got1/Sft2-like family; Got1/Sft2-like family	IPR007305; IPR007305	Vesicle transport protein, Got1/SFT2-like; Vesicle transport protein, Got1/SFT2-like
jgi|Krisp1|2550533|fgenesh1_kg.2_#_4892_#_TRINITY_DN8004_c0_g2_i3; jgi|Krisp1|2759718|fgenesh1_pm.1_#_341	PF00296; PF00296	Luciferase-like monooxygenase; Luciferase-like monooxygenase	IPR011251; IPR011251	Luciferase-like domain; Luciferase-like domain
jgi|Krisp1|2552104|fgenesh1_kg.2_#_6463_#_TRINITY_DN593_c0_g1_i19; jgi|Krisp1|2566840|fgenesh1_kg.3_#_9827_#_TRINITY_DN593_c0_g1_i12	PF00106; PF00106	short chain dehydrogenase; short chain dehydrogenase	IPR002347; IPR002347	Short-chain dehydrogenase/reductase SDR; Short-chain dehydrogenase/reductase SDR
jgi|Krisp1|2552981|fgenesh1_kg.2_#_7340_#_TRINITY_DN10791_c0_g2_i13; jgi|Krisp1|2658252|fgenesh1_kg.20_#_59_#_TRINITY_DN10791_c0_g2_i14	PF02798; PF02798	Glutathione S-transferase, N-terminal domain; Glutathione S-transferase, N-terminal domain	IPR004045; IPR004045	Glutathione S-transferase, N-terminal; Glutathione S-transferase, N-terminal
jgi|Krisp1|2558075|fgenesh1_kg.3_#_1062_#_TRINITY_DN4012_c0_g1_i3; jgi|Krisp1|2558108|fgenesh1_kg.3_#_1095_#_TRINITY_DN4012_c0_g1_i10	PF06398; PF06398	Integral peroxisomal membrane peroxin; Integral peroxisomal membrane peroxin	IPR010482; IPR010482	Peroxin domain; Peroxin domain
jgi|Krisp1|2558082|fgenesh1_kg.3_#_1069_#_TRINITY_DN918_c0_g1_i21; jgi|Krisp1|2647716|fgenesh1_kg.16_#_2746_#_TRINITY_DN918_c0_g1_i28	PF00443; PF00443	Ubiquitin carboxyl-terminal hydrolase; Ubiquitin carboxyl-terminal hydrolase	IPR001394; IPR001394	Peptidase C19, ubiquitin carboxyl-terminal hydrolase; Peptidase C19, ubiquitin carboxyl-terminal hydrolase
jgi|Krisp1|2558356|fgenesh1_kg.3_#_1343_#_TRINITY_DN986_c0_g1_i26; jgi|Krisp1|2572404|fgenesh1_kg.4_#_4401_#_TRINITY_DN986_c0_g1_i26	PF01070, PF00173; PF00173, PF01070	FMN-dependent dehydrogenase, Cytochrome b5-like Heme/Steroid binding domain; Cytochrome b5-like Heme/Steroid binding domain, FMN-dependent dehydrogenase	IPR000262, IPR001199; IPR001199, IPR000262	FMN-dependent dehydrogenase, Cytochrome b5-like heme/steroid binding domain; Cytochrome b5-like heme/steroid binding domain, FMN-dependent dehydrogenase
jgi|Krisp1|2558646|fgenesh1_kg.3_#_1633_#_TRINITY_DN1271_c1_g1_i7; jgi|Krisp1|2559894|fgenesh1_kg.3_#_2881_#_TRINITY_DN1271_c1_g1_i12
jgi|Krisp1|2558718|fgenesh1_kg.3_#_1705_#_TRINITY_DN1271_c0_g1_i20; jgi|Krisp1|2558726|fgenesh1_kg.3_#_1713_#_TRINITY_DN1271_c0_g1_i20	PF02798, PF00043; PF02798, PF00043	Glutathione S-transferase, N-terminal domain, Glutathione S-transferase, C-terminal domain; Glutathione S-transferase, N-terminal domain, Glutathione S-transferase, C-terminal domain	IPR004045, IPR004046; IPR004045, IPR004046	Glutathione S-transferase, N-terminal, Glutathione S-transferase, C-terminal; Glutathione S-transferase, N-terminal, Glutathione S-transferase, C-terminal
jgi|Krisp1|2559218|fgenesh1_kg.3_#_2205_#_TRINITY_DN790_c0_g1_i24; jgi|Krisp1|2559252|fgenesh1_kg.3_#_2239_#_TRINITY_DN790_c0_g1_i24	PF14953; PF14953	Domain of unknown function (DUF4504); Domain of unknown function (DUF4504)	IPR027850; IPR027850	Protein of unknown function DUF4504; Protein of unknown function DUF4504
jgi|Krisp1|2561014|fgenesh1_kg.3_#_4001_#_TRINITY_DN3493_c0_g2_i1; jgi|Krisp1|2593141|fgenesh1_kg.7_#_5_#_TRINITY_DN3493_c0_g2_i1	PF00106; PF00106	short chain dehydrogenase; short chain dehydrogenase	IPR002347; IPR002347	Short-chain dehydrogenase/reductase SDR; Short-chain dehydrogenase/reductase SDR
jgi|Krisp1|2561288|fgenesh1_kg.3_#_4275_#_TRINITY_DN6439_c0_g1_i8; jgi|Krisp1|2621712|fgenesh1_kg.10_#_6347_#_TRINITY_DN6439_c0_g1_i8	PF13561; PF13561	Enoyl-(Acyl carrier protein) reductase; Enoyl-(Acyl carrier protein) reductase	-; -	-; -
jgi|Krisp1|2561307|fgenesh1_kg.3_#_4294_#_TRINITY_DN10740_c0_g1_i6; jgi|Krisp1|2621733|fgenesh1_kg.10_#_6368_#_TRINITY_DN10740_c0_g1_i6	PF00083; PF00083	Sugar (and other) transporter; Sugar (and other) transporter	IPR005828; IPR005828	Major facilitator, sugar transporter-like; Major facilitator, sugar transporter-like
jgi|Krisp1|2562139|fgenesh1_kg.3_#_5126_#_TRINITY_DN2502_c0_g1_i3; jgi|Krisp1|2907156|MIX109861_30886_89	PF01090; PF01090	Ribosomal protein S19e; Ribosomal protein S19e	IPR001266; IPR001266	Small ribosomal subunit protein eS19; Small ribosomal subunit protein eS19
jgi|Krisp1|2562366|fgenesh1_kg.3_#_5353_#_TRINITY_DN3110_c1_g1_i1; jgi|Krisp1|2620510|fgenesh1_kg.10_#_5145_#_TRINITY_DN3110_c1_g1_i1	PF00018, PF04366; PF04366, PF00018	SH3 domain, Las17-binding protein actin regulator; Las17-binding protein actin regulator, SH3 domain	IPR001452, IPR007461; IPR007461, IPR001452	SH3 domain, Ysc84 actin-binding domain; Ysc84 actin-binding domain, SH3 domain
jgi|Krisp1|2562557|fgenesh1_kg.3_#_5544_#_TRINITY_DN9617_c0_g1_i1; jgi|Krisp1|2620273|fgenesh1_kg.10_#_4908_#_TRINITY_DN9617_c0_g1_i1
jgi|Krisp1|2562563|fgenesh1_kg.3_#_5550_#_TRINITY_DN5650_c1_g1_i8; jgi|Krisp1|2620278|fgenesh1_kg.10_#_4913_#_TRINITY_DN5650_c1_g1_i8	PF03874; PF03874	RNA polymerase Rpb4; RNA polymerase Rpb4	IPR005574; IPR005574	RNA polymerase subunit Rpb4/RPC9; RNA polymerase subunit Rpb4/RPC9
jgi|Krisp1|2562592|fgenesh1_kg.3_#_5579_#_TRINITY_DN7689_c0_g1_i1; jgi|Krisp1|2620308|fgenesh1_kg.10_#_4943_#_TRINITY_DN7689_c0_g1_i1	PF10405, PF10403, PF03835, PF10404; PF10404, PF10405, PF10403, PF03835	Rad4 beta-hairpin domain 3, Rad4 beta-hairpin domain 1, Rad4 transglutaminase-like domain, Rad4 beta-hairpin domain 2; Rad4 beta-hairpin domain 2, Rad4 beta-hairpin domain 3, Rad4 beta-hairpin domain 1, Rad4 transglutaminase-like domain	IPR018328, IPR018326, IPR018325, IPR018327; IPR018327, IPR018328, IPR018326, IPR018325	Rad4 beta-hairpin domain 3, Rad4 beta-hairpin domain 1, Rad4/PNGase transglutaminase-like fold, Rad4 beta-hairpin domain 2; Rad4 beta-hairpin domain 2, Rad4 beta-hairpin domain 3, Rad4 beta-hairpin domain 1, Rad4/PNGase transglutaminase-like fold
jgi|Krisp1|2562609|fgenesh1_kg.3_#_5596_#_TRINITY_DN10694_c0_g1_i2; jgi|Krisp1|2620326|fgenesh1_kg.10_#_4961_#_TRINITY_DN10694_c0_g1_i2	PF02894, PF01408; PF01408, PF02894	Oxidoreductase family, C-terminal alpha/beta domain, Oxidoreductase family, NAD-binding Rossmann fold; Oxidoreductase family, NAD-binding Rossmann fold, Oxidoreductase family, C-terminal alpha/beta domain	IPR004104, IPR000683; IPR000683, IPR004104	Gfo/Idh/MocA-like oxidoreductase, C-terminal, Gfo/Idh/MocA-like oxidoreductase, N-terminal; Gfo/Idh/MocA-like oxidoreductase, N-terminal, Gfo/Idh/MocA-like oxidoreductase, C-terminal
jgi|Krisp1|2562736|fgenesh1_kg.3_#_5723_#_TRINITY_DN77_c0_g1_i34; jgi|Krisp1|2591530|fgenesh1_kg.6_#_5981_#_TRINITY_DN77_c0_g1_i37
jgi|Krisp1|2562874|fgenesh1_kg.3_#_5861_#_TRINITY_DN4253_c0_g2_i2; jgi|Krisp1|2619945|fgenesh1_kg.10_#_4580_#_TRINITY_DN4253_c0_g2_i2	PF00092; PF00092	von Willebrand factor type A domain; von Willebrand factor type A domain	IPR002035; IPR002035	von Willebrand factor, type A; von Willebrand factor, type A
jgi|Krisp1|2562879|fgenesh1_kg.3_#_5866_#_TRINITY_DN4253_c0_g1_i3; jgi|Krisp1|2573244|fgenesh1_kg.4_#_5241_#_TRINITY_DN4253_c0_g1_i5; jgi|Krisp1|2619950|fgenesh1_kg.10_#_4585_#_TRINITY_DN4253_c0_g1_i3	PF08650; PF08650; PF08650	DASH complex subunit Dad4; DASH complex subunit Dad4; DASH complex subunit Dad4	IPR013959; IPR013959; IPR013959	DASH complex subunit Dad4; DASH complex subunit Dad4; DASH complex subunit Dad4
jgi|Krisp1|2562901|fgenesh1_kg.3_#_5888_#_TRINITY_DN5106_c0_g2_i12; jgi|Krisp1|2619972|fgenesh1_kg.10_#_4607_#_TRINITY_DN5106_c0_g2_i12	PF00025; PF00025	ADP-ribosylation factor family; ADP-ribosylation factor family	IPR006689; IPR006689	Small GTPase superfamily, ARF/SAR type; Small GTPase superfamily, ARF/SAR type
jgi|Krisp1|2562918|fgenesh1_kg.3_#_5905_#_TRINITY_DN9107_c0_g1_i3; jgi|Krisp1|2619993|fgenesh1_kg.10_#_4628_#_TRINITY_DN9107_c0_g1_i3
jgi|Krisp1|2562942|fgenesh1_kg.3_#_5929_#_TRINITY_DN5093_c0_g1_i9; jgi|Krisp1|2620014|fgenesh1_kg.10_#_4649_#_TRINITY_DN5093_c0_g1_i9	PF07247; PF07247	Alcohol acetyltransferase; Alcohol acetyltransferase	IPR010828; IPR010828	Alcohol acetyltransferase/N-acetyltransferase; Alcohol acetyltransferase/N-acetyltransferase
jgi|Krisp1|2563125|fgenesh1_kg.3_#_6112_#_TRINITY_DN4577_c0_g1_i10; jgi|Krisp1|2563227|fgenesh1_kg.3_#_6214_#_TRINITY_DN4577_c0_g1_i4	PF00083; PF00083	Sugar (and other) transporter; Sugar (and other) transporter	IPR005828; IPR005828	Major facilitator, sugar transporter-like; Major facilitator, sugar transporter-like
jgi|Krisp1|2564090|fgenesh1_kg.3_#_7077_#_TRINITY_DN877_c0_g2_i2; jgi|Krisp1|2565280|fgenesh1_kg.3_#_8267_#_TRINITY_DN877_c0_g1_i1	PF09807; PF09807	Elongation complex protein 6; Elongation complex protein 6	IPR018627; IPR018627	Elongator complex protein 6; Elongator complex protein 6
jgi|Krisp1|2565048|fgenesh1_kg.3_#_8035_#_TRINITY_DN1048_c0_g1_i10; jgi|Krisp1|2735049|estExt_Genemark4.C_1_t10343	PF00153; PF00153	Mitochondrial carrier protein; Mitochondrial carrier protein	IPR018108; IPR018108	Mitochondrial substrate/solute carrier; Mitochondrial substrate/solute carrier
jgi|Krisp1|2565986|fgenesh1_kg.3_#_8973_#_TRINITY_DN621_c0_g1_i10; jgi|Krisp1|2589483|fgenesh1_kg.6_#_3934_#_TRINITY_DN621_c0_g1_i9	PF00171; PF00171	Aldehyde dehydrogenase family; Aldehyde dehydrogenase family	IPR015590; IPR015590	Aldehyde dehydrogenase domain; Aldehyde dehydrogenase domain
jgi|Krisp1|2566043|fgenesh1_kg.3_#_9030_#_TRINITY_DN9439_c0_g1_i2; jgi|Krisp1|2770773|estExt_fgenesh1_pm.C_1_t20316	PF00185, PF02729; PF00185, PF02729	Aspartate/ornithine carbamoyltransferase, Asp/Orn binding domain, Aspartate/ornithine carbamoyltransferase, carbamoyl-P binding domain; Aspartate/ornithine carbamoyltransferase, Asp/Orn binding domain, Aspartate/ornithine carbamoyltransferase, carbamoyl-P binding domain	IPR006131, IPR006132; IPR006131, IPR006132	Aspartate/ornithine carbamoyltransferase, Asp/Orn-binding domain, Aspartate/ornithine carbamoyltransferase, carbamoyl-P binding; Aspartate/ornithine carbamoyltransferase, Asp/Orn-binding domain, Aspartate/ornithine carbamoyltransferase, carbamoyl-P binding
jgi|Krisp1|2566852|fgenesh1_kg.3_#_9839_#_TRINITY_DN99_c0_g1_i5; jgi|Krisp1|2740666|estExt_Genemark4.C_3_t40100
jgi|Krisp1|2567236|fgenesh1_kg.3_#_10223_#_TRINITY_DN3635_c0_g1_i6; jgi|Krisp1|2616175|fgenesh1_kg.10_#_810_#_TRINITY_DN3635_c0_g1_i6
jgi|Krisp1|2567306|fgenesh1_kg.3_#_10293_#_TRINITY_DN7157_c0_g1_i2; jgi|Krisp1|2789920|estExt_fgenesh1_pg.C_10_t10075	PF02230; PF02230	Phospholipase/Carboxylesterase; Phospholipase/Carboxylesterase	IPR003140; IPR003140	Phospholipase/carboxylesterase/thioesterase; Phospholipase/carboxylesterase/thioesterase
jgi|Krisp1|2567864|fgenesh1_kg.3_#_10851_#_TRINITY_DN5648_c1_g1_i1; jgi|Krisp1|2615383|fgenesh1_kg.10_#_18_#_TRINITY_DN5648_c1_g1_i1	PF02037; PF02037	SAP domain; SAP domain	IPR003034; IPR003034	SAP domain; SAP domain
jgi|Krisp1|2567898|fgenesh1_kg.3_#_10885_#_TRINITY_DN14821_c0_g1_i18; jgi|Krisp1|2615417|fgenesh1_kg.10_#_52_#_TRINITY_DN14821_c0_g1_i3	PF04178; PF04178	Got1/Sft2-like family; Got1/Sft2-like family	IPR007305; IPR007305	Vesicle transport protein, Got1/SFT2-like; Vesicle transport protein, Got1/SFT2-like
jgi|Krisp1|2567930|fgenesh1_kg.3_#_10917_#_TRINITY_DN3087_c0_g1_i4; jgi|Krisp1|2665591|fgenesh1_kg.23_#_29_#_TRINITY_DN3087_c0_g1_i7; jgi|Krisp1|2615446|fgenesh1_kg.10_#_81_#_TRINITY_DN3087_c0_g1_i3
jgi|Krisp1|2568050|fgenesh1_kg.4_#_47_#_TRINITY_DN2655_c0_g1_i14; jgi|Krisp1|2661218|fgenesh1_kg.21_#_492_#_TRINITY_DN2655_c0_g1_i14	PF13450, PF00743; PF07992	NAD(P)-binding Rossmann-like domain, Flavin-binding monooxygenase-like; Pyridine nucleotide-disulphide oxidoreductase	-, IPR020946; IPR023753	-, Flavin monooxygenase-like; FAD/NAD(P)-binding domain
jgi|Krisp1|2568064|fgenesh1_kg.4_#_61_#_TRINITY_DN4908_c0_g2_i4; jgi|Krisp1|2661205|fgenesh1_kg.21_#_479_#_TRINITY_DN4908_c0_g2_i4	PF21032; PF21032	PROPPIN; PROPPIN	IPR048720; IPR048720	PROPPIN; PROPPIN
jgi|Krisp1|2568072|fgenesh1_kg.4_#_69_#_TRINITY_DN1628_c0_g1_i15; jgi|Krisp1|2661197|fgenesh1_kg.21_#_471_#_TRINITY_DN1628_c0_g1_i15	PF04563, PF04560, PF04565, PF04567, PF04561, PF00562, PF04566; PF04563, PF04565, PF04567, PF04561, PF04560, PF00562, PF04566	RNA polymerase beta subunit, RNA polymerase Rpb2, domain 7, RNA polymerase Rpb2, domain 3, RNA polymerase Rpb2, domain 5, RNA polymerase Rpb2, domain 2, RNA polymerase Rpb2, domain 6, RNA polymerase Rpb2, domain 4; RNA polymerase beta subunit, RNA polymerase Rpb2, domain 3, RNA polymerase Rpb2, domain 5, RNA polymerase Rpb2, domain 2, RNA polymerase Rpb2, domain 7, RNA polymerase Rpb2, domain 6, …	IPR007644, IPR007641, IPR007645, IPR007647, IPR007642, IPR007120, IPR007646; IPR007644, IPR007645, IPR007647, IPR007642, IPR007641, IPR007120, IPR007646	RNA polymerase, beta subunit, protrusion, RNA polymerase Rpb2, domain 7, RNA polymerase Rpb2, domain 3, RNA polymerase Rpb2, domain 5, RNA polymerase Rpb2, domain 2, DNA-directed RNA polymerase, subunit 2, hybrid-binding domain, RNA polymerase Rpb2, domain 4; RNA polymerase, beta subunit, protrusion, RNA polymerase Rpb2, domain 3, RNA polymerase Rpb2, domain 5, RNA polymerase Rpb2, domain 2, RNA …
jgi|Krisp1|2568074|fgenesh1_kg.4_#_71_#_TRINITY_DN7530_c0_g3_i1; jgi|Krisp1|2661193|fgenesh1_kg.21_#_467_#_TRINITY_DN7530_c0_g3_i1; jgi|Krisp1|2661452|fgenesh1_kg.21_#_726_#_TRINITY_DN7530_c0_g3_i1
jgi|Krisp1|2568091|fgenesh1_kg.4_#_88_#_TRINITY_DN9835_c0_g1_i13; jgi|Krisp1|2661177|fgenesh1_kg.21_#_451_#_TRINITY_DN9835_c0_g1_i13	PF01408; PF01408	Oxidoreductase family, NAD-binding Rossmann fold; Oxidoreductase family, NAD-binding Rossmann fold	IPR000683; IPR000683	Gfo/Idh/MocA-like oxidoreductase, N-terminal; Gfo/Idh/MocA-like oxidoreductase, N-terminal
jgi|Krisp1|2568103|fgenesh1_kg.4_#_100_#_TRINITY_DN4343_c0_g2_i2; jgi|Krisp1|2661164|fgenesh1_kg.21_#_438_#_TRINITY_DN4343_c0_g2_i2	PF00995; PF00995	Sec1 family; Sec1 family	IPR001619; IPR001619	Sec1-like protein; Sec1-like protein
jgi|Krisp1|2568137|fgenesh1_kg.4_#_134_#_TRINITY_DN5741_c0_g1_i4; jgi|Krisp1|2661132|fgenesh1_kg.21_#_406_#_TRINITY_DN5741_c0_g1_i4	PF00475; PF00475	Imidazoleglycerol-phosphate dehydratase; Imidazoleglycerol-phosphate dehydratase	IPR000807; IPR000807	Imidazoleglycerol-phosphate dehydratase; Imidazoleglycerol-phosphate dehydratase
jgi|Krisp1|2568141|fgenesh1_kg.4_#_138_#_TRINITY_DN5188_c0_g1_i1; jgi|Krisp1|2661129|fgenesh1_kg.21_#_403_#_TRINITY_DN5188_c0_g1_i1	PF12333; PF12333	Rix1 complex component involved in 60S ribosome maturation; Rix1 complex component involved in 60S ribosome maturation	IPR024679; IPR024679	Pre-rRNA-processing protein Ipi1, N-terminal; Pre-rRNA-processing protein Ipi1, N-terminal
jgi|Krisp1|2568145|fgenesh1_kg.4_#_142_#_TRINITY_DN1977_c0_g1_i15; jgi|Krisp1|2661126|fgenesh1_kg.21_#_400_#_TRINITY_DN1977_c0_g1_i15	PF08071, PF01479, PF16121, PF00900; PF08071, PF01479, PF16121, PF00900	RS4NT (NUC023) domain, S4 domain, 40S ribosomal protein S4 C-terminus, Ribosomal family S4e; RS4NT (NUC023) domain, S4 domain, 40S ribosomal protein S4 C-terminus, Ribosomal family S4e	IPR013843, IPR002942, IPR032277, IPR013845; IPR013843, IPR002942, IPR032277, IPR013845	Small ribosomal subunit protein eS4, N-terminal, RNA-binding S4 domain, Small ribosomal subunit protein eS4, C-terminal domain, Small ribosomal subunit protein eS4, central region; Small ribosomal subunit protein eS4, N-terminal, RNA-binding S4 domain, Small ribosomal subunit protein eS4, C-terminal domain, Small ribosomal subunit protein eS4, central region
jgi|Krisp1|2568189|fgenesh1_kg.4_#_186_#_TRINITY_DN2007_c1_g1_i3; jgi|Krisp1|2705066|estExt_Genewise1.C_210099	PF00149, PF05011; PF05011, PF00149	Calcineurin-like phosphoesterase, Lariat debranching enzyme, C-terminal domain; Lariat debranching enzyme, C-terminal domain, Calcineurin-like phosphoesterase	IPR004843, IPR007708; IPR007708, IPR004843	Calcineurin-like phosphoesterase domain, ApaH type, Lariat debranching enzyme, C-terminal; Lariat debranching enzyme, C-terminal, Calcineurin-like phosphoesterase domain, ApaH type
jgi|Krisp1|2568202|fgenesh1_kg.4_#_199_#_TRINITY_DN3045_c0_g1_i32; jgi|Krisp1|2661067|fgenesh1_kg.21_#_341_#_TRINITY_DN3045_c0_g1_i32	PF15985, PF18311, PF21262; PF18311, PF15985, PF21262	KH domain, Exosome complex exonuclease Rrp40 N-terminal domain, Exosome complex component RRP40, S1 domain; Exosome complex exonuclease Rrp40 N-terminal domain, KH domain, Exosome complex component RRP40, S1 domain	IPR004088, IPR041054, -; IPR041054, IPR004088, -	K Homology domain, type 1, Exosome complex exonuclease Rrp40, N-terminal domain, eukaryotes, -; Exosome complex exonuclease Rrp40, N-terminal domain, eukaryotes, K Homology domain, type 1, -
jgi|Krisp1|2568235|fgenesh1_kg.4_#_232_#_TRINITY_DN12733_c0_g1_i32; jgi|Krisp1|2661039|fgenesh1_kg.21_#_313_#_TRINITY_DN12733_c0_g1_i32
jgi|Krisp1|2568246|fgenesh1_kg.4_#_243_#_TRINITY_DN3828_c0_g1_i1; jgi|Krisp1|2661028|fgenesh1_kg.21_#_302_#_TRINITY_DN3828_c0_g1_i1	PF04479; PF04479	RTA1 like protein; RTA1 like protein	IPR007568; IPR007568	RTA-like protein; RTA-like protein
jgi|Krisp1|2568279|fgenesh1_kg.4_#_276_#_TRINITY_DN3518_c0_g1_i3; jgi|Krisp1|2661003|fgenesh1_kg.21_#_277_#_TRINITY_DN3518_c0_g1_i3	PF00596; PF00596	Class II Aldolase and Adducin N-terminal domain; Class II Aldolase and Adducin N-terminal domain	IPR001303; IPR001303	Class II aldolase/adducin N-terminal; Class II aldolase/adducin N-terminal
jgi|Krisp1|2568285|fgenesh1_kg.4_#_282_#_TRINITY_DN4916_c0_g3_i7; jgi|Krisp1|2660993|fgenesh1_kg.21_#_267_#_TRINITY_DN4916_c0_g3_i7	PF04192, PF00400; PF04192, PF00400	Utp21 specific WD40 associated putative domain, WD domain, G-beta repeat; Utp21 specific WD40 associated putative domain, WD domain, G-beta repeat	IPR007319, IPR001680; IPR007319, IPR001680	Small-subunit processome, Utp21, WD40 repeat; Small-subunit processome, Utp21, WD40 repeat
jgi|Krisp1|2568312|fgenesh1_kg.4_#_309_#_TRINITY_DN4518_c0_g1_i13; jgi|Krisp1|2660970|fgenesh1_kg.21_#_244_#_TRINITY_DN4518_c0_g1_i13	PF08547; PF08547	Complex I intermediate-associated protein 30 (CIA30); Complex I intermediate-associated protein 30 (CIA30)	IPR013857; IPR013857	NADH:ubiquinone oxidoreductase intermediate-associated protein 30; NADH:ubiquinone oxidoreductase intermediate-associated protein 30
jgi|Krisp1|2568315|fgenesh1_kg.4_#_312_#_TRINITY_DN4987_c0_g1_i3; jgi|Krisp1|2660968|fgenesh1_kg.21_#_242_#_TRINITY_DN4987_c0_g1_i3	PF00069; PF00069	Protein kinase domain; Protein kinase domain	IPR000719; IPR000719	Protein kinase domain; Protein kinase domain
jgi|Krisp1|2568382|fgenesh1_kg.4_#_379_#_TRINITY_DN5133_c0_g2_i8; jgi|Krisp1|2660909|fgenesh1_kg.21_#_183_#_TRINITY_DN5133_c0_g2_i8
jgi|Krisp1|2568388|fgenesh1_kg.4_#_385_#_TRINITY_DN4108_c0_g1_i2; jgi|Krisp1|2660903|fgenesh1_kg.21_#_177_#_TRINITY_DN4108_c0_g1_i2	PF13489; PF13489	Methyltransferase domain; Methyltransferase domain	-; -	-; -
jgi|Krisp1|2568398|fgenesh1_kg.4_#_395_#_TRINITY_DN3041_c0_g1_i3; jgi|Krisp1|2660892|fgenesh1_kg.21_#_166_#_TRINITY_DN3041_c0_g1_i3	PF17856, PF06068; PF06068, PF17856	TIP49 AAA-lid domain, TIP49 P-loop domain; TIP49 P-loop domain, TIP49 AAA-lid domain	IPR041048, IPR010339; IPR010339, IPR041048	RuvB-like, AAA-lid domain, TIP49, P-loop domain; TIP49, P-loop domain, RuvB-like, AAA-lid domain
jgi|Krisp1|2568410|fgenesh1_kg.4_#_407_#_TRINITY_DN2810_c0_g1_i8; jgi|Krisp1|2660880|fgenesh1_kg.21_#_154_#_TRINITY_DN2810_c0_g1_i8
jgi|Krisp1|2568421|fgenesh1_kg.4_#_418_#_TRINITY_DN6870_c0_g1_i8; jgi|Krisp1|2660869|fgenesh1_kg.21_#_143_#_TRINITY_DN6870_c0_g1_i14	PF01253; PF01253	Translation initiation factor SUI1; Translation initiation factor SUI1	IPR001950; IPR001950	SUI1 domain; SUI1 domain
jgi|Krisp1|2568427|fgenesh1_kg.4_#_424_#_TRINITY_DN8677_c0_g2_i1; jgi|Krisp1|2660863|fgenesh1_kg.21_#_137_#_TRINITY_DN8677_c0_g2_i3	PF17820, PF18265; PF17820, PF18265	PDZ domain, Nas2 N_terminal domain; PDZ domain, Nas2 N_terminal domain	IPR041489, IPR040815; IPR041489, IPR040815	PDZ domain 6, Nas2, N-terminal; PDZ domain 6, Nas2, N-terminal
jgi|Krisp1|2568460|fgenesh1_kg.4_#_457_#_TRINITY_DN4607_c1_g2_i7; jgi|Krisp1|2660831|fgenesh1_kg.21_#_105_#_TRINITY_DN4607_c1_g2_i7
jgi|Krisp1|2568496|fgenesh1_kg.4_#_493_#_TRINITY_DN9860_c0_g1_i4; jgi|Krisp1|2660794|fgenesh1_kg.21_#_68_#_TRINITY_DN9860_c0_g1_i4	PF13418, PF01344; PF13418, PF01344	Galactose oxidase, central domain, Kelch motif; Galactose oxidase, central domain, Kelch motif	-, IPR006652; -, IPR006652	-, Kelch repeat type 1; -, Kelch repeat type 1
jgi|Krisp1|2568508|fgenesh1_kg.4_#_505_#_TRINITY_DN1543_c0_g1_i29; jgi|Krisp1|2660782|fgenesh1_kg.21_#_56_#_TRINITY_DN1543_c0_g1_i34
jgi|Krisp1|2568516|fgenesh1_kg.4_#_513_#_TRINITY_DN2437_c1_g1_i7; jgi|Krisp1|2660777|fgenesh1_kg.21_#_51_#_TRINITY_DN2437_c1_g1_i7	PF00121; PF00121	Triosephosphate isomerase; Triosephosphate isomerase	IPR000652; IPR000652	Triosephosphate isomerase; Triosephosphate isomerase
jgi|Krisp1|2568522|fgenesh1_kg.4_#_519_#_TRINITY_DN4771_c0_g2_i2; jgi|Krisp1|2660770|fgenesh1_kg.21_#_44_#_TRINITY_DN4771_c0_g2_i2	PF00106; PF00106	short chain dehydrogenase; short chain dehydrogenase	IPR002347; IPR002347	Short-chain dehydrogenase/reductase SDR; Short-chain dehydrogenase/reductase SDR
jgi|Krisp1|2568529|fgenesh1_kg.4_#_526_#_TRINITY_DN7782_c0_g1_i3; jgi|Krisp1|2660763|fgenesh1_kg.21_#_37_#_TRINITY_DN7782_c0_g1_i3	PF13921; PF13921	Myb-like DNA-binding domain; Myb-like DNA-binding domain	-; -	-; -
jgi|Krisp1|2568546|fgenesh1_kg.4_#_543_#_TRINITY_DN1980_c1_g1_i6; jgi|Krisp1|2660744|fgenesh1_kg.21_#_18_#_TRINITY_DN1980_c1_g1_i5	PF00071; PF00071	Ras family; Ras family	IPR001806; IPR001806	Small GTPase; Small GTPase
jgi|Krisp1|2568557|fgenesh1_kg.4_#_554_#_TRINITY_DN10901_c0_g1_i17; jgi|Krisp1|2660737|fgenesh1_kg.21_#_11_#_TRINITY_DN10901_c0_g1_i17	PF00462; PF00462	Glutaredoxin; Glutaredoxin	IPR002109; IPR002109	Glutaredoxin; Glutaredoxin
jgi|Krisp1|2570140|fgenesh1_kg.4_#_2137_#_TRINITY_DN7550_c0_g2_i1; jgi|Krisp1|2654035|fgenesh1_kg.18_#_1748_#_TRINITY_DN7550_c0_g2_i1	PF03637; PF03637	Mob1/phocein family; Mob1/phocein family	IPR005301; IPR005301	MOB kinase activator family; MOB kinase activator family
jgi|Krisp1|2570148|fgenesh1_kg.4_#_2145_#_TRINITY_DN6453_c0_g1_i2; jgi|Krisp1|2654042|fgenesh1_kg.18_#_1755_#_TRINITY_DN6453_c0_g1_i2	PF13621; PF13621	Cupin-like domain; Cupin-like domain	IPR041667; IPR041667	Cupin-like domain 8; Cupin-like domain 8
jgi|Krisp1|2570151|fgenesh1_kg.4_#_2148_#_TRINITY_DN5211_c0_g1_i10; jgi|Krisp1|2654046|fgenesh1_kg.18_#_1759_#_TRINITY_DN5211_c0_g1_i10	PF00204, PF01751, PF02518, PF00521, PF16898; PF02518, PF00204, PF00521, PF01751, PF16898	DNA gyrase B, Toprim domain, Histidine kinase-, DNA gyrase B-, and HSP90-like ATPase, DNA gyrase/topoisomerase IV, subunit A, C-terminal associated domain of TOPRIM; Histidine kinase-, DNA gyrase B-, and HSP90-like ATPase, DNA gyrase B, DNA gyrase/topoisomerase IV, subunit A, Toprim domain, C-terminal associated domain of TOPRIM	IPR013506, IPR006171, IPR003594, IPR002205, IPR031660; IPR003594, IPR013506, IPR002205, IPR006171, IPR031660	DNA topoisomerase, type IIA, subunit B, domain 2, TOPRIM domain, Histidine kinase/HSP90-like ATPase, DNA topoisomerase, type IIA, domain A, C-terminal associated domain of TOPRIM; Histidine kinase/HSP90-like ATPase, DNA topoisomerase, type IIA, subunit B, domain 2, DNA topoisomerase, type IIA, domain A, TOPRIM domain, C-terminal associated domain of TOPRIM
jgi|Krisp1|2570775|fgenesh1_kg.4_#_2772_#_TRINITY_DN2079_c0_g1_i1; jgi|Krisp1|2570861|fgenesh1_kg.4_#_2858_#_TRINITY_DN2079_c0_g1_i1	PF00491; PF00491	Arginase family; Arginase family	IPR006035; IPR006035	Ureohydrolase; Ureohydrolase
jgi|Krisp1|2570893|fgenesh1_kg.4_#_2890_#_TRINITY_DN504_c0_g1_i36; jgi|Krisp1|2637807|fgenesh1_kg.14_#_638_#_TRINITY_DN504_c0_g1_i40	PF00923; PF00923	Transaldolase/Fructose-6-phosphate aldolase; Transaldolase/Fructose-6-phosphate aldolase	IPR001585; IPR001585	Transaldolase/Fructose-6-phosphate aldolase; Transaldolase/Fructose-6-phosphate aldolase
jgi|Krisp1|2571960|fgenesh1_kg.4_#_3957_#_TRINITY_DN1246_c0_g1_i3; jgi|Krisp1|2601133|fgenesh1_kg.8_#_39_#_TRINITY_DN1246_c0_g1_i40
jgi|Krisp1|2572333|fgenesh1_kg.4_#_4330_#_TRINITY_DN7585_c0_g2_i8; jgi|Krisp1|2590139|fgenesh1_kg.6_#_4590_#_TRINITY_DN7585_c0_g1_i24	PF00887; PF00887	Acyl CoA binding protein; Acyl CoA binding protein	IPR000582; IPR000582	Acyl-CoA-binding protein, ACBP; Acyl-CoA-binding protein, ACBP
jgi|Krisp1|2573374|fgenesh1_kg.4_#_5371_#_TRINITY_DN270_c0_g1_i26; jgi|Krisp1|2573404|fgenesh1_kg.4_#_5401_#_TRINITY_DN270_c0_g1_i26	PF01593, PF13450; PF01593	Flavin containing amine oxidoreductase, NAD(P)-binding Rossmann-like domain; Flavin containing amine oxidoreductase	IPR002937, -; IPR002937	Amine oxidase, -; Amine oxidase
jgi|Krisp1|2574161|fgenesh1_kg.4_#_6158_#_TRINITY_DN3954_c0_g1_i1; jgi|Krisp1|2603339|fgenesh1_kg.8_#_2245_#_TRINITY_DN3954_c0_g1_i1	PF12824; PF12824	Mitochondrial ribosomal protein subunit L20; Mitochondrial ribosomal protein subunit L20	-; -	-; -
jgi|Krisp1|2574354|fgenesh1_kg.4_#_6351_#_TRINITY_DN1805_c0_g1_i18; jgi|Krisp1|2574618|fgenesh1_kg.4_#_6615_#_TRINITY_DN1805_c0_g1_i18	PF02867, PF03477, PF00317; PF03477, PF02867, PF00317	Ribonucleotide reductase, barrel domain, ATP cone domain, Ribonucleotide reductase, all-alpha domain; ATP cone domain, Ribonucleotide reductase, barrel domain, Ribonucleotide reductase, all-alpha domain	IPR000788, IPR005144, IPR013509; IPR005144, IPR000788, IPR013509	Ribonucleotide reductase large subunit, C-terminal, ATP-cone domain, Ribonucleotide reductase large subunit, N-terminal; ATP-cone domain, Ribonucleotide reductase large subunit, C-terminal, Ribonucleotide reductase large subunit, N-terminal
jgi|Krisp1|2574700|fgenesh1_kg.4_#_6697_#_TRINITY_DN3081_c0_g1_i1; jgi|Krisp1|2603928|fgenesh1_kg.8_#_2834_#_TRINITY_DN3081_c0_g1_i1
jgi|Krisp1|2575282|fgenesh1_kg.4_#_7279_#_TRINITY_DN6376_c0_g1_i1; jgi|Krisp1|2604517|fgenesh1_kg.8_#_3423_#_TRINITY_DN6376_c0_g1_i1
jgi|Krisp1|2575283|fgenesh1_kg.4_#_7280_#_TRINITY_DN6376_c0_g1_i20; jgi|Krisp1|2604512|fgenesh1_kg.8_#_3418_#_TRINITY_DN6376_c0_g1_i24	PF07335; PF07335	Fungal chitosanase of glycosyl hydrolase group 75; Fungal chitosanase of glycosyl hydrolase group 75	IPR009939; IPR009939	Fungal chitosanase; Fungal chitosanase
jgi|Krisp1|2575289|fgenesh1_kg.4_#_7286_#_TRINITY_DN1260_c0_g2_i3; jgi|Krisp1|2604507|fgenesh1_kg.8_#_3413_#_TRINITY_DN1260_c0_g2_i3	PF19977; PF19977	xRRM domain; xRRM domain	IPR045537; IPR045537	La-related protein 7 homolog, xRRM domain; La-related protein 7 homolog, xRRM domain
jgi|Krisp1|2575298|fgenesh1_kg.4_#_7295_#_TRINITY_DN7113_c0_g2_i1; jgi|Krisp1|2604500|fgenesh1_kg.8_#_3406_#_TRINITY_DN7113_c0_g2_i1	PF00106; PF00106	short chain dehydrogenase; short chain dehydrogenase	IPR002347; IPR002347	Short-chain dehydrogenase/reductase SDR; Short-chain dehydrogenase/reductase SDR
jgi|Krisp1|2575931|fgenesh1_kg.4_#_7928_#_TRINITY_DN2174_c0_g1_i4; jgi|Krisp1|2576838|fgenesh1_kg.4_#_8835_#_TRINITY_DN2174_c0_g1_i5	PF00248; PF00248	Aldo/keto reductase family; Aldo/keto reductase family	IPR023210; IPR023210	NADP-dependent oxidoreductase domain; NADP-dependent oxidoreductase domain
jgi|Krisp1|2576082|fgenesh1_kg.4_#_8079_#_TRINITY_DN407_c0_g1_i28; jgi|Krisp1|2576092|fgenesh1_kg.4_#_8089_#_TRINITY_DN407_c0_g1_i22; jgi|Krisp1|2576104|fgenesh1_kg.4_#_8101_#_TRINITY_DN407_c0_g1_i22
jgi|Krisp1|2581435|fgenesh1_kg.5_#_4463_#_TRINITY_DN1836_c0_g1_i8; jgi|Krisp1|2656727|fgenesh1_kg.19_#_1355_#_TRINITY_DN1836_c0_g1_i5; jgi|Krisp1|2629510|fgenesh1_kg.12_#_2466_#_TRINITY_DN1836_c0_g1_i8; jgi|Krisp1|2680847|fgenesh1_kg.38_#_57_#_TRINITY_DN1836_c0_g1_i4; jgi|Krisp1|2641215|fgenesh1_kg.15_#_106_#_TRINITY_DN1836_c0_g1_i2; jgi|Krisp1|2592519|fgenesh1_kg.6_#_6970_#_TRINITY_DN1836_c0_g1_…	PF12550; PF12550; PF12550; PF12550; PF12550; PF12550	Transcriptional activator of glycolytic enzymes; Transcriptional activator of glycolytic enzymes; Transcriptional activator of glycolytic enzymes; Transcriptional activator of glycolytic enzymes; Transcriptional activator of glycolytic enzymes; Transcriptional activator of glycolytic enzymes	IPR022210; IPR022210; IPR022210; IPR022210; IPR022210; IPR022210	Transcription activator GCR1-like domain; Transcription activator GCR1-like domain; Transcription activator GCR1-like domain; Transcription activator GCR1-like domain; Transcription activator GCR1-like domain; Transcription activator GCR1-like domain
jgi|Krisp1|2583444|fgenesh1_kg.5_#_6472_#_TRINITY_DN1053_c2_g1_i7; jgi|Krisp1|2737513|estExt_Genemark4.C_2_t10178	PF00702; PF00702	haloacid dehalogenase-like hydrolase; haloacid dehalogenase-like hydrolase	-; -	-; -
jgi|Krisp1|2584909|fgenesh1_kg.5_#_7937_#_TRINITY_DN8779_c0_g1_i7; jgi|Krisp1|2677273|fgenesh1_kg.31_#_357_#_TRINITY_DN8779_c0_g1_i1
jgi|Krisp1|2585376|fgenesh1_kg.5_#_8404_#_TRINITY_DN7190_c0_g1_i4; jgi|Krisp1|2663155|fgenesh1_kg.21_#_2429_#_TRINITY_DN7190_c0_g1_i4	PF13391; PF13391	HNH endonuclease; HNH endonuclease	IPR003615; IPR003615	HNH nuclease; HNH nuclease
jgi|Krisp1|2585383|fgenesh1_kg.5_#_8411_#_TRINITY_DN6306_c0_g1_i12; jgi|Krisp1|2663109|fgenesh1_kg.21_#_2383_#_TRINITY_DN6306_c0_g1_i7	PF13391; PF13391	HNH endonuclease; HNH endonuclease	IPR003615; IPR003615	HNH nuclease; HNH nuclease
jgi|Krisp1|2585458|fgenesh1_kg.5_#_8486_#_TRINITY_DN6028_c0_g3_i1; jgi|Krisp1|2585491|fgenesh1_kg.5_#_8519_#_TRINITY_DN6028_c0_g3_i1	PF00172; PF00172	Fungal Zn(2)-Cys(6) binuclear cluster domain; Fungal Zn(2)-Cys(6) binuclear cluster domain	IPR001138; IPR001138	Zn(2)Cys(6) fungal-type DNA-binding domain; Zn(2)Cys(6) fungal-type DNA-binding domain
jgi|Krisp1|2585485|fgenesh1_kg.5_#_8513_#_TRINITY_DN2249_c0_g1_i31; jgi|Krisp1|2641144|fgenesh1_kg.15_#_35_#_TRINITY_DN2249_c0_g1_i26	PF00172; PF00172	Fungal Zn(2)-Cys(6) binuclear cluster domain; Fungal Zn(2)-Cys(6) binuclear cluster domain	IPR001138; IPR001138	Zn(2)Cys(6) fungal-type DNA-binding domain; Zn(2)Cys(6) fungal-type DNA-binding domain
jgi|Krisp1|2585558|fgenesh1_kg.6_#_9_#_TRINITY_DN1690_c1_g1_i9; jgi|Krisp1|2585629|fgenesh1_kg.6_#_80_#_TRINITY_DN1690_c1_g1_i9	PF04756; PF04756	OST3 / OST6 family, transporter family; OST3 / OST6 family, transporter family	IPR021149; IPR021149	Oligosaccharyl transferase complex, subunit OST3/OST6; Oligosaccharyl transferase complex, subunit OST3/OST6
jgi|Krisp1|2585650|fgenesh1_kg.6_#_101_#_TRINITY_DN12231_c2_g2_i1; jgi|Krisp1|2640489|fgenesh1_kg.14_#_3320_#_TRINITY_DN12231_c2_g2_i1	PF05368; PF05368	NmrA-like family; NmrA-like family	IPR008030; IPR008030	NmrA-like domain; NmrA-like domain
jgi|Krisp1|2586832|fgenesh1_kg.6_#_1283_#_TRINITY_DN6626_c0_g1_i6; jgi|Krisp1|2586884|fgenesh1_kg.6_#_1335_#_TRINITY_DN6626_c0_g1_i6; jgi|Krisp1|2766707|fgenesh1_pm.13_#_84	PF20263; PF20263; PF20263	LYR motif-containing protein 2-like; LYR motif-containing protein 2-like; LYR motif-containing protein 2-like	IPR046896; IPR046896; IPR046896	LYR motif-containing protein Cup1-like, N-terminal domain; LYR motif-containing protein Cup1-like, N-terminal domain; LYR motif-containing protein Cup1-like, N-terminal domain
jgi|Krisp1|2588131|fgenesh1_kg.6_#_2582_#_TRINITY_DN23200_c0_g1_i1; jgi|Krisp1|2634983|fgenesh1_kg.13_#_2457_#_TRINITY_DN23200_c0_g1_i1
jgi|Krisp1|2588264|fgenesh1_kg.6_#_2715_#_TRINITY_DN4925_c0_g1_i9; jgi|Krisp1|2632305|fgenesh1_kg.12_#_5261_#_TRINITY_DN4925_c0_g1_i9; jgi|Krisp1|2672325|fgenesh1_kg.26_#_1298_#_TRINITY_DN4925_c0_g1_i9	PF00248; PF00248; PF00248	Aldo/keto reductase family; Aldo/keto reductase family; Aldo/keto reductase family	IPR023210; IPR023210; IPR023210	NADP-dependent oxidoreductase domain; NADP-dependent oxidoreductase domain; NADP-dependent oxidoreductase domain
jgi|Krisp1|2588626|fgenesh1_kg.6_#_3077_#_TRINITY_DN4194_c0_g1_i1; jgi|Krisp1|2588670|fgenesh1_kg.6_#_3121_#_TRINITY_DN4194_c0_g1_i1	PF11951, PF00172; PF11951, PF00172	Fungal specific transcription factor domain, Fungal Zn(2)-Cys(6) binuclear cluster domain; Fungal specific transcription factor domain, Fungal Zn(2)-Cys(6) binuclear cluster domain	IPR021858, IPR001138; IPR021858, IPR001138	Fungal transcription factor, Zn(2)Cys(6) fungal-type DNA-binding domain; Fungal transcription factor, Zn(2)Cys(6) fungal-type DNA-binding domain
jgi|Krisp1|2588633|fgenesh1_kg.6_#_3084_#_TRINITY_DN465_c0_g1_i13; jgi|Krisp1|2588677|fgenesh1_kg.6_#_3128_#_TRINITY_DN465_c0_g1_i13	PF07690; PF07690	Major Facilitator Superfamily; Major Facilitator Superfamily	IPR011701; IPR011701	Major facilitator superfamily; Major facilitator superfamily
jgi|Krisp1|2588822|fgenesh1_kg.6_#_3273_#_TRINITY_DN5797_c1_g1_i3; jgi|Krisp1|2677893|fgenesh1_kg.32_#_113_#_TRINITY_DN5797_c1_g1_i3
jgi|Krisp1|2588827|fgenesh1_kg.6_#_3278_#_TRINITY_DN1333_c0_g2_i1; jgi|Krisp1|2733416|gm4.24512_g
jgi|Krisp1|2588931|fgenesh1_kg.6_#_3382_#_TRINITY_DN9313_c0_g1_i6; jgi|Krisp1|2714922|gm4.6018_g
jgi|Krisp1|2591074|fgenesh1_kg.6_#_5525_#_TRINITY_DN162_c0_g1_i46; jgi|Krisp1|2594086|fgenesh1_kg.7_#_950_#_TRINITY_DN162_c0_g1_i5	PF00044, PF02800; PF00044, PF02800	Glyceraldehyde 3-phosphate dehydrogenase, NAD binding domain, Glyceraldehyde 3-phosphate dehydrogenase, C-terminal domain; Glyceraldehyde 3-phosphate dehydrogenase, NAD binding domain, Glyceraldehyde 3-phosphate dehydrogenase, C-terminal domain	IPR020828, IPR020829; IPR020828, IPR020829	Glyceraldehyde 3-phosphate dehydrogenase, NAD(P) binding domain, Glyceraldehyde 3-phosphate dehydrogenase, catalytic domain; Glyceraldehyde 3-phosphate dehydrogenase, NAD(P) binding domain, Glyceraldehyde 3-phosphate dehydrogenase, catalytic domain
jgi|Krisp1|2593882|fgenesh1_kg.7_#_746_#_TRINITY_DN1855_c0_g1_i18; jgi|Krisp1|2719676|gm4.10772_g
jgi|Krisp1|2594376|fgenesh1_kg.7_#_1240_#_TRINITY_DN8508_c0_g1_i3; jgi|Krisp1|2594437|fgenesh1_kg.7_#_1301_#_TRINITY_DN8508_c0_g1_i3
jgi|Krisp1|2594381|fgenesh1_kg.7_#_1245_#_TRINITY_DN8472_c0_g1_i5; jgi|Krisp1|2594428|fgenesh1_kg.7_#_1292_#_TRINITY_DN8472_c0_g1_i5	PF00083; PF00083	Sugar (and other) transporter; Sugar (and other) transporter	IPR005828; IPR005828	Major facilitator, sugar transporter-like; Major facilitator, sugar transporter-like
jgi|Krisp1|2594399|fgenesh1_kg.7_#_1263_#_TRINITY_DN5790_c0_g1_i15; jgi|Krisp1|2594409|fgenesh1_kg.7_#_1273_#_TRINITY_DN5790_c0_g1_i15	PF02894, PF01408; PF02894, PF01408	Oxidoreductase family, C-terminal alpha/beta domain, Oxidoreductase family, NAD-binding Rossmann fold; Oxidoreductase family, C-terminal alpha/beta domain, Oxidoreductase family, NAD-binding Rossmann fold	IPR004104, IPR000683; IPR004104, IPR000683	Gfo/Idh/MocA-like oxidoreductase, C-terminal, Gfo/Idh/MocA-like oxidoreductase, N-terminal; Gfo/Idh/MocA-like oxidoreductase, C-terminal, Gfo/Idh/MocA-like oxidoreductase, N-terminal
jgi|Krisp1|2596465|fgenesh1_kg.7_#_3329_#_TRINITY_DN23162_c0_g1_i1; jgi|Krisp1|2681102|fgenesh1_kg.39_#_17_#_TRINITY_DN23162_c0_g1_i1
jgi|Krisp1|2600382|fgenesh1_kg.7_#_7246_#_TRINITY_DN1511_c1_g1_i26; jgi|Krisp1|2656009|fgenesh1_kg.19_#_637_#_TRINITY_DN1511_c1_g1_i35	PF00145; PF00145	C-5 cytosine-specific DNA methylase; C-5 cytosine-specific DNA methylase	IPR001525; IPR001525	C-5 cytosine methyltransferase; C-5 cytosine methyltransferase
jgi|Krisp1|2603353|fgenesh1_kg.8_#_2259_#_TRINITY_DN40_c0_g1_i15; jgi|Krisp1|2877046|MIX79751_7896_39	PF00324; PF00324	Amino acid permease; Amino acid permease	IPR004841; IPR004841	Amino acid permease/ SLC12A domain; Amino acid permease/ SLC12A domain
jgi|Krisp1|2608191|fgenesh1_kg.8_#_7097_#_TRINITY_DN5723_c0_g1_i8; jgi|Krisp1|2764936|fgenesh1_pm.8_#_546	PF16211, PF00125; PF16211, PF00125	C-terminus of histone H2A, Core histone H2A/H2B/H3/H4; C-terminus of histone H2A, Core histone H2A/H2B/H3/H4	IPR032454, IPR007125; IPR032454, IPR007125	Histone H2A, C-terminal domain, Histone H2A/H2B/H3; Histone H2A, C-terminal domain, Histone H2A/H2B/H3
jgi|Krisp1|2608471|fgenesh1_kg.9_#_13_#_TRINITY_DN9895_c0_g1_i22; jgi|Krisp1|2644958|fgenesh1_kg.15_#_3849_#_TRINITY_DN9895_c0_g1_i22	PF00067; PF00067	Cytochrome P450; Cytochrome P450	IPR001128; IPR001128	Cytochrome P450; Cytochrome P450
jgi|Krisp1|2608491|fgenesh1_kg.9_#_33_#_TRINITY_DN685_c0_g1_i18; jgi|Krisp1|2644927|fgenesh1_kg.15_#_3818_#_TRINITY_DN685_c0_g1_i18; jgi|Krisp1|2669333|fgenesh1_kg.24_#_1763_#_TRINITY_DN685_c0_g1_i18
jgi|Krisp1|2611001|fgenesh1_kg.9_#_2543_#_TRINITY_DN3046_c1_g1_i7; jgi|Krisp1|2611046|fgenesh1_kg.9_#_2588_#_TRINITY_DN3046_c1_g1_i7
jgi|Krisp1|2611071|fgenesh1_kg.9_#_2613_#_TRINITY_DN1522_c0_g1_i15; jgi|Krisp1|2611159|fgenesh1_kg.9_#_2701_#_TRINITY_DN1522_c0_g1_i15
jgi|Krisp1|2611080|fgenesh1_kg.9_#_2622_#_TRINITY_DN963_c0_g1_i1; jgi|Krisp1|2611151|fgenesh1_kg.9_#_2693_#_TRINITY_DN963_c0_g1_i1	PF07859; PF07859	alpha/beta hydrolase fold; alpha/beta hydrolase fold	IPR013094; IPR013094	Alpha/beta hydrolase fold-3; Alpha/beta hydrolase fold-3
jgi|Krisp1|2612912|fgenesh1_kg.9_#_4454_#_TRINITY_DN6420_c0_g1_i22; jgi|Krisp1|2612935|fgenesh1_kg.9_#_4477_#_TRINITY_DN6420_c0_g1_i22; jgi|Krisp1|2682577|fgenesh1_kg.46_#_151_#_TRINITY_DN6420_c0_g1_i22
jgi|Krisp1|2613017|fgenesh1_kg.9_#_4559_#_TRINITY_DN1599_c0_g1_i1; jgi|Krisp1|2671687|fgenesh1_kg.26_#_660_#_TRINITY_DN1599_c0_g1_i2	PF00909; PF00909	Ammonium Transporter Family; Ammonium Transporter Family	IPR024041; IPR024041	Ammonium transporter AmtB-like domain; Ammonium transporter AmtB-like domain
jgi|Krisp1|2613116|fgenesh1_kg.9_#_4658_#_TRINITY_DN715_c0_g1_i4; jgi|Krisp1|2613158|fgenesh1_kg.9_#_4700_#_TRINITY_DN715_c0_g1_i1	PF00324; PF00324	Amino acid permease; Amino acid permease	IPR004841; IPR004841	Amino acid permease/ SLC12A domain; Amino acid permease/ SLC12A domain
jgi|Krisp1|2614835|fgenesh1_kg.9_#_6377_#_TRINITY_DN776_c0_g1_i47; jgi|Krisp1|2622407|fgenesh1_kg.11_#_388_#_TRINITY_DN776_c0_g1_i32	PF11034; PF11034	Glucose-repressible protein Grg1; Glucose-repressible protein Grg1	IPR020100; IPR020100	Glucose-repressible protein Grg1; Glucose-repressible protein Grg1
jgi|Krisp1|2615255|fgenesh1_kg.9_#_6797_#_TRINITY_DN100_c0_g1_i4; jgi|Krisp1|2668251|fgenesh1_kg.24_#_681_#_TRINITY_DN100_c0_g1_i3; jgi|Krisp1|2668299|fgenesh1_kg.24_#_729_#_TRINITY_DN100_c0_g1_i3	PF00107, PF08240; PF08240, PF00107; PF08240, PF00107	Zinc-binding dehydrogenase, Alcohol dehydrogenase GroES-like domain; Alcohol dehydrogenase GroES-like domain, Zinc-binding dehydrogenase; Alcohol dehydrogenase GroES-like domain, Zinc-binding dehydrogenase	IPR013149, IPR013154; IPR013154, IPR013149; IPR013154, IPR013149	Alcohol dehydrogenase-like, C-terminal, Alcohol dehydrogenase-like, N-terminal; Alcohol dehydrogenase-like, N-terminal, Alcohol dehydrogenase-like, C-terminal; Alcohol dehydrogenase-like, N-terminal, Alcohol dehydrogenase-like, C-terminal
jgi|Krisp1|2621663|fgenesh1_kg.10_#_6298_#_TRINITY_DN9607_c0_g1_i4; jgi|Krisp1|2621686|fgenesh1_kg.10_#_6321_#_TRINITY_DN9607_c0_g1_i4	PF00378; PF00378	Enoyl-CoA hydratase/isomerase; Enoyl-CoA hydratase/isomerase	IPR001753; IPR001753	Enoyl-CoA hydratase/isomerase; Enoyl-CoA hydratase/isomerase
jgi|Krisp1|2621764|fgenesh1_kg.10_#_6399_#_TRINITY_DN5160_c0_g2_i7; jgi|Krisp1|2790518|estExt_fgenesh1_pg.C_10_t20184	PF00172, PF04082; PF00172, PF04082	Fungal Zn(2)-Cys(6) binuclear cluster domain, Fungal specific transcription factor domain; Fungal Zn(2)-Cys(6) binuclear cluster domain, Fungal specific transcription factor domain	IPR001138, IPR007219; IPR001138, IPR007219	Zn(2)Cys(6) fungal-type DNA-binding domain, Transcription factor domain, fungi; Zn(2)Cys(6) fungal-type DNA-binding domain, Transcription factor domain, fungi
jgi|Krisp1|2627132|fgenesh1_kg.12_#_88_#_TRINITY_DN179_c0_g1_i10; jgi|Krisp1|2665602|fgenesh1_kg.23_#_40_#_TRINITY_DN179_c0_g1_i4	PF05192, PF05190; PF05192, PF05190	MutS domain III, MutS family domain IV; MutS domain III, MutS family domain IV	IPR007696, IPR007861; IPR007696, IPR007861	DNA mismatch repair protein MutS, core, DNA mismatch repair protein MutS, clamp; DNA mismatch repair protein MutS, core, DNA mismatch repair protein MutS, clamp
jgi|Krisp1|2628570|fgenesh1_kg.12_#_1526_#_TRINITY_DN747_c1_g1_i13; jgi|Krisp1|2676366|fgenesh1_kg.30_#_399_#_TRINITY_DN747_c1_g1_i13; jgi|Krisp1|2641368|fgenesh1_kg.15_#_259_#_TRINITY_DN747_c1_g1_i13
jgi|Krisp1|2632243|fgenesh1_kg.12_#_5199_#_TRINITY_DN6588_c1_g1_i2; jgi|Krisp1|2678466|fgenesh1_kg.32_#_686_#_TRINITY_DN6588_c1_g1_i1
jgi|Krisp1|2632251|fgenesh1_kg.12_#_5207_#_TRINITY_DN7648_c1_g1_i6; jgi|Krisp1|2672379|fgenesh1_kg.26_#_1352_#_TRINITY_DN7648_c1_g1_i6	PF07876; PF07876	Stress responsive A/B Barrel Domain; Stress responsive A/B Barrel Domain	IPR013097; IPR013097	Stress responsive alpha-beta barrel; Stress responsive alpha-beta barrel
jgi|Krisp1|2632261|fgenesh1_kg.12_#_5217_#_TRINITY_DN784_c0_g1_i4; jgi|Krisp1|2672368|fgenesh1_kg.26_#_1341_#_TRINITY_DN784_c0_g1_i4
jgi|Krisp1|2632273|fgenesh1_kg.12_#_5229_#_TRINITY_DN3000_c0_g1_i1; jgi|Krisp1|2672356|fgenesh1_kg.26_#_1329_#_TRINITY_DN3000_c0_g1_i1	PF00295; PF00295	Glycosyl hydrolases family 28; Glycosyl hydrolases family 28	IPR000743; IPR000743	Glycoside hydrolase, family 28; Glycoside hydrolase, family 28
jgi|Krisp1|2632280|fgenesh1_kg.12_#_5236_#_TRINITY_DN9055_c0_g2_i17; jgi|Krisp1|2672343|fgenesh1_kg.26_#_1316_#_TRINITY_DN9055_c0_g2_i11	PF00535; PF00535	Glycosyl transferase family 2; Glycosyl transferase family 2	IPR001173; IPR001173	Glycosyltransferase 2-like; Glycosyltransferase 2-like
jgi|Krisp1|2632291|fgenesh1_kg.12_#_5247_#_TRINITY_DN5626_c1_g2_i1; jgi|Krisp1|2672339|fgenesh1_kg.26_#_1312_#_TRINITY_DN5626_c1_g2_i1
jgi|Krisp1|2632300|fgenesh1_kg.12_#_5256_#_TRINITY_DN6493_c0_g1_i6; jgi|Krisp1|2672330|fgenesh1_kg.26_#_1303_#_TRINITY_DN6493_c0_g1_i6	PF00400; PF00400	WD domain, G-beta repeat; WD domain, G-beta repeat	IPR001680; IPR001680	WD40 repeat; WD40 repeat
jgi|Krisp1|2632335|fgenesh1_kg.12_#_5291_#_TRINITY_DN1630_c0_g1_i5; jgi|Krisp1|2672295|fgenesh1_kg.26_#_1268_#_TRINITY_DN1630_c0_g1_i5	PF00107, PF08240; PF00107, PF08240	Zinc-binding dehydrogenase, Alcohol dehydrogenase GroES-like domain; Zinc-binding dehydrogenase, Alcohol dehydrogenase GroES-like domain	IPR013149, IPR013154; IPR013149, IPR013154	Alcohol dehydrogenase-like, C-terminal, Alcohol dehydrogenase-like, N-terminal; Alcohol dehydrogenase-like, C-terminal, Alcohol dehydrogenase-like, N-terminal
jgi|Krisp1|2632337|fgenesh1_kg.12_#_5293_#_TRINITY_DN8509_c0_g1_i17; jgi|Krisp1|2672286|fgenesh1_kg.26_#_1259_#_TRINITY_DN8509_c0_g1_i17	PF03399; PF03399	SAC3/GANP family; SAC3/GANP family	IPR005062; IPR005062	SAC3/GANP/THP3, conserved domain; SAC3/GANP/THP3, conserved domain
jgi|Krisp1|2632346|fgenesh1_kg.12_#_5302_#_TRINITY_DN599_c0_g1_i64; jgi|Krisp1|2672277|fgenesh1_kg.26_#_1250_#_TRINITY_DN599_c0_g1_i64	PF00285; PF00285	Citrate synthase, C-terminal domain; Citrate synthase, C-terminal domain	IPR002020; IPR002020	Citrate synthase; Citrate synthase
jgi|Krisp1|2632363|fgenesh1_kg.12_#_5319_#_TRINITY_DN964_c1_g1_i6; jgi|Krisp1|2672261|fgenesh1_kg.26_#_1234_#_TRINITY_DN964_c1_g1_i6
jgi|Krisp1|2632369|fgenesh1_kg.12_#_5325_#_TRINITY_DN489_c0_g1_i7; jgi|Krisp1|2672251|fgenesh1_kg.26_#_1224_#_TRINITY_DN489_c0_g1_i7
jgi|Krisp1|2632381|fgenesh1_kg.12_#_5337_#_TRINITY_DN161_c0_g2_i8; jgi|Krisp1|2858279|MIX60984_1967_11	PF03733, PF01699; PF03733, PF01699	Inner membrane component domain, Sodium/calcium exchanger protein; Inner membrane component domain, Sodium/calcium exchanger protein	IPR005185, IPR004837; IPR005185, IPR004837	Inner membrane component domain, Sodium/calcium exchanger membrane region; Inner membrane component domain, Sodium/calcium exchanger membrane region
jgi|Krisp1|2632410|fgenesh1_kg.12_#_5366_#_TRINITY_DN3379_c2_g1_i1; jgi|Krisp1|2672228|fgenesh1_kg.26_#_1201_#_TRINITY_DN3379_c2_g1_i2
jgi|Krisp1|2638003|fgenesh1_kg.14_#_834_#_TRINITY_DN6723_c0_g4_i1; jgi|Krisp1|2638032|fgenesh1_kg.14_#_863_#_TRINITY_DN6723_c0_g4_i1
jgi|Krisp1|2638428|fgenesh1_kg.14_#_1259_#_TRINITY_DN3397_c0_g1_i12; jgi|Krisp1|2767312|fgenesh1_pm.15_#_93	PF01000, PF01193; PF01000, PF01193	RNA polymerase Rpb3/RpoA insert domain, RNA polymerase Rpb3/Rpb11 dimerisation domain; RNA polymerase Rpb3/RpoA insert domain, RNA polymerase Rpb3/Rpb11 dimerisation domain	IPR011262, IPR011263; IPR011262, IPR011263	DNA-directed RNA polymerase, insert domain, DNA-directed RNA polymerase, RpoA/D/Rpb3-type; DNA-directed RNA polymerase, insert domain, DNA-directed RNA polymerase, RpoA/D/Rpb3-type
jgi|Krisp1|2638433|fgenesh1_kg.14_#_1264_#_TRINITY_DN5351_c0_g1_i1; jgi|Krisp1|2642739|fgenesh1_kg.15_#_1630_#_TRINITY_DN5351_c0_g1_i3	PF00347; PF00347	Ribosomal protein L6; Ribosomal protein L6	IPR020040; IPR020040	Large ribosomal subunit protein uL6, alpha-beta domain; Large ribosomal subunit protein uL6, alpha-beta domain
jgi|Krisp1|2638440|fgenesh1_kg.14_#_1271_#_TRINITY_DN6339_c0_g1_i24; jgi|Krisp1|2642729|fgenesh1_kg.15_#_1620_#_TRINITY_DN6339_c0_g1_i24	PF00153; PF00153	Mitochondrial carrier protein; Mitochondrial carrier protein	IPR018108; IPR018108	Mitochondrial substrate/solute carrier; Mitochondrial substrate/solute carrier
jgi|Krisp1|2638448|fgenesh1_kg.14_#_1279_#_TRINITY_DN3717_c1_g1_i1; jgi|Krisp1|2642721|fgenesh1_kg.15_#_1612_#_TRINITY_DN3717_c1_g1_i1	PF03109; PF03109	ABC1 atypical kinase-like domain; ABC1 atypical kinase-like domain	IPR004147; IPR004147	ABC1 atypical kinase-like domain; ABC1 atypical kinase-like domain
jgi|Krisp1|2638460|fgenesh1_kg.14_#_1291_#_TRINITY_DN467_c1_g1_i15; jgi|Krisp1|2642708|fgenesh1_kg.15_#_1599_#_TRINITY_DN467_c1_g1_i15	PF03556, PF14555; PF14555, PF03556	Cullin binding, UBA-like domain; UBA-like domain, Cullin binding	IPR005176, -; -, IPR005176	Potentiating neddylation domain, -; -, Potentiating neddylation domain
jgi|Krisp1|2638470|fgenesh1_kg.14_#_1301_#_TRINITY_DN467_c0_g1_i4; jgi|Krisp1|2642699|fgenesh1_kg.15_#_1590_#_TRINITY_DN467_c0_g1_i2	PF06395, PF00621, PF00564, PF15411; PF06395, PF00621, PF15411, PF00564	CDC24 Calponin, RhoGEF domain, PB1 domain, Pleckstrin homology domain; CDC24 Calponin, RhoGEF domain, Pleckstrin homology domain, PB1 domain	IPR010481, IPR000219, IPR000270, -; IPR010481, IPR000219, -, IPR000270	Cdc24/Scd1, N-terminal, Dbl homology (DH) domain, PB1 domain, -; Cdc24/Scd1, N-terminal, Dbl homology (DH) domain, -, PB1 domain
jgi|Krisp1|2638481|fgenesh1_kg.14_#_1312_#_TRINITY_DN4828_c0_g1_i12; jgi|Krisp1|2767318|fgenesh1_pm.15_#_99	PF01775; PF01775	Ribosomal proteins 50S-L18Ae/60S-L20/60S-L18A; Ribosomal proteins 50S-L18Ae/60S-L20/60S-L18A	IPR023573; IPR023573	Large ribosomal subunit protein eL20 domain; Large ribosomal subunit protein eL20 domain
jgi|Krisp1|2638490|fgenesh1_kg.14_#_1321_#_TRINITY_DN7227_c0_g1_i7; jgi|Krisp1|2642796|fgenesh1_kg.15_#_1687_#_TRINITY_DN7227_c0_g1_i7	PF09769; PF09769	Apolipoprotein O; Apolipoprotein O	IPR019166; IPR019166	MICOS complex subunit MIC26/MIC27; MICOS complex subunit MIC26/MIC27
jgi|Krisp1|2638496|fgenesh1_kg.14_#_1327_#_TRINITY_DN7092_c0_g1_i1; jgi|Krisp1|2642792|fgenesh1_kg.15_#_1683_#_TRINITY_DN7092_c0_g1_i1	PF04729; PF04729	ASF1 like histone chaperone; ASF1 like histone chaperone	IPR006818; IPR006818	Histone chaperone ASF1-like; Histone chaperone ASF1-like
jgi|Krisp1|2638505|fgenesh1_kg.14_#_1336_#_TRINITY_DN5025_c0_g1_i21; jgi|Krisp1|2642786|fgenesh1_kg.15_#_1677_#_TRINITY_DN5025_c0_g1_i16	PF01909, PF03828; PF03828, PF01909	Nucleotidyltransferase domain, Cid1 family poly A polymerase; Cid1 family poly A polymerase, Nucleotidyltransferase domain	IPR002934, IPR002058; IPR002058, IPR002934	Polymerase, nucleotidyl transferase domain, PAP/25A-associated; PAP/25A-associated, Polymerase, nucleotidyl transferase domain
jgi|Krisp1|2638534|fgenesh1_kg.14_#_1365_#_TRINITY_DN284_c0_g1_i13; jgi|Krisp1|2642756|fgenesh1_kg.15_#_1647_#_TRINITY_DN284_c0_g1_i13	PF02373; PF02373	JmjC domain, hydroxylase; JmjC domain, hydroxylase	IPR003347; IPR003347	JmjC domain; JmjC domain
jgi|Krisp1|2638541|fgenesh1_kg.14_#_1372_#_TRINITY_DN6523_c0_g1_i19; jgi|Krisp1|2642746|fgenesh1_kg.15_#_1637_#_TRINITY_DN6523_c0_g1_i19	PF10294; PF10294	Lysine methyltransferase; Lysine methyltransferase	IPR019410; IPR019410	Lysine methyltransferase; Lysine methyltransferase
jgi|Krisp1|2639148|fgenesh1_kg.14_#_1979_#_TRINITY_DN6569_c0_g1_i27; jgi|Krisp1|2643475|fgenesh1_kg.15_#_2366_#_TRINITY_DN6569_c0_g1_i19; jgi|Krisp1|2639207|fgenesh1_kg.14_#_2038_#_TRINITY_DN6569_c0_g1_i27	PF00903; PF00903; PF00903	Glyoxalase/Bleomycin resistance protein/Dioxygenase superfamily; Glyoxalase/Bleomycin resistance protein/Dioxygenase superfamily; Glyoxalase/Bleomycin resistance protein/Dioxygenase superfamily	IPR004360; IPR004360; IPR004360	Glyoxalase/fosfomycin resistance/dioxygenase domain; Glyoxalase/fosfomycin resistance/dioxygenase domain; Glyoxalase/fosfomycin resistance/dioxygenase domain
jgi|Krisp1|2639216|fgenesh1_kg.14_#_2047_#_TRINITY_DN511_c0_g1_i1; jgi|Krisp1|2886052|MIX88757_1908_65	PF13193, PF00501; PF00501, PF13193	AMP-binding enzyme C-terminal domain, AMP-binding enzyme; AMP-binding enzyme, AMP-binding enzyme C-terminal domain	IPR025110, IPR000873; IPR000873, IPR025110	AMP-binding enzyme, C-terminal domain, AMP-dependent synthetase/ligase domain; AMP-dependent synthetase/ligase domain, AMP-binding enzyme, C-terminal domain
jgi|Krisp1|2639931|fgenesh1_kg.14_#_2762_#_TRINITY_DN1943_c0_g1_i5; jgi|Krisp1|2644522|fgenesh1_kg.15_#_3413_#_TRINITY_DN1943_c0_g1_i5	PF02953; PF02953	Tim10/DDP family zinc finger; Tim10/DDP family zinc finger	IPR004217; IPR004217	Tim10-like; Tim10-like
jgi|Krisp1|2639960|fgenesh1_kg.14_#_2791_#_TRINITY_DN2438_c2_g1_i11; jgi|Krisp1|2644496|fgenesh1_kg.15_#_3387_#_TRINITY_DN2438_c2_g1_i11
jgi|Krisp1|2639970|fgenesh1_kg.14_#_2801_#_TRINITY_DN2858_c0_g1_i1; jgi|Krisp1|2644485|fgenesh1_kg.15_#_3376_#_TRINITY_DN2858_c0_g1_i1	PF08651; PF08651	DASH complex subunit Duo1; DASH complex subunit Duo1	IPR013960; IPR013960	DASH complex subunit Duo1; DASH complex subunit Duo1
jgi|Krisp1|2639983|fgenesh1_kg.14_#_2814_#_TRINITY_DN214_c0_g2_i3; jgi|Krisp1|2644468|fgenesh1_kg.15_#_3359_#_TRINITY_DN214_c0_g2_i3	PF16212, PF00702, PF13246, PF00122, PF16209; PF00122, PF16212, PF00702, PF13246, PF16209	Phospholipid-translocating P-type ATPase C-terminal, haloacid dehalogenase-like hydrolase, Cation transport ATPase (P-type), E1-E2 ATPase, Phospholipid-translocating ATPase N-terminal; E1-E2 ATPase, Phospholipid-translocating P-type ATPase C-terminal, haloacid dehalogenase-like hydrolase, Cation transport ATPase (P-type), Phospholipid-translocating ATPase N-terminal	IPR032630, -, -, -, IPR032631; -, IPR032630, -, -, IPR032631	P-type ATPase, C-terminal, -, -, -, P-type ATPase, N-terminal; -, P-type ATPase, C-terminal, -, -, P-type ATPase, N-terminal
jgi|Krisp1|2639993|fgenesh1_kg.14_#_2824_#_TRINITY_DN6993_c0_g1_i1; jgi|Krisp1|2644461|fgenesh1_kg.15_#_3352_#_TRINITY_DN6993_c0_g1_i4
jgi|Krisp1|2640006|fgenesh1_kg.14_#_2837_#_TRINITY_DN5822_c0_g1_i2; jgi|Krisp1|2644449|fgenesh1_kg.15_#_3340_#_TRINITY_DN5822_c0_g1_i2
jgi|Krisp1|2640022|fgenesh1_kg.14_#_2853_#_TRINITY_DN5465_c0_g2_i2; jgi|Krisp1|2644433|fgenesh1_kg.15_#_3324_#_TRINITY_DN5465_c0_g2_i2	PF13911; PF13911	AhpC/TSA antioxidant enzyme; AhpC/TSA antioxidant enzyme	IPR032801; IPR032801	Peroxiredoxin-like 2A/B/C; Peroxiredoxin-like 2A/B/C
jgi|Krisp1|2640054|fgenesh1_kg.14_#_2885_#_TRINITY_DN8118_c0_g1_i4; jgi|Krisp1|2644397|fgenesh1_kg.15_#_3288_#_TRINITY_DN8118_c0_g1_i4	PF04387; PF04387	Protein tyrosine phosphatase-like protein, PTPLA; Protein tyrosine phosphatase-like protein, PTPLA	IPR007482; IPR007482	Protein-tyrosine phosphatase-like, PTPLA; Protein-tyrosine phosphatase-like, PTPLA
jgi|Krisp1|2640069|fgenesh1_kg.14_#_2900_#_TRINITY_DN5068_c0_g2_i5; jgi|Krisp1|2644383|fgenesh1_kg.15_#_3274_#_TRINITY_DN5068_c0_g2_i5	PF06428; PF06428	GDP/GTP exchange factor Sec2p; GDP/GTP exchange factor Sec2p	IPR009449; IPR009449	GDP/GTP exchange factor Sec2, N-terminal; GDP/GTP exchange factor Sec2, N-terminal
jgi|Krisp1|2640091|fgenesh1_kg.14_#_2922_#_TRINITY_DN3199_c0_g1_i15; jgi|Krisp1|2644362|fgenesh1_kg.15_#_3253_#_TRINITY_DN3199_c0_g1_i15
jgi|Krisp1|2640105|fgenesh1_kg.14_#_2936_#_TRINITY_DN2175_c2_g1_i4; jgi|Krisp1|2644349|fgenesh1_kg.15_#_3240_#_TRINITY_DN2175_c2_g1_i4	PF04419; PF04419	Small EDRK-rich factor 1/2-like, N-terminal; Small EDRK-rich factor 1/2-like, N-terminal	IPR007513; IPR007513	Small EDRK-rich factor-like, N-terminal; Small EDRK-rich factor-like, N-terminal
jgi|Krisp1|2640124|fgenesh1_kg.14_#_2955_#_TRINITY_DN5384_c0_g1_i15; jgi|Krisp1|2644329|fgenesh1_kg.15_#_3220_#_TRINITY_DN5384_c0_g1_i15	PF01073; PF01073	3-beta hydroxysteroid dehydrogenase/isomerase family; 3-beta hydroxysteroid dehydrogenase/isomerase family	IPR002225; IPR002225	3-beta hydroxysteroid dehydrogenase/isomerase; 3-beta hydroxysteroid dehydrogenase/isomerase
jgi|Krisp1|2640129|fgenesh1_kg.14_#_2960_#_TRINITY_DN4116_c0_g1_i4; jgi|Krisp1|2644324|fgenesh1_kg.15_#_3215_#_TRINITY_DN4116_c0_g1_i3
jgi|Krisp1|2641281|fgenesh1_kg.15_#_172_#_TRINITY_DN372_c0_g1_i9; jgi|Krisp1|2679113|fgenesh1_kg.33_#_642_#_TRINITY_DN372_c0_g1_i9
jgi|Krisp1|2642923|fgenesh1_kg.15_#_1814_#_TRINITY_DN2565_c0_g1_i2; jgi|Krisp1|2642992|fgenesh1_kg.15_#_1883_#_TRINITY_DN2565_c0_g1_i4	PF12937; PF12937	F-box-like; F-box-like	IPR001810; IPR001810	F-box domain; F-box domain
jgi|Krisp1|2644510|fgenesh1_kg.15_#_3401_#_TRINITY_DN5329_c0_g1_i3; jgi|Krisp1|2826937|MIX29642_9461_24	PF14700, PF00940; PF00940, PF14700	DNA-directed RNA polymerase N-terminal, DNA-dependent RNA polymerase; DNA-dependent RNA polymerase, DNA-directed RNA polymerase N-terminal	IPR029262, IPR046950; IPR046950, IPR029262	DNA-directed RNA polymerase, N-terminal, DNA-directed RNA polymerase, C-terminal domain, phage-type; DNA-directed RNA polymerase, C-terminal domain, phage-type, DNA-directed RNA polymerase, N-terminal
jgi|Krisp1|2644689|fgenesh1_kg.15_#_3580_#_TRINITY_DN847_c0_g1_i7; jgi|Krisp1|2678605|fgenesh1_kg.33_#_134_#_TRINITY_DN847_c0_g1_i7	PF02046; PF02046	Cytochrome c oxidase subunit VIa; Cytochrome c oxidase subunit VIa	IPR001349; IPR001349	Cytochrome c oxidase, subunit VIa; Cytochrome c oxidase, subunit VIa
jgi|Krisp1|2644756|fgenesh1_kg.15_#_3647_#_TRINITY_DN6236_c0_g1_i11; jgi|Krisp1|2678664|fgenesh1_kg.33_#_193_#_TRINITY_DN6236_c0_g1_i11	PF01937; PF01937	Damage-control phosphatase ARMT1-like domain; Damage-control phosphatase ARMT1-like domain	IPR002791; IPR002791	Damage-control phosphatase ARMT1-like, metal-binding domain; Damage-control phosphatase ARMT1-like, metal-binding domain
jgi|Krisp1|2644805|fgenesh1_kg.15_#_3696_#_TRINITY_DN2377_c1_g1_i8; jgi|Krisp1|2678709|fgenesh1_kg.33_#_238_#_TRINITY_DN2377_c1_g1_i8	PF00026; PF00026	Eukaryotic aspartyl protease; Eukaryotic aspartyl protease	IPR033121; IPR033121	Peptidase family A1 domain; Peptidase family A1 domain
jgi|Krisp1|2644842|fgenesh1_kg.15_#_3733_#_TRINITY_DN312_c1_g1_i25; jgi|Krisp1|2678746|fgenesh1_kg.33_#_275_#_TRINITY_DN312_c1_g1_i25	PF00163, PF01479; PF00163, PF01479	Ribosomal protein S4/S9 N-terminal domain, S4 domain; Ribosomal protein S4/S9 N-terminal domain, S4 domain	IPR001912, IPR002942; IPR001912, IPR002942	Small ribosomal subunit protein uS4, N-terminal, RNA-binding S4 domain; Small ribosomal subunit protein uS4, N-terminal, RNA-binding S4 domain
jgi|Krisp1|2647280|fgenesh1_kg.16_#_2310_#_TRINITY_DN12033_c1_g1_i66; jgi|Krisp1|2713874|gm4.4970_g	; PF03330	; Lytic transglycolase	; IPR009009	; RlpA-like protein, double-psi beta-barrel domain
jgi|Krisp1|2647793|fgenesh1_kg.16_#_2823_#_TRINITY_DN9404_c0_g2_i1; jgi|Krisp1|2647866|fgenesh1_kg.16_#_2896_#_TRINITY_DN9404_c0_g2_i1	PF04303; PF04303	PrpF protein; PrpF protein	IPR007400; IPR007400	PrpF-like; PrpF-like
jgi|Krisp1|2647801|fgenesh1_kg.16_#_2831_#_TRINITY_DN6080_c0_g1_i4; jgi|Krisp1|2647859|fgenesh1_kg.16_#_2889_#_TRINITY_DN6080_c0_g1_i4
jgi|Krisp1|2647805|fgenesh1_kg.16_#_2835_#_TRINITY_DN9513_c0_g1_i4; jgi|Krisp1|2647856|fgenesh1_kg.16_#_2886_#_TRINITY_DN9513_c0_g1_i4
jgi|Krisp1|2647807|fgenesh1_kg.16_#_2837_#_TRINITY_DN1903_c0_g1_i47; jgi|Krisp1|2647853|fgenesh1_kg.16_#_2883_#_TRINITY_DN1903_c0_g1_i47
jgi|Krisp1|2655576|fgenesh1_kg.19_#_204_#_TRINITY_DN4733_c0_g1_i36; jgi|Krisp1|2655628|fgenesh1_kg.19_#_256_#_TRINITY_DN4733_c0_g1_i36
jgi|Krisp1|2655968|fgenesh1_kg.19_#_596_#_TRINITY_DN380_c0_g2_i6; jgi|Krisp1|2670121|fgenesh1_kg.25_#_749_#_TRINITY_DN380_c0_g2_i6	PF03169; PF03169	OPT oligopeptide transporter protein; OPT oligopeptide transporter protein	IPR004813; IPR004813	Oligopeptide transporter, OPT superfamily; Oligopeptide transporter, OPT superfamily
jgi|Krisp1|2656304|fgenesh1_kg.19_#_932_#_TRINITY_DN3507_c0_g1_i10; jgi|Krisp1|2779949|estExt_fgenesh1_pm.C_330009	PF03676; PF03676	Phagosome assembly factor 1; Phagosome assembly factor 1	IPR005373; IPR005373	Phagosome assembly factor 1; Phagosome assembly factor 1
jgi|Krisp1|2656345|fgenesh1_kg.19_#_973_#_TRINITY_DN6746_c0_g1_i5; jgi|Krisp1|2656394|fgenesh1_kg.19_#_1022_#_TRINITY_DN6746_c0_g1_i6	PF01585; PF01585	G-patch domain; G-patch domain	IPR000467; IPR000467	G-patch domain; G-patch domain
jgi|Krisp1|2657032|fgenesh1_kg.19_#_1660_#_TRINITY_DN1188_c0_g1_i1; jgi|Krisp1|2657096|fgenesh1_kg.19_#_1724_#_TRINITY_DN1188_c0_g1_i24
jgi|Krisp1|2661493|fgenesh1_kg.21_#_767_#_TRINITY_DN707_c2_g2_i10; jgi|Krisp1|2667348|fgenesh1_kg.23_#_1786_#_TRINITY_DN707_c2_g2_i10	PF08161; PF08161	Ribosomal RNA-processing protein 12, HEAT repeats; Ribosomal RNA-processing protein 12, HEAT repeats	IPR012978; IPR012978	Ribosomal RNA-processing protein 12-like, conserved domain; Ribosomal RNA-processing protein 12-like, conserved domain
jgi|Krisp1|2661504|fgenesh1_kg.21_#_778_#_TRINITY_DN10641_c0_g2_i19; jgi|Krisp1|2667360|fgenesh1_kg.23_#_1798_#_TRINITY_DN10641_c0_g2_i19
jgi|Krisp1|2661836|fgenesh1_kg.21_#_1110_#_TRINITY_DN8758_c0_g1_i4; jgi|Krisp1|2667023|fgenesh1_kg.23_#_1461_#_TRINITY_DN8758_c0_g1_i3
jgi|Krisp1|2662132|fgenesh1_kg.21_#_1406_#_TRINITY_DN7462_c0_g1_i9; jgi|Krisp1|2666643|fgenesh1_kg.23_#_1081_#_TRINITY_DN7462_c0_g1_i17
jgi|Krisp1|2662143|fgenesh1_kg.21_#_1417_#_TRINITY_DN1336_c1_g1_i9; jgi|Krisp1|2666654|fgenesh1_kg.23_#_1092_#_TRINITY_DN1336_c1_g1_i9
jgi|Krisp1|2662145|fgenesh1_kg.21_#_1419_#_TRINITY_DN4086_c1_g1_i7; jgi|Krisp1|2666656|fgenesh1_kg.23_#_1094_#_TRINITY_DN4086_c1_g1_i7	PF01048; PF01048	Phosphorylase superfamily; Phosphorylase superfamily	IPR000845; IPR000845	Nucleoside phosphorylase domain; Nucleoside phosphorylase domain
jgi|Krisp1|2662150|fgenesh1_kg.21_#_1424_#_TRINITY_DN4086_c0_g1_i6; jgi|Krisp1|2666663|fgenesh1_kg.23_#_1101_#_TRINITY_DN4086_c0_g1_i7
jgi|Krisp1|2662539|fgenesh1_kg.21_#_1813_#_TRINITY_DN2733_c0_g1_i8; jgi|Krisp1|2666287|fgenesh1_kg.23_#_725_#_TRINITY_DN2733_c0_g1_i8	PF01294; PF01294	Ribosomal protein L13e; Ribosomal protein L13e	IPR001380; IPR001380	Large ribosomal subunit protein eL13; Large ribosomal subunit protein eL13
jgi|Krisp1|2662543|fgenesh1_kg.21_#_1817_#_TRINITY_DN1568_c1_g1_i1; jgi|Krisp1|2666289|fgenesh1_kg.23_#_727_#_TRINITY_DN1568_c1_g1_i1	PF00203; PF00203	Ribosomal protein S19; Ribosomal protein S19	IPR002222; IPR002222	Small ribosomal subunit protein uS19; Small ribosomal subunit protein uS19
jgi|Krisp1|2662662|fgenesh1_kg.21_#_1936_#_TRINITY_DN8588_c0_g1_i1; jgi|Krisp1|2666104|fgenesh1_kg.23_#_542_#_TRINITY_DN8588_c0_g1_i1
jgi|Krisp1|2662663|fgenesh1_kg.21_#_1937_#_TRINITY_DN20167_c0_g1_i1; jgi|Krisp1|2666105|fgenesh1_kg.23_#_543_#_TRINITY_DN20167_c0_g1_i1	PF02900; PF02900	Catalytic LigB subunit of aromatic ring-opening dioxygenase; Catalytic LigB subunit of aromatic ring-opening dioxygenase	IPR004183; IPR004183	Extradiol ring-cleavage dioxygenase, class III enzyme, subunit B; Extradiol ring-cleavage dioxygenase, class III enzyme, subunit B
jgi|Krisp1|2662818|fgenesh1_kg.21_#_2092_#_TRINITY_DN7958_c0_g1_i2; jgi|Krisp1|2665905|fgenesh1_kg.23_#_343_#_TRINITY_DN7958_c0_g1_i2	PF09805; PF09805	Nucleolar protein 12 (25kDa); Nucleolar protein 12 (25kDa)	IPR019186; IPR019186	Nucleolar protein 12; Nucleolar protein 12
jgi|Krisp1|2662824|fgenesh1_kg.21_#_2098_#_TRINITY_DN1538_c0_g1_i3; jgi|Krisp1|2665907|fgenesh1_kg.23_#_345_#_TRINITY_DN1538_c0_g1_i3	PF01189; PF01189	16S rRNA methyltransferase RsmB/F; 16S rRNA methyltransferase RsmB/F	IPR049560; IPR049560	SAM-dependent methyltransferase RsmB-F/NOP2-type, catalytic core; SAM-dependent methyltransferase RsmB-F/NOP2-type, catalytic core
jgi|Krisp1|2662834|fgenesh1_kg.21_#_2108_#_TRINITY_DN5579_c0_g1_i1; jgi|Krisp1|2665919|fgenesh1_kg.23_#_357_#_TRINITY_DN5579_c0_g1_i1
jgi|Krisp1|2662847|fgenesh1_kg.21_#_2121_#_TRINITY_DN3504_c0_g1_i3; jgi|Krisp1|2665933|fgenesh1_kg.23_#_371_#_TRINITY_DN3504_c0_g1_i3	PF00069, PF12330, PF00433; PF00069, PF12330, PF00433	Protein kinase domain, Haspin like kinase domain, Protein kinase C terminal domain; Protein kinase domain, Haspin like kinase domain, Protein kinase C terminal domain	IPR000719, -, IPR017892; IPR000719, -, IPR017892	Protein kinase domain, -, Protein kinase, C-terminal; Protein kinase domain, -, Protein kinase, C-terminal
jgi|Krisp1|2662852|fgenesh1_kg.21_#_2126_#_TRINITY_DN9370_c0_g2_i1; jgi|Krisp1|2665936|fgenesh1_kg.23_#_374_#_TRINITY_DN9370_c0_g2_i1	PF00153; PF00153	Mitochondrial carrier protein; Mitochondrial carrier protein	IPR018108; IPR018108	Mitochondrial substrate/solute carrier; Mitochondrial substrate/solute carrier
jgi|Krisp1|2667749|fgenesh1_kg.24_#_179_#_TRINITY_DN3022_c0_g1_i2; jgi|Krisp1|2667858|fgenesh1_kg.24_#_288_#_TRINITY_DN3022_c0_g1_i2
jgi|Krisp1|2668601|fgenesh1_kg.24_#_1031_#_TRINITY_DN1702_c0_g1_i1; jgi|Krisp1|2668718|fgenesh1_kg.24_#_1148_#_TRINITY_DN1702_c0_g1_i4	PF18511; PF18511	F-box; F-box	IPR041567; IPR041567	COI1, F-box; COI1, F-box
jgi|Krisp1|2671248|fgenesh1_kg.26_#_221_#_TRINITY_DN8314_c0_g2_i10; jgi|Krisp1|2671366|fgenesh1_kg.26_#_339_#_TRINITY_DN8314_c0_g2_i10	PF00676; PF00676	Dehydrogenase E1 component; Dehydrogenase E1 component	IPR001017; IPR001017	Dehydrogenase, E1 component; Dehydrogenase, E1 component
jgi|Krisp1|2672124|fgenesh1_kg.26_#_1097_#_TRINITY_DN7341_c0_g1_i12; jgi|Krisp1|2673598|fgenesh1_kg.27_#_1218_#_TRINITY_DN7341_c0_g1_i41	PF01246; PF01246	Ribosomal protein L24e; Ribosomal protein L24e	IPR000988; IPR000988	Large ribosomal subunit protein eL24-related; Large ribosomal subunit protein eL24-related
jgi|Krisp1|2679931|fgenesh1_kg.35_#_254_#_TRINITY_DN4618_c0_g1_i11; jgi|Krisp1|2681053|fgenesh1_kg.38_#_263_#_TRINITY_DN4618_c0_g1_i11	PF06414; PF06414	Zeta toxin; Zeta toxin	IPR010488; IPR010488	Zeta toxin domain; Zeta toxin domain
jgi|Krisp1|2679940|fgenesh1_kg.35_#_263_#_TRINITY_DN4402_c0_g1_i6; jgi|Krisp1|2681049|fgenesh1_kg.38_#_259_#_TRINITY_DN4402_c0_g1_i4
jgi|Krisp1|2679947|fgenesh1_kg.35_#_270_#_TRINITY_DN3429_c0_g1_i2; jgi|Krisp1|2681042|fgenesh1_kg.38_#_252_#_TRINITY_DN3429_c0_g1_i2	PF04568; PF04568	Mitochondrial ATPase inhibitor, IATP; Mitochondrial ATPase inhibitor, IATP	IPR007648; IPR007648	Mitochondrial ATPase inhibitor; Mitochondrial ATPase inhibitor
jgi|Krisp1|2679959|fgenesh1_kg.35_#_282_#_TRINITY_DN11830_c1_g1_i36; jgi|Krisp1|2681031|fgenesh1_kg.38_#_241_#_TRINITY_DN11830_c1_g1_i31
jgi|Krisp1|2680008|fgenesh1_kg.35_#_331_#_TRINITY_DN950_c0_g1_i21; jgi|Krisp1|2680984|fgenesh1_kg.38_#_194_#_TRINITY_DN950_c0_g1_i21
jgi|Krisp1|2680017|fgenesh1_kg.35_#_340_#_TRINITY_DN6365_c0_g1_i6; jgi|Krisp1|2680975|fgenesh1_kg.38_#_185_#_TRINITY_DN6365_c0_g1_i6	PF04178; PF04178	Got1/Sft2-like family; Got1/Sft2-like family	IPR007305; IPR007305	Vesicle transport protein, Got1/SFT2-like; Vesicle transport protein, Got1/SFT2-like
jgi|Krisp1|2680026|fgenesh1_kg.35_#_349_#_TRINITY_DN1365_c1_g1_i6; jgi|Krisp1|2680967|fgenesh1_kg.38_#_177_#_TRINITY_DN1365_c1_g1_i10
jgi|Krisp1|2680086|fgenesh1_kg.35_#_409_#_TRINITY_DN1663_c1_g1_i8; jgi|Krisp1|2680950|fgenesh1_kg.38_#_160_#_TRINITY_DN1663_c1_g1_i8
jgi|Krisp1|2693671|estExt_Genewise1.C_5_t10422; jgi|Krisp1|2771351|estExt_fgenesh1_pm.C_2_t10369	PF05199, PF00732; PF05199, PF00732	GMC oxidoreductase, GMC oxidoreductase; GMC oxidoreductase, GMC oxidoreductase	IPR007867, IPR000172; IPR007867, IPR000172	Glucose-methanol-choline oxidoreductase, C-terminal, Glucose-methanol-choline oxidoreductase, N-terminal; Glucose-methanol-choline oxidoreductase, C-terminal, Glucose-methanol-choline oxidoreductase, N-terminal
jgi|Krisp1|2694570|estExt_Genewise1.C_5_t30326; jgi|Krisp1|2786479|estExt_fgenesh1_pg.C_5_t20448	PF19055, PF00005, PF01061; PF00005, PF01061, PF19055	ABC-2 type transporter, ABC transporter, ABC-2 type transporter; ABC transporter, ABC-2 type transporter, ABC-2 type transporter	IPR043926, IPR003439, IPR013525; IPR003439, IPR013525, IPR043926	ABC transporter family G domain, ABC transporter-like, ATP-binding domain, ABC-2 type transporter, transmembrane domain; ABC transporter-like, ATP-binding domain, ABC-2 type transporter, transmembrane domain, ABC transporter family G domain
jgi|Krisp1|2705007|estExt_Genewise1.C_210038; jgi|Krisp1|2761942|fgenesh1_pm.4_#_35	PF08625, PF00400; PF00400, PF08625	Utp13 specific WD40 associated domain, WD domain, G-beta repeat; WD domain, G-beta repeat, Utp13 specific WD40 associated domain	IPR013934, IPR001680; IPR001680, IPR013934	U3 small nucleolar RNA-associated protein 13, C-terminal, WD40 repeat; WD40 repeat, U3 small nucleolar RNA-associated protein 13, C-terminal
jgi|Krisp1|2709888|gm4.984_g; jgi|Krisp1|2709896|gm4.992_g
jgi|Krisp1|2710125|gm4.1221_g; jgi|Krisp1|2727334|gm4.18430_g
jgi|Krisp1|2710134|gm4.1230_g; jgi|Krisp1|2727326|gm4.18422_g
jgi|Krisp1|2710211|gm4.1307_g; jgi|Krisp1|2729664|gm4.20760_g
jgi|Krisp1|2710952|gm4.2048_g; jgi|Krisp1|2710959|gm4.2055_g	PF00240; PF00240	Ubiquitin family; Ubiquitin family	IPR000626; IPR000626	Ubiquitin-like domain; Ubiquitin-like domain
jgi|Krisp1|2711285|gm4.2381_g; jgi|Krisp1|2711318|gm4.2414_g	PF13561; PF13561	Enoyl-(Acyl carrier protein) reductase; Enoyl-(Acyl carrier protein) reductase	-; -	-; -
jgi|Krisp1|2711289|gm4.2385_g; jgi|Krisp1|2711314|gm4.2410_g
jgi|Krisp1|2712248|gm4.3344_g; jgi|Krisp1|2713868|gm4.4964_g
jgi|Krisp1|2712334|gm4.3430_g; jgi|Krisp1|2882967|MIX85672_590_98	PF13520; PF13520	Amino acid permease; Amino acid permease	IPR002293; IPR002293	Amino acid/polyamine transporter I; Amino acid/polyamine transporter I
jgi|Krisp1|2713481|gm4.4577_g; jgi|Krisp1|2713493|gm4.4589_g	PF01565; PF01565	FAD binding domain; FAD binding domain	IPR006094; IPR006094	FAD linked oxidase, N-terminal; FAD linked oxidase, N-terminal
jgi|Krisp1|2719365|gm4.10461_g; jgi|Krisp1|2722969|gm4.14065_g
jgi|Krisp1|2719376|gm4.10472_g; jgi|Krisp1|2744788|estExt_Genemark4.C_6_t30158	PF00230; PF00230	Major intrinsic protein; Major intrinsic protein	IPR000425; IPR000425	Major intrinsic protein; Major intrinsic protein
jgi|Krisp1|2720025|gm4.11121_g; jgi|Krisp1|2871702|MIX74407_2636_51
jgi|Krisp1|2720294|gm4.11390_g; jgi|Krisp1|2780738|estExt_fgenesh1_pg.C_1_t10431; jgi|Krisp1|2735324|estExt_Genemark4.C_1_t20127	PF13460; PF13460; PF13460	NAD(P)H-binding; NAD(P)H-binding; NAD(P)H-binding	IPR016040; IPR016040; IPR016040	NAD(P)-binding domain; NAD(P)-binding domain; NAD(P)-binding domain
jgi|Krisp1|2726497|gm4.17593_g; jgi|Krisp1|2751680|estExt_Genemark4.C_13_t20034	PF00724; PF00724	NADH:flavin oxidoreductase / NADH oxidase family; NADH:flavin oxidoreductase / NADH oxidase family	IPR001155; IPR001155	NADH:flavin oxidoreductase/NADH oxidase, N-terminal; NADH:flavin oxidoreductase/NADH oxidase, N-terminal
jgi|Krisp1|2727241|gm4.18337_g; jgi|Krisp1|2767405|fgenesh1_pm.15_#_186	PF00171; PF00171	Aldehyde dehydrogenase family; Aldehyde dehydrogenase family	IPR015590; IPR015590	Aldehyde dehydrogenase domain; Aldehyde dehydrogenase domain
jgi|Krisp1|2727306|gm4.18402_g; jgi|Krisp1|2803293|MIX5998_216_35	PF05368; PF05368	NmrA-like family; NmrA-like family	IPR008030; IPR008030	NmrA-like domain; NmrA-like domain
jgi|Krisp1|2727339|gm4.18435_g; jgi|Krisp1|2803155|MIX5860_422_57	PF00704; PF00704	Glycosyl hydrolases family 18; Glycosyl hydrolases family 18	IPR001223; IPR001223	Glycoside hydrolase family 18, catalytic domain; Glycoside hydrolase family 18, catalytic domain
jgi|Krisp1|2727665|gm4.18761_g; jgi|Krisp1|2727666|gm4.18762_g
jgi|Krisp1|2727956|gm4.19052_g; jgi|Krisp1|2826929|MIX29634_2759_63	PF00076; PF00076	RNA recognition motif; RNA recognition motif	IPR000504; IPR000504	RNA recognition motif domain; RNA recognition motif domain
jgi|Krisp1|2729797|gm4.20893_g; jgi|Krisp1|2737365|estExt_Genemark4.C_2_t10029	PF07690; PF07690	Major Facilitator Superfamily; Major Facilitator Superfamily	IPR011701; IPR011701	Major facilitator superfamily; Major facilitator superfamily
jgi|Krisp1|2730620|gm4.21716_g; jgi|Krisp1|2740843|estExt_Genemark4.C_4_t10025
jgi|Krisp1|2731983|gm4.23079_g; jgi|Krisp1|2809427|MIX12132_666_54	PF11999; PF11999	Ice-binding-like; Ice-binding-like	IPR021884; IPR021884	Ice-binding protein; Ice-binding protein
jgi|Krisp1|2735819|estExt_Genemark4.C_1_t30138; jgi|Krisp1|2752536|estExt_Genemark4.C_14_t20119	PF05462; PF05462	Slime mold cyclic AMP receptor; Slime mold cyclic AMP receptor	-; -	-; -
jgi|Krisp1|2736467|estExt_Genemark4.C_1_t40311; jgi|Krisp1|2737878|estExt_Genemark4.C_2_t20056	PF00364, PF01039, PF21385, PF00289, PF02786, PF08326, PF02785; PF01039, PF02785, PF00364, PF02786, PF08326, PF00289, PF21385	Biotin-requiring enzyme, Carboxyl transferase domain, Acetyl-CoA carboxylase, BT domain, Biotin carboxylase, N-terminal domain, Carbamoyl-phosphate synthase L chain, ATP binding domain, Acetyl-CoA carboxylase, central region, Biotin carboxylase C-terminal domain; Carboxyl transferase domain, Biotin carboxylase C-terminal domain, Biotin-requiring enzyme, Carbamoyl-phosphate synthase L chain, ATP b…	IPR000089, IPR034733, IPR049074, IPR005481, IPR005479, IPR013537, IPR005482; IPR034733, IPR005482, IPR000089, IPR005479, IPR013537, IPR005481, IPR049074	Biotin/lipoyl attachment, Acetyl-coenzyme A carboxylase carboxyl transferase subunit beta, Acetyl-CoA carboxylase, BT domain, Biotin carboxylase-like, N-terminal domain, Carbamoyl-phosphate synthetase large subunit-like, ATP-binding domain, Acetyl-CoA carboxylase, central domain, Biotin carboxylase, C-terminal; Acetyl-coenzyme A carboxylase carboxyl transferase subunit beta, Biotin carboxylase, C…
jgi|Krisp1|2736999|estExt_Genemark4.C_1_t50378; jgi|Krisp1|2737028|estExt_Genemark4.C_1_t50407
jgi|Krisp1|2737440|estExt_Genemark4.C_2_t10105; jgi|Krisp1|2744529|estExt_Genemark4.C_6_t20386	PF13520; PF13520	Amino acid permease; Amino acid permease	IPR002293; IPR002293	Amino acid/polyamine transporter I; Amino acid/polyamine transporter I
jgi|Krisp1|2737511|estExt_Genemark4.C_2_t10176; jgi|Krisp1|2743322|estExt_Genemark4.C_5_t30052	PF03169; PF03169	OPT oligopeptide transporter protein; OPT oligopeptide transporter protein	IPR004813; IPR004813	Oligopeptide transporter, OPT superfamily; Oligopeptide transporter, OPT superfamily
jgi|Krisp1|2738772|estExt_Genemark4.C_2_t30463; jgi|Krisp1|2796865|estExt_fgenesh1_pg.C_380007
jgi|Krisp1|2739131|estExt_Genemark4.C_2_t40346; jgi|Krisp1|2752449|estExt_Genemark4.C_14_t20026; jgi|Krisp1|2827186|MIX29891_432_89	PF01565, PF02913; PF01565, PF02913; PF01565, PF02913	FAD binding domain, FAD linked oxidases, C-terminal domain; FAD binding domain, FAD linked oxidases, C-terminal domain; FAD binding domain, FAD linked oxidases, C-terminal domain	IPR006094, IPR004113; IPR006094, IPR004113; IPR006094, IPR004113	FAD linked oxidase, N-terminal, FAD-binding oxidoreductase/transferase, type 4, C-terminal; FAD linked oxidase, N-terminal, FAD-binding oxidoreductase/transferase, type 4, C-terminal; FAD linked oxidase, N-terminal, FAD-binding oxidoreductase/transferase, type 4, C-terminal
jgi|Krisp1|2739132|estExt_Genemark4.C_2_t40347; jgi|Krisp1|2752447|estExt_Genemark4.C_14_t20021
jgi|Krisp1|2740825|estExt_Genemark4.C_4_t10007; jgi|Krisp1|2755605|estExt_Genemark4.C_210076
jgi|Krisp1|2740836|estExt_Genemark4.C_4_t10018; jgi|Krisp1|2794772|estExt_fgenesh1_pg.C_210054	PF08118; PF08118	Yeast mitochondrial distribution and morphology (MDM) proteins; Yeast mitochondrial distribution and morphology (MDM) proteins	IPR012571; IPR012571	Mitochondrial distribution and morphology protein family 31/32, fungi; Mitochondrial distribution and morphology protein family 31/32, fungi
jgi|Krisp1|2743977|estExt_Genemark4.C_6_t10320; jgi|Krisp1|2759499|fgenesh1_pm.1_#_122	PF02746, PF13378; PF02746, PF13378	Mandelate racemase / muconate lactonizing enzyme, N-terminal domain, Enolase C-terminal domain-like; Mandelate racemase / muconate lactonizing enzyme, N-terminal domain, Enolase C-terminal domain-like	IPR013341, IPR029065; IPR013341, IPR029065	Mandelate racemase/muconate lactonizing enzyme, N-terminal domain, Enolase C-terminal domain-like; Mandelate racemase/muconate lactonizing enzyme, N-terminal domain, Enolase C-terminal domain-like
jgi|Krisp1|2744250|estExt_Genemark4.C_6_t20104; jgi|Krisp1|2796543|estExt_fgenesh1_pg.C_320011	PF01180; PF01180	Dihydroorotate dehydrogenase; Dihydroorotate dehydrogenase	IPR005720; IPR005720	Dihydroorotate dehydrogenase, catalytic; Dihydroorotate dehydrogenase, catalytic
jgi|Krisp1|2749291|estExt_Genemark4.C_10_t20313; jgi|Krisp1|2783937|estExt_fgenesh1_pg.C_3_t20069	PF07690; PF07690	Major Facilitator Superfamily; Major Facilitator Superfamily	IPR011701; IPR011701	Major facilitator superfamily; Major facilitator superfamily
jgi|Krisp1|2749488|estExt_Genemark4.C_10_t30022; jgi|Krisp1|2749517|estExt_Genemark4.C_10_t30052
jgi|Krisp1|2753091|estExt_Genemark4.C_15_t20079; jgi|Krisp1|2758386|estExt_Genemark4.C_330034
jgi|Krisp1|2761903|fgenesh1_pm.3_#_660; jgi|Krisp1|2809571|MIX12276_1185_13	PF01302; PF01302	CAP-Gly domain; CAP-Gly domain	IPR000938; IPR000938	CAP Gly-rich domain; CAP Gly-rich domain
jgi|Krisp1|2766698|fgenesh1_pm.13_#_75; jgi|Krisp1|2743861|estExt_Genemark4.C_6_t10201	PF01058;	NADH ubiquinone oxidoreductase, 20 Kd subunit;	IPR006137;	NADH:ubiquinone oxidoreductase-like, 20kDa subunit;
jgi|Krisp1|2770449|estExt_fgenesh1_pm.C_1_t10487; jgi|Krisp1|2827216|MIX29921_168_27	PF04427; PF04427	Brix domain; Brix domain	IPR007109; IPR007109	Brix domain; Brix domain
jgi|Krisp1|2781914|estExt_fgenesh1_pg.C_1_t40151; jgi|Krisp1|2781924|estExt_fgenesh1_pg.C_1_t40161	PF07173; PF07173	Glycine-rich domain-containing protein-like; Glycine-rich domain-containing protein-like	IPR009836; IPR009836	Glycine-rich domain-containing protein-like; Glycine-rich domain-containing protein-like
jgi|Krisp1|2802884|MIX5589_575_63; jgi|Krisp1|2827661|MIX30366_2_15
jgi|Krisp1|2826947|MIX29652_1700_49; jgi|Krisp1|2830485|MIX33190_3690_72
jgi|Krisp1|2850294|MIX52999_388_53; jgi|Krisp1|2872183|MIX74888_372_54
