# Supplementary material for: Snow- and ice-ecosystem cleaning capability of the pucciniomycotinous yeast Phenoliferia psychrophenolica
Source: Research Square preprint supplement (doi:10.21203/rs.3.rs-5795686/v1), 2025-02-25
Supplement: Supplementary file 2 [file 4f8b06f8c4c940c7884b355a.xlsx]

## Sheet:  
P. psychrophenolica LCC-F-001-001 locus Ids of highly similar duplicate (HSD) genes	Pfam domain	Functional annotation based on Pfam domains	Interpro domain	Functional annotation based on Interpro domains
g93.t1; g118.t1
g108.t1; g119.t1
g606.t1; g777.t1; g9122.t1; g8168.t1; g7292.t1; g11486.t1; g11482.t1	PF00125, PF16211; PF00125, PF16211; PF00125, PF16211; PF00125, PF16211; PF00125, PF16211; PF16211, PF00125; PF00125, PF16211	Core histone H2A/H2B/H3/H4, C-terminus of histone H2A; Core histone H2A/H2B/H3/H4, C-terminus of histone H2A; Core histone H2A/H2B/H3/H4, C-terminus of histone H2A; Core histone H2A/H2B/H3/H4, C-terminus of histone H2A; Core histone H2A/H2B/H3/H4, C-terminus of histone H2A; C-terminus of histone H2A, Core histone H2A/H2B/H3/H4; Core histone H2A/H2B/H3/H4, C-terminus of histone H2A	IPR007125, IPR032454; IPR007125, IPR032454; IPR007125, IPR032454; IPR007125, IPR032454; IPR007125, IPR032454; IPR032454, IPR007125; IPR007125, IPR032454	Histone H2A/H2B/H3, Histone H2A, C-terminal domain; Histone H2A/H2B/H3, Histone H2A, C-terminal domain; Histone H2A/H2B/H3, Histone H2A, C-terminal domain; Histone H2A/H2B/H3, Histone H2A, C-terminal domain; Histone H2A/H2B/H3, Histone H2A, C-terminal domain; Histone H2A, C-terminal domain, Histone H2A/H2B/H3; Histone H2A/H2B/H3, Histone H2A, C-terminal domain
g11483.t1; g607.t1; g7293.t1; g9123.t1; g8169.t1; g8575.t1	PF00125; PF00125; PF00125; PF00125; PF00125; PF00125	Core histone H2A/H2B/H3/H4; Core histone H2A/H2B/H3/H4; Core histone H2A/H2B/H3/H4; Core histone H2A/H2B/H3/H4; Core histone H2A/H2B/H3/H4; Core histone H2A/H2B/H3/H4	IPR007125; IPR007125; IPR007125; IPR007125; IPR007125; IPR007125	Histone H2A/H2B/H3; Histone H2A/H2B/H3; Histone H2A/H2B/H3; Histone H2A/H2B/H3; Histone H2A/H2B/H3; Histone H2A/H2B/H3
g747.t1; g10536.t1; g2550.t1; g9146.t1; g1881.t1; g9103.t1	PF08240, PF00107; PF08240, PF00107; PF00107, PF08240; PF08240, PF00107; PF00107, PF08240; PF00107, PF08240	Alcohol dehydrogenase GroES-like domain, Zinc-binding dehydrogenase; Alcohol dehydrogenase GroES-like domain, Zinc-binding dehydrogenase; Zinc-binding dehydrogenase, Alcohol dehydrogenase GroES-like domain; Alcohol dehydrogenase GroES-like domain, Zinc-binding dehydrogenase; Zinc-binding dehydrogenase, Alcohol dehydrogenase GroES-like domain; Zinc-binding dehydrogenase, Alcohol dehydrogenase GroE…	IPR013154, IPR013149; IPR013154, IPR013149; IPR013149, IPR013154; IPR013154, IPR013149; IPR013149, IPR013154; IPR013149, IPR013154	Alcohol dehydrogenase-like, N-terminal, Alcohol dehydrogenase-like, C-terminal; Alcohol dehydrogenase-like, N-terminal, Alcohol dehydrogenase-like, C-terminal; Alcohol dehydrogenase-like, C-terminal, Alcohol dehydrogenase-like, N-terminal; Alcohol dehydrogenase-like, N-terminal, Alcohol dehydrogenase-like, C-terminal; Alcohol dehydrogenase-like, C-terminal, Alcohol dehydrogenase-like, N-terminal;…
g988.t1; g11262.t1; g11254.t1; g9083.t1	PF10685; PF10685; PF10685; PF10685	Stress-induced bacterial acidophilic repeat motif; Stress-induced bacterial acidophilic repeat motif; Stress-induced bacterial acidophilic repeat motif; Stress-induced bacterial acidophilic repeat motif	IPR019626; IPR019626; IPR019626; IPR019626	Stress-induced protein, KGG, repeat; Stress-induced protein, KGG, repeat; Stress-induced protein, KGG, repeat; Stress-induced protein, KGG, repeat
g1313.t1; g10437.t1	PF00171; PF00171	Aldehyde dehydrogenase family; Aldehyde dehydrogenase family	IPR015590; IPR015590	Aldehyde dehydrogenase domain; Aldehyde dehydrogenase domain
g2163.t1; g2172.t1	PF04430; PF04430	Protein of unknown function (DUF498/DUF598); Protein of unknown function (DUF498/DUF598)	IPR007523; IPR007523	NDUFAF3/Mth938 domain-containing protein; NDUFAF3/Mth938 domain-containing protein
g2273.t1; g5184.t1
g2295.t1; g2472.t1
g2310.t1; g2354.t1
g2661.t1; g6327.t1	PF02728, PF01179; PF01179, PF02728	Copper amine oxidase, N3 domain, Copper amine oxidase, enzyme domain; Copper amine oxidase, enzyme domain, Copper amine oxidase, N3 domain	IPR015802, IPR015798; IPR015798, IPR015802	Copper amine oxidase, N3-terminal, Copper amine oxidase, catalytic domain; Copper amine oxidase, catalytic domain, Copper amine oxidase, N3-terminal
g2950.t1; g2962.t1
g3008.t1; g3043.t1
g3263.t1; g3264.t1	PF01753; PF01753	MYND finger; MYND finger	IPR002893; IPR002893	Zinc finger, MYND-type; Zinc finger, MYND-type
g3326.t1; g3327.t1
g4778.t1; g5565.t1; g5578.t1; g5590.t1; g5595.t1; g5619.t1; g5633.t1; g7284.t1; g8321.t1; g9513.t1; g9538.t1; g3400.t1; g5611.t1	PF15511; PF15511; PF15511; PF15511; PF15511; PF15511; PF15511; PF15511; PF15511; PF15511; PF15511; PF15511; PF15511	Centromere kinetochore component CENP-T histone fold; Centromere kinetochore component CENP-T histone fold; Centromere kinetochore component CENP-T histone fold; Centromere kinetochore component CENP-T histone fold; Centromere kinetochore component CENP-T histone fold; Centromere kinetochore component CENP-T histone fold; Centromere kinetochore component CENP-T histone fold; Centromere kinetochor…	IPR035425; IPR035425; IPR035425; IPR035425; IPR035425; IPR035425; IPR035425; IPR035425; IPR035425; IPR035425; IPR035425; IPR035425; IPR035425	CENP-T/Histone H4, histone fold; CENP-T/Histone H4, histone fold; CENP-T/Histone H4, histone fold; CENP-T/Histone H4, histone fold; CENP-T/Histone H4, histone fold; CENP-T/Histone H4, histone fold; CENP-T/Histone H4, histone fold; CENP-T/Histone H4, histone fold; CENP-T/Histone H4, histone fold; CENP-T/Histone H4, histone fold; CENP-T/Histone H4, histone fold; CENP-T/Histone H4, histone fold; CEN…
g4777.t1; g5566.t1; g5579.t1; g5589.t1; g5596.t1; g5610.t1; g5620.t1; g5632.t1; g7283.t1; g8322.t1; g9514.t1; g9537.t1; g3401.t1	PF00125; PF00125; PF00125; PF00125; PF00125; PF00125; PF00125; PF00125; PF00125; PF00125; PF00125; PF00125; PF00125	Core histone H2A/H2B/H3/H4; Core histone H2A/H2B/H3/H4; Core histone H2A/H2B/H3/H4; Core histone H2A/H2B/H3/H4; Core histone H2A/H2B/H3/H4; Core histone H2A/H2B/H3/H4; Core histone H2A/H2B/H3/H4; Core histone H2A/H2B/H3/H4; Core histone H2A/H2B/H3/H4; Core histone H2A/H2B/H3/H4; Core histone H2A/H2B/H3/H4; Core histone H2A/H2B/H3/H4; Core histone H2A/H2B/H3/H4	IPR007125; IPR007125; IPR007125; IPR007125; IPR007125; IPR007125; IPR007125; IPR007125; IPR007125; IPR007125; IPR007125; IPR007125; IPR007125	Histone H2A/H2B/H3; Histone H2A/H2B/H3; Histone H2A/H2B/H3; Histone H2A/H2B/H3; Histone H2A/H2B/H3; Histone H2A/H2B/H3; Histone H2A/H2B/H3; Histone H2A/H2B/H3; Histone H2A/H2B/H3; Histone H2A/H2B/H3; Histone H2A/H2B/H3; Histone H2A/H2B/H3; Histone H2A/H2B/H3
g3646.t1; g3657.t1	PF00462; PF00462	Glutaredoxin; Glutaredoxin	IPR002109; IPR002109	Glutaredoxin; Glutaredoxin
g4251.t1; g4262.t1	;	;	;	;
g4252.t1; g4261.t1
g5475.t1; g5497.t1	PF01184; PF01184	GPR1/FUN34/yaaH family; GPR1/FUN34/yaaH family	IPR000791; IPR000791	Acetate transporter GPR1/Ato2/SatP-like; Acetate transporter GPR1/Ato2/SatP-like
g5580.t1; g5588.t1	PF14087; PF14087	Domain of unknown function (DUF4267); Domain of unknown function (DUF4267)	IPR025363; IPR025363	Protein of unknown function DUF4267; Protein of unknown function DUF4267
g5650.t1; g11001.t1	PF00069; PF00069	Protein kinase domain; Protein kinase domain	IPR000719; IPR000719	Protein kinase domain; Protein kinase domain
g5726.t1; g5757.t1
g6975.t1; g7008.t1; g10849.t1
g7207.t1; g8318.t1
g7267.t1; g7280.t1
g7277.t1; g7278.t1	PF17667; PF17667	Fungal protein kinase; Fungal protein kinase	IPR040976; IPR040976	Fungal-type protein kinase; Fungal-type protein kinase
g7590.t1; g8996.t1	PF01776; PF01776	Ribosomal L22e protein family; Ribosomal L22e protein family	IPR002671; IPR002671	Large ribosomal subunit protein eL22; Large ribosomal subunit protein eL22
g7691.t1; g7703.t1	PF11034; PF11034	Glucose-repressible protein Grg1; Glucose-repressible protein Grg1	IPR020100; IPR020100	Glucose-repressible protein Grg1; Glucose-repressible protein Grg1
g8195.t1; g8201.t1		;
g9315.t1; g9336.t1	PF01786; PF01786	Alternative oxidase; Alternative oxidase	IPR002680; IPR002680	Alternative oxidase; Alternative oxidase
g10200.t1; g10222.t1	PF04969; PF04969	CS domain; CS domain	IPR007052; IPR007052	CS domain; CS domain
g10334.t1; g10351.t1	PF00106; PF00106	short chain dehydrogenase; short chain dehydrogenase	IPR002347; IPR002347	Short-chain dehydrogenase/reductase SDR; Short-chain dehydrogenase/reductase SDR
