# Supplementary material for: Snow- and ice-ecosystem cleaning capability of the pucciniomycotinous yeast Phenoliferia psychrophenolica
Source: Research Square preprint supplement (doi:10.21203/rs.3.rs-5795686/v1), 2025-02-25
Supplement: Supplementary file 3 [file 912edee521140be09d450702.xlsx]

## Sheet: Feuil1
Species	Phylum	Class	Snow fungus	Genome size (Mb)	N50	Number of proteins	Busco completion (Protein)	ID (NCBI or JGI)	Link to the Genome
Phenoliferia psychrophenolica	Basidiomycota	Microbotryomycetes	Yes	41.62	621 kb	11523	C:92.0%[S:90.4%,D:1.6%],F:1.5%,M:6.5%,n:758
Kriegeriales sp.	Basidiomycota	Microbotryomycetes	Yes	75.29	3.21 Mb	15297	C:97.3%[S:92.3%,D:5.0%],F:0.5%,M:2.2%,n:758	1287872	https://mycocosm.jgi.doe.gov/Krisp1/Krisp1.home.html
Leucosporidium creatinivorum	Basidiomycota	Microbotryomycetes	Yes	26.3	301 kb	9584	C:94.2%[S:93.7%,D:0.5%],F:1.5%,M:4.3%,n:758	GCA_002105055.1	https://www.ncbi.nlm.nih.gov/datasets/genome/GCA_002105055.1/
Meredithblackwellia eburnea	Basidiomycota	Microbotryomycetes	No	30.68	1.33 Mb	11135	C:97.1%[S:96.0%,D:1.1%],F:0.5%,M:2.4%,n:758	1019596	https://mycocosm.jgi.doe.gov/Mereb1/Mereb1.home.html
Rhodotorula mucilaginosa	Basidiomycota	Microbotryomycetes	No	20.1	134.6 kb	7059	C:93.7%[S:93.4%,D:0.3%],F:1.6%,M:4.7%,n:758	GCA_016584205.1	https://www.ncbi.nlm.nih.gov/datasets/genome/GCA_016584205.1/
Rhodotorula turoloides	Basidiomycota	Microbotryomycetes	No	20.2	574.9 kb	8140	C:97.5%[S:97.1%,D:0.4%],F:0.3%,M:2.2%,n:758	GCA_000320785.2	https://www.ncbi.nlm.nih.gov/datasets/genome/GCF_000320785.1/
Rhodotorula glutinis	Basidiomycota	Microbotryomycetes	No	20.09	204.5 kb	8277	C:96.0%[S:95.6%,D:0.4%],F:0.9%,M:3.1%,n:758	1099283	https://mycocosm.jgi.doe.gov/Rhoglu1/Rhoglu1.home.html
Pseudohyphozyma borogiensis	Basidiomycota	Microbotryomycetes	No	25.9	159.8 kb	7847	C:81.9%[S:81.1%,D:0.8%],F:3.3%,M:14.8%,n:758	GCA_024364755.1	https://www.ncbi.nlm.nih.gov/datasets/genome/GCA_024364755.1/
Sclerotinia borealis	Ascomycota	Leotiomycetes	Yes	39.5	130.5 kb	10166	C:98.5%[S:98.4%,D:0.1%],F:0.4%,M:1.1%,n:758	GCA_000503235.1	https://www.ncbi.nlm.nih.gov/datasets/genome/GCA_000503235.1/
Slooffia pilatii	Basidiomycota	Microbotryomycetes	No	34.8	2.76 Mb	12822	C:96.2%[S:94.6%,D:1.6%],F:0.9%,M:2.9%,n:758	1119237	https://genome.jgi.doe.gov/portal/Slopil1/Slopil1.download.html
Microbotryum lychnidis-dioicae	Basidiomycota	Microbotryomycetes	No	26.14	185.0 kb	7819	C:96.7%[S:92.5%,D:4.2%],F:0.8%,M:2.5%,n:758	not found	https://mycocosm.jgi.doe.gov/Micld1/Micld1.home.html
Saccharomyces cerevisiae	Ascomycota	Saccharomycetes	No	12.1	927.4 kb	6017	C:96.9%[S:94.9%,D:2.0%],F:0.1%,M:3.0%,n:758	GCA_000146045.2	https://www.ncbi.nlm.nih.gov/datasets/genome/GCF_000146045.2/
Mortierella alpina	Mucoromycota	Mortierellomycetes	Yes	37.7	101.4 kb	10498	C:97.0%[S:89.1%,D:7.9%],F:0.3%,M:2.7%,n:758	GCA_015680655.1	https://www.ncbi.nlm.nih.gov/datasets/genome/GCA_015680655.1/
