# Supplementary material for: Snow- and ice-ecosystem cleaning capability of the pucciniomycotinous yeast Phenoliferia psychrophenolica
Source: Research Square preprint supplement (doi:10.21203/rs.3.rs-5795686/v1), 2025-02-25
Supplement: Supplementary file 4 [file 9715bb32f376273307617fd3.xlsx]

## Sheet: Supplementary Table 13
	Phenoliferia psychrophenolica	Kregeriales sp. P6C61	Leucosporidium creatinivorum	Meredithblackwellia eburnea	Microbotryum lychnidis-dioicae	Mortiella alpina	Pseudohyphozyma borogiensis	Rhodotorula mucilaginosa	Rhodotorula turoloides	Rhodotorula glutinis	Saccharomyces cerevisiae	Sclerotinia borealis	Slooffia pilatii
Number of genes	11816	15297	9854	11135	7819	10498	7847	7059	8140	8277	6017	10166	12822
Number of genes in orthogroups	11322	13468	9103	9808	7455	8777	7485	6696	7980	7722	4814	7640	11718
Number of unassigned genes	494	1829	751	1327	364	1721	362	363	160	555	1203	2526	1104
Percentage of genes in orthogroups	95.8	88	92.4	88.1	95.3	83.6	95.4	94.9	98	93.3	80	75.2	91.4
Percentage of unassigned genes	4.2	12	7.6	11.9	4.7	16.4	4.6	5.1	2	6.7	20	24.8	8.6
Number of orthogroups containing species	6856	7669	6508	7106	5761	5044	5599	5674	6618	6446	3601	5212	7147
Percentage of orthogroups containing species	58.5	65.4	55.5	60.6	49.1	43	47.7	48.4	56.4	55	30.7	44.4	61
Number of species-specific orthogroups	205	341	137	194	136	622	75	89	16	34	150	294	285
Number of genes in species-specific orthogroups	740	1140	502	543	561	2229	251	329	38	77	513	1137	1357
Percentage of genes in species-specific orthogroups	6.3	7.5	5.1	4.9	7.2	21.2	3.2	4.7	0.5	0.9	8.5	11.2	10.6
Number of genes per-species in orthogroup	Number of orthogroups	Number of orthogroups	Number of orthogroups	Number of orthogroups	Number of orthogroups	Number of orthogroups	Number of orthogroups	Number of orthogroups	Number of orthogroups	Number of orthogroups	Number of orthogroups	Number of orthogroups	Number of orthogroups
0	4870	4057	5218	4620	5965	6682	6127	6052	5108	5280	8125	6514	4579
1	5208	5380	5309	5720	4832	3193	4639	5062	5821	5633	2840	4141	5474
2	913	1315	759	833	648	1306	584	421	563	593	595	639	923
3	298	397	200	262	143	265	177	108	126	127	101	215	288
4	156	176	91	138	58	105	83	36	54	45	35	80	157
5	89	124	50	53	27	47	39	22	16	20	12	28	90
6	34	75	26	27	17	35	24	9	14	6	5	33	45
7	27	45	20	28	12	17	17	4	7	9	3	16	45
8	26	42	12	17	1	13	14	4	2	4	2	13	25
9	21	18	6	9	2	8	8	2	6	4	0	12	21
10	21	21	8	6	6	5	3	0	3	2	0	5	19
11-15	36	39	13	11	8	29	8	4	3	1	2	19	31
16-20	11	23	5	0	3	10	3	2	0	1	1	2	16
21-50	10	11	8	2	4	9	0	0	3	1	4	8	10
51-100	6	2	1	0	0	2	0	0	0	0	1	1	1
101-150	0	1	0	0	0	0	0	0	0	0	0	0	1
151-200	0	0	0	0	0	0	0	0	0	0	0	0	1
201-500	0	0	0	0	0	0	0	0	0	0	0	0	0
501-1000	0	0	0	0	0	0	0	0	0	0	0	0	0
1001+	0	0	0	0	0	0	0	0	0	0	0	0	0
Number of genes per-species in orthogroup	Percentage of orthogroups	Percentage of orthogroups	Percentage of orthogroups	Percentage of orthogroups	Percentage of orthogroups	Percentage of orthogroups	Percentage of orthogroups	Percentage of orthogroups	Percentage of orthogroups	Percentage of orthogroups	Percentage of orthogroups	Percentage of orthogroups	Percentage of orthogroups
0	41.5	34.6	44.5	39.4	50.9	57	52.3	51.6	43.6	45	69.3	55.6	39
1	44.4	45.9	45.3	48.8	41.2	27.2	39.6	43.2	49.6	48	24.2	35.3	46.7
2	7.8	11.2	6.5	7.1	5.5	11.1	5	3.6	4.8	5.1	5.1	5.4	7.9
3	2.5	3.4	1.7	2.2	1.2	2.3	1.5	0.9	1.1	1.1	0.9	1.8	2.5
4	1.3	1.5	0.8	1.2	0.5	0.9	0.7	0.3	0.5	0.4	0.3	0.7	1.3
5	0.8	1.1	0.4	0.5	0.2	0.4	0.3	0.2	0.1	0.2	0.1	0.2	0.8
6	0.3	0.6	0.2	0.2	0.1	0.3	0.2	0.1	0.1	0.1	0	0.3	0.4
7	0.2	0.4	0.2	0.2	0.1	0.1	0.1	0	0.1	0.1	0	0.1	0.4
8	0.2	0.4	0.1	0.1	0	0.1	0.1	0	0	0	0	0.1	0.2
9	0.2	0.2	0.1	0.1	0	0.1	0.1	0	0.1	0	0	0.1	0.2
10	0.2	0.2	0.1	0.1	0.1	0	0	0	0	0	0	0	0.2
11-15	0.3	0.3	0.1	0.1	0.1	0.2	0.1	0	0	0	0	0.2	0.3
16-20	0.1	0.2	0	0	0	0.1	0	0	0	0	0	0	0.1
21-50	0.1	0.1	0.1	0	0	0.1	0	0	0	0	0	0.1	0.1
51-100	0.1	0	0	0	0	0	0	0	0	0	0	0	0
101-150	0	0	0	0	0	0	0	0	0	0	0	0	0
151-200	0	0	0	0	0	0	0	0	0	0	0	0	0
201-500	0	0	0	0	0	0	0	0	0	0	0	0	0
501-1000	0	0	0	0	0	0	0	0	0	0	0	0	0
1001+	0	0	0	0	0	0	0	0	0	0	0	0	0
Number of genes per-species in orthogroup	Number of genes	Number of genes	Number of genes	Number of genes	Number of genes	Number of genes	Number of genes	Number of genes	Number of genes	Number of genes	Number of genes	Number of genes	Number of genes
0	0	0	0	0	0	0	0	0	0	0	0	0	0
1	5208	5380	5309	5720	4832	3193	4639	5062	5821	5633	2840	4141	5474
2	1826	2630	1518	1666	1296	2612	1168	842	1126	1186	1190	1278	1846
3	894	1191	600	786	429	795	531	324	378	381	303	645	864
4	624	704	364	552	232	420	332	144	216	180	140	320	628
5	445	620	250	265	135	235	195	110	80	100	60	140	450
6	204	450	156	162	102	210	144	54	84	36	30	198	270
7	189	315	140	196	84	119	119	28	49	63	21	112	315
8	208	336	96	136	8	104	112	32	16	32	16	104	200
9	189	162	54	81	18	72	72	18	54	36	0	108	189
10	210	210	80	60	60	50	30	0	30	20	0	50	190
11-15	457	492	166	135	95	369	90	45	35	11	26	233	402
16-20	204	405	83	0	57	174	53	37	0	17	16	38	280
21-50	284	346	231	49	107	307	0	0	91	27	121	215	284
51-100	380	122	56	0	0	117	0	0	0	0	51	58	54
101-150	0	105	0	0	0	0	0	0	0	0	0	0	110
151-200	0	0	0	0	0	0	0	0	0	0	0	0	162
201-500	0	0	0	0	0	0	0	0	0	0	0	0	0
501-1000	0	0	0	0	0	0	0	0	0	0	0	0	0
1001+	0	0	0	0	0	0	0	0	0	0	0	0	0
Number of genes per-species in orthogroup	Percentage of genes	Percentage of genes	Percentage of genes	Percentage of genes	Percentage of genes	Percentage of genes	Percentage of genes	Percentage of genes	Percentage of genes	Percentage of genes	Percentage of genes	Percentage of genes	Percentage of genes
0	0	0	0	0	0	0	0	0	0	0	0	0	0
1	44.1	35.2	53.9	51.4	61.8	30.4	59.1	71.7	71.5	68.1	47.2	40.7	42.7
2	15.5	17.2	15.4	15	16.6	24.9	14.9	11.9	13.8	14.3	19.8	12.6	14.4
3	7.6	7.8	6.1	7.1	5.5	7.6	6.8	4.6	4.6	4.6	5	6.3	6.7
4	5.3	4.6	3.7	5	3	4	4.2	2	2.7	2.2	2.3	3.1	4.9
5	3.8	4.1	2.5	2.4	1.7	2.2	2.5	1.6	1	1.2	1	1.4	3.5
6	1.7	2.9	1.6	1.5	1.3	2	1.8	0.8	1	0.4	0.5	1.9	2.1
7	1.6	2.1	1.4	1.8	1.1	1.1	1.5	0.4	0.6	0.8	0.3	1.1	2.5
8	1.8	2.2	1	1.2	0.1	1	1.4	0.5	0.2	0.4	0.3	1	1.6
9	1.6	1.1	0.5	0.7	0.2	0.7	0.9	0.3	0.7	0.4	0	1.1	1.5
10	1.8	1.4	0.8	0.5	0.8	0.5	0.4	0	0.4	0.2	0	0.5	1.5
11-15	3.9	3.2	1.7	1.2	1.2	3.5	1.1	0.6	0.4	0.1	0.4	2.3	3.1
16-20	1.7	2.6	0.8	0	0.7	1.7	0.7	0.5	0	0.2	0.3	0.4	2.2
21-50	2.4	2.3	2.3	0.4	1.4	2.9	0	0	1.1	0.3	2	2.1	2.2
51-100	3.2	0.8	0.6	0	0	1.1	0	0	0	0	0.8	0.6	0.4
101-150	0	0.7	0	0	0	0	0	0	0	0	0	0	0.9
151-200	0	0	0	0	0	0	0	0	0	0	0	0	1.3
201-500	0	0	0	0	0	0	0	0	0	0	0	0	0
501-1000	0	0	0	0	0	0	0	0	0	0	0	0	0
1001+	0	0	0	0	0	0	0	0	0	0	0	0	0
