# Supplementary material for: Snow- and ice-ecosystem cleaning capability of the pucciniomycotinous yeast Phenoliferia psychrophenolica
Source: Research Square preprint supplement (doi:10.21203/rs.3.rs-5795686/v1), 2025-02-25
Supplement: Supplementary file 5 [file a56f7a0b4861726d7ec4551a.xlsx]

## Sheet: TPS1
Species	TPS1_SCHPO	https://www.uniprot.org/uniprotkb/P40387/entry
Phenoliferia psychrophenolica	1
Kriegeriales sp.	2
Leucosporidium creatinivorum	2
Meredithblackwellia eburnea	2
Rhodotorula mucilaginosa	3
Rhodotorula turoloides	3
Rhodotorula glutinis	2
Pseudohyphozyma borogiensis	2
Sclerotinia borealis	3
Slooffia pilatii	3
Microbotryum lychnidis-dioicae	3
Saccharomyces cerevisiae	4
Mortierella alpina	5

## Sheet: HSP60
Species	NP_013360.1 chaperone ATPase HSP60 [Saccharomyces cerevisiae S288C]
Phenoliferia psychrophenolica	1
Kriegeriales sp.	1
Leucosporidium creatinivorum	1
Meredithblackwellia eburnea	1 ou 2
Rhodotorula mucilaginosa	1
Rhodotorula turoloides	1
Rhodotorula glutinis	1
Pseudohyphozyma borogiensis	1
Sclerotinia borealis	1 ou 2
Slooffia pilatii	1
Microbotryum lychnidis-dioicae	1
Saccharomyces cerevisiae	1
Mortierella alpina	1 ou 2

## Sheet:  
Species	Snow fungi	PF11999 Ice binding	nb proteins	PF00487 Fatty acid desaturase 1	nb proteins	PFAM 04119 HSP9_HSP12; Heat shock protein 9/12	nb proteins	PF00011.24 Hsp20/alpha crystallin family	nb proteins	PF17876 Cold shock domain	nb proteins	PF01430.22 Hsp33 protein	nb proteins	PF00012.23 Hsp70 protein	nb proteins	PF00183.21 Hsp90 protein	nb proteins	PF07690 Major Facilitator Superfamily	nb proteins	PF00067 Cytochrome P450	nb proteins
Phenoliferia psychrophenolica	Yes	46	37	10	10	4	2	4	4	0	0	0	0	18	17	2	2	180	178	70	59
Kriegeriales sp. (P. himalayensis)	Yes	13	13	13	13	3	2	10	10	0	0	0	0	13	13	2	2	262	258	69	60
Leucosporidium creatinivorum	Yes	0	0	8	8	0	0	8	8	0	0	0	0	10	9	2	2	186	179	31	30
Meredithblackwellia eburnea	No	0	0	8	8	1	1	0	0	0	0	0	0	9	9	2	2	249	242	33	30
Rhodotorula mucilaginosa	No	0	0	4	4	0	0	0	0	0	0	0	0	7	7	5	5	97	91	12	11
Rhodotorula turoloides	No	0	0	4	4	0	0	0	0	0	0	0	0	10	10	2	2	119	110	17	15
Rhodotorula glutinis	No	0	0	4	4	0	0	0	0	0	0	0	0	10	10	2	2	115	110	16	15
Pseudohyphozyma borogiensis	No	0	0	9	8	0	0	3	3	0	0	0	0	8	8	2	2	213	207	27	24
Sclerotinia borealis	Yes	1	1	7	7	1	1	2	2	0	0	0	0	12	11	1	1	173	168	79	76
Slooffia pilatii	No	0	0	9	9	0	0	0	0	0	0	0	0	13	13	2	2	271	261	65	60
Microbotryum lychnidis-dioicae	No	0	0	5	5	0	0	2	2	0	0	0	0	7	7	2	2	101	97	11	10
Saccharomyces cerevisiae	No	0	0	1	1	1	1	2	2	0	0	0	0	14	14	2	2	47	45	3	3
Mortierella alpina	Yes	0	0	13	13	0	0	1	1	0	0	0	0	15	15	5	4	93	85	60	44
