# Supplementary material for: Snow- and ice-ecosystem cleaning capability of the pucciniomycotinous yeast Phenoliferia psychrophenolica
Source: Research Square preprint supplement (doi:10.21203/rs.3.rs-5795686/v1), 2025-02-25
Supplement: Supplementary file 6 [file b2c76c6c941c171337dae477.xlsx]

## Sheet:  
Fam_Subf	Metabolism	Phenoliferia psychrophenolica LCC-F-001-001	Rhodosporidium toruloides NP11 (JGI:Rhoto1)	Rhodosporidium toruloides ATCC26217 v1 (JGI:Rhoto_ATCC26217_1)	Rhodosporidium toruloides APA 2687 v1.0 (JGI:Rhoto1_APA2687_1)	Rhodosporidium toruloides IFO0559_1 (JGI:Rhoto_IFO0559_1)	Rhodosporidium toruloides IFO1236_1 (JGI:Rhoto_IFO1236_1)	Rhodosporidium toruloides IFO0880 v4.0 (JGI:Rhoto_IFO0880_4)	Rhodotorula toruloides CECT1137 (NCBI :GCA_003234015.1)	Rhodotorula sp. JG-1b v1 (JGI:Rhosp1)	Rhodotorula sp. J31 v1.0 (JGI:RhodotJ31_1)	Rhodotorula graminis strain WP1 v1.1 (JGI:Rhoba1_1)	Rhodotorula glutinis v1.0 (JGI:Rhoglu1)	Rhodosporidium glutinis ATCC 204091 v1.0 (JGI:Rhoglu91_1)	Rhodotorula mucilaginosa ATCC58901 v1.0 (JGI:Rhomuc1)	Rhodosporidium diobovatum 08-225 v1.0 (JGI:Rhodia1_1)	Sporidiobolus pararoseus UCDFST 68-350 v1.0 (JGI:Spopa1)	Sporobolomyces roseus v1 (JGI:Sporo1)	Microbotryum lychnidis-dioicae p1A1 Lamole (JGI:Micld1)	Microbotryum violaceum p1A1 Lamole (JGI:Micvi1)	Microthyrium microscopicum CBS 115976 v1.0 (JGI:Micmi1)	Meredithblackwellia eburnea MCA 4105 v1.0 (JGI:Mereb1)	Kriegeriales sp. isolate P6C61 v1.0 (JGI:Krisp1)*	Slooffia pilatii Y-17178 v1.0 (JGI:Slopil1)	Microbotryomycetes incertae sedis isolate P6C30 v1.0 (JGI:Slotsu1)	Hyalopycnis blepharistoma ATCC 48560 v1.0 (JGI:Hyabl1)	Heterogastridium pycnidioideum ATCC MYA-4631 (JGI:Hetpy1)	Leucosporidiella creatinivora UCDFST 62-1032 v1.0 (JGI:Leucr1)	Microbotryomycetes sp. P2C70 v1.0 (JGI:ObeP2C70)	Pseudohyphozyma borogiensis ATCC 18809 (NCBI :GCA_024364755.1)
TOTAL DISTINCT FAMILIES		90	74	73	72	73	73	75	73	66	66	73	73	74	66	71	67	61	63	63	63	85	90	78	70	61	61	83	77	73
GH1	a-L-arabinopyranosidase; a-neuraminidase; abscisate b-glucosidase; amygdalin b-glucosidase; anthocyanin 5-O-glucosyltransferase / 5-O-transglucosidase; anthocyanin 7-O-glucosyltransferase / 7-O-transglucosidase; avenacosidase 26-O-b-glucosidase; b-(6 phospho)-glucosidase; b-(6-phospho)-galactosidase; b-fucosidase; b-galactosidase; b-glucosidase; b-glucuronidase; b-mannosidase; b-transglucosidase;…	7	0	0	0	0	0	0	0	0	0	0	0	0	0	0	0	0	1	1	1	0	1	2	0	1	1	1	1	0
GH2	a-L-arabinofuranosidase; a-L-arabinopyranosidase; b-galactofuranosidase; b-galactosidase; b-galacturonidase; b-glucosidase; b-glucuronidase; b-mannosidase; b-N-acetylhexosaminidase; chitosan exo-b-1,4-N-glucosaminase; galactan exo-b-1,3-galactosidase; glycyrrhizin b-glucuronidase; lactose b-1,4-galactosidase; mannosyl-oligosaccharide endo-b-1,4-mannosidase; rhamnogalacturonan II exo-b-1,3-galactu…	1	1	1	1	1	1	1	1	1	1	1	1	1	1	1	1	1	1	1	1	1	1	1	1	1	1	1	1	1
GH3	a-L-arabinofuranosidase; a-L-arabinopyranosidase; avenacin b-1,2-glucosidase; avenacin b-1,4-glucosidase; b-fucosidase; b-galactosidase; b-glucosidase; b-glucoside phosphorylase; b-glucuronidase; b-N-acetylhexosaminidase; b-N-acteylglucosamine phosphorylase; cellulose exo-b-1,4-glucosidase; ceramide b-glucosidase; chitosan endo-b-1,4-N-glucosaminase; coniferin b-glucosidase; gentiobiose b-1,6-glu…	14	4	4	5	4	5	5	4	3	4	4	5	5	4	5	3	3	4	4	4	11	8	4	0	1	1	5	5	4
GH5	a-L-arabinofuranosidase; arabinoxylan endo-b-1,4-xylosidase; b-galactofuranosidase; b-galactosidase; b-glucosidase; b-mannosidase; b-N-acetylhexosaminidase; cellulose endo-b-1,4-glucosidase; cellulose exo-b-1,4-glucobiosidase; cellulose exo-b-1,4-glucosidase; ceramide b-galactosidase; ceramide b-glucosidase; chitosan endo-b-1,4-N-glucosaminase; galactan endo-b-1,6-galactosidase; glucan endo-b-1,3…	9	8	8	8	8	8	8	9	6	6	7	8	8	6	7	7	4	11	11	11	9	9	8	8	9	7	6	11	7
GH5_5	cellulose endo-b-1,4-glucosidase	0	0	0	0	0	0	0	0	0	0	0	0	0	0	0	0	0	0	0	0	0	0	0	0	0	0	0	4	0
GH5_7	b-mannosidase; mannan endo-b-1,4-mannosidase	2	0	0	0	0	0	0	0	0	0	0	0	0	0	0	0	0	0	0	0	0	2	0	0	0	0	1	0	0
GH5_9	b-glucosidase; glucan exo-b-1,3-glucosidase; pustulan endo-b-1,6-glucosidase	6	2	2	2	2	2	2	2	2	2	2	2	2	2	2	3	2	5	5	5	6	5	4	2	3	3	4	3	5
GH5_12	b-glucosidase; ceramide b-glucosidase; steryl b-glucosidase	2	2	2	2	2	2	2	2	2	2	2	2	2	2	2	2	2	3	3	3	2	2	2	1	2	2	2	2	1
GH5_15	pustulan endo-b-1,6-glucosidase	5	0	0	0	0	0	0	0	0	0	0	0	0	0	0	3	1	0	0	0	5	3	2	3	0	0	2	3	0
GH5_22	cellulose endo-b-1,4-glucosidase; xylan endo-b-1,4-xylosidase; xylan exo-b-1,4-xylosidase	2	0	0	0	0	0	0	0	0	0	0	0	0	0	0	0	0	0	0	0	0	0	0	0	0	0	1	0	0
GH5_23	hesperidin 6-O-a-rhamnosyl-b-glucosidase; primeverose b-glucosidase; rutin b-(rhamnosyl)-glucosidase	7	0	0	0	0	0	0	0	0	0	0	0	0	0	0	0	0	0	0	0	0	0	0	0	0	0	0	0	0
GH5_27	oligoglycan ceramide endo-b-glucosidase	1	0	0	0	0	0	0	0	0	0	0	0	0	0	0	0	0	0	0	0	0	2	2	0	0	0	0	1	0
GH7	cellulose endo-b-1,4-glucosidase; chitosan endo-b-1,4-N-glucosaminase; MLG endo-b-1,4-glucosidase; reducing end cellulose exo-b-1,4-glucobiosidase	2	0	0	0	0	0	0	0	0	0	0	0	0	0	0	0	0	0	0	0	0	1	0	0	0	0	0	1	0
GH12	cellulose endo-b-1,4-glucosidase; MLG endo-b-1,4-glucosidase; xyloglucan endo-b-1,4-glucosidase	3	0	0	0	0	0	0	0	0	0	0	0	0	0	0	0	0	0	0	0	2	4	1	1	0	0	1	0	2
GH13_4	amylosucrase; sucrose a-1,2-glucosidase	0	0	0	0	0	0	0	0	0	0	0	0	0	0	0	0	0	0	0	0	1	0	0	0	0	0	0	1	0
GH13_5	amylose endo-a-1,4-glucosidase; amylose exo-1,4-glucopentaosidase; amylose exo-a-1,4-glucohexaosidase; amylose exo-a-1,4-glucotriosidase	1	1	1	1	1	1	1	1	1	1	1	1	1	1	1	1	1	1	1	1	1	1	1	2	1	1	1	1	1
GH13_8	1,4-a-glucan branching enzyme; amylose endo-a-1,4-glucosidase	0	1	1	1	1	1	1	1	1	1	1	1	1	1	1	1	1	1	1	1	1	1	1	1	1	1	1	1	1
GH13_22		2	0	0	0	0	0	0	0	0	0	0	0	0	0	0	0	0	0	0	0	1	1	0	0	0	0	0	2	0
GH13_25	4-a-glucanotransferase	1	1	1	1	1	1	1	1	1	1	1	1	1	1	1	1	1	1	1	1	1	1	1	1	1	1	1	1	1
GH13_32	amylose endo-a-1,4-glucosidase; amylose exo-a-1,4-glucotriosidase	4	0	0	0	0	0	0	0	0	0	0	0	0	0	0	0	0	0	0	0	3	6	0	0	0	0	1	2	0
GH13_40	a-glucosidase; dextran exo-a-1,6-glucosidase; oligo exo-a-1,6-glucosidase; sucrose a-transglucosidase	4	1	1	1	2	1	1	1	2	2	0	1	1	2	1	1	1	5	5	5	7	3	4	1	1	1	1	3	1
GH15	amylose exo-a-1,4-glucosidase; dextran exo-a-1,6-glucosidase; isomaltose a-1,6-glucosidase; trehalose a-1,1-glucosidase	3	2	2	2	2	2	2	2	2	2	2	2	2	2	2	3	3	3	3	3	4	5	5	3	2	2	2	3	3
GH16	agarose endo-b-1,4-galactosidase; b-1,3-glucanosyltransglucosidase; b-carrageenase endo-b-1,4-galactosidase; b-galactosidase; b-glucosidase; b-transglycosidase ; chitin b-1,3/1,6-glucanosyltransferase; galactan endo-b-1,3-galactosidase; galactan endo-b-1,4-galactosidase; glucan endo-b-1,3-glucosidase; glucan exo-b-1,3-glucosidase; hyaluronan endo-b-1,4-N-acetylglucosaminidase; i-carrageenan endo-…	0	2	3	2	2	2	2	3	0	0	3	2	2	0	2	6	3	2	2	2	2	1	0	0	1	1	5	2	1
GH16_1	b-1,3-glucanosyltransglucosidase; glucan endo-b-1,3-glucosidase; hyaluronan endo-b-1,4-N-acetylglucosaminidase; MLG endo-b-1,3/4-glucosidase; MLG endo-b-1,4-glucosidase	12	4	4	4	4	4	5	4	5	7	5	4	4	7	5	9	7	1	1	1	7	17	5	6	6	6	11	11	7
GH16_2		12	2	2	2	2	2	2	2	2	2	5	2	2	2	5	6	5	1	1	1	7	9	7	6	4	4	7	6	7
GH16_4	glucan endo-b-1,3-glucosidase	2	1	1	1	1	1	1	1	1	1	2	1	1	1	1	1	1	0	0	0	1	0	0	2	0	0	3	1	2
GH16_19	chitin b-1,3/1,6-glucanosyltransferase	2	2	1	2	2	2	2	2	2	2	1	2	1	2	2	1	1	0	0	0	3	3	3	3	1	1	2	2	4
GH17	abscisate b-glucosidase; b-1,3-glucanosyltransglucosidase; glucan endo-b-1,3-glucosidase; glucan exo-b-1,3-glucosidase; laminarin b-1,6-glucanosyltransglucosidase; MLG endo-b-1,4-glucosidase	6	1	1	1	1	1	1	1	1	1	1	1	1	1	1	3	1	3	3	3	6	5	5	4	3	3	2	4	4
GH18	b-N-acetylhexosaminidase; chitin endo-b-1,4-N-acetylglucosaminidase; chitin exo-b-1,4-N-acetylglucobiosaminidase; chitin exo-b-1,4-N-acetylglucosaminidase; chitosan endo-b-1,4-N-glucosaminase; mannosyl-oligosaccharide endo-b-1,4-N-acetylglucosaminidase; mannosyl-oligosaccharide exo-b-1,4-N-acetylglucosaminidase; Nod factor endo-b-1,4-N-acetylglucosaminidase; peptidoglycan endo-b-1,4-N-acetylgluco…	15	6	9	7	7	7	7	7	4	5	6	8	7	4	6	7	7	9	9	9	15	22	11	11	6	6	7	11	8
GH20	antigen b-1,3-lacto-N-biosidase; b-N-Acetyl-(6-sulfo)-glucosaminidase; b-N-acetylgalactosaminidase; b-N-acetylhexosaminidase; mannosyl-oligosaccharide endo-b-1,4-N-acetylglucosaminidase; poly-N-acetylglucose endo-b-1,6-N-acetylglucosaminidase	3	2	2	2	2	2	2	3	2	2	2	2	2	2	2	1	1	2	2	2	3	3	2	2	0	0	2	2	2
GH23	chitin endo-b-1,4-N-acetylglucosaminidase; peptidoglycan endo-b-1,4-N-acetylmuramidase; peptidoglycan lytic b-1,4-muraminidase	2	2	2	2	2	2	2	2	2	2	2	2	2	2	1	1	0	2	2	2	2	1	1	4	6	5	1	3	2
GH25	peptidoglycan endo-b-1,4-N-acetylmuramidase	0	0	0	0	0	0	0	0	0	0	0	0	0	0	0	0	0	0	0	0	1	0	0	0	0	0	0	1	1
GH26	cellulose endo-b-1,4-glucosidase; mannan endo-b-1,4-mannosidase; mannan exo-b-1,4-mannobiosidase; MLG endo-b-1,4-glucosidase; MLX exo-b-1,4-xylosidase; xylan endo-b-1,3-xylosidase; xyloglucan endo-b-1,4-glucosidase	3	1	1	1	1	1	1	1	1	2	1	1	1	1	1	1	1	1	1	1	2	3	3	2	3	2	1	1	3
GH27	a-galactosidase; antigen a-1,3-N-acetylgalactosaminidase; b-L-arabinopyranosidase; dextran exo-a-1,6-glucobiosidase; galactan:galactan galactosyltransferase; galactomannan exo-a-1,6-galactosidase	2	0	0	0	0	0	0	0	0	0	0	0	0	0	0	0	0	0	0	0	0	1	0	0	0	0	0	0	0
GH28	galacturonan endo-a-1,4-galacturonidase; galacturonan exo-a-1,4-galacturobiodase; galacturonan exo-a-1,4-galacturonidase; rhamnogalacturonan I endo-a-1,2-galacturonidase; rhamnogalacturonan I exo-a-1,2-galacturonidase; xylogalacturonan endo-a-1,4-galacturonidase	11	1	1	1	1	1	1	1	0	0	1	0	1	0	2	0	0	6	6	6	1	10	1	0	0	0	4	1	0
GH31	1,4-a-glucan 6-a-glucosyltransferase; a-(6-sulfo)-quinovosidase; a-galactosidase; a-glucosidase; a-mannosidase; a-xylosidase; cyclobis-(1,6)-a-nigerose a-1,3-glucosidase; dextran endo-a-1,6-glucosidase; Exo-1,4-a-D-glucan lyase; exo-a-1,4-galactosidase; glucan exo-a-1,3-glucosidase; isomaltosyltransferase; mannosyl-oligosaccharide exo-a-1,3-glucosidase; oligo exo-a-1,6-glucosidase; oligosaccharid…	1	0	0	0	0	0	0	0	0	0	0	0	0	0	0	0	0	1	1	1	1	2	1	1	0	0	1	1	0
GH31_1	a-glucosidase; a-mannosidase; a-xylosidase; glucan exo-a-1,3-glucosidase; mannosyl-oligosaccharide exo-a-1,3-glucosidase; oligo exo-a-1,6-glucosidase; sucrose a-1,2-glucosidase	1	1	1	1	1	1	1	1	1	1	1	1	1	1	1	1	1	1	1	1	1	2	1	1	1	1	1	1	1
GH31_3	a-glucosidase; a-xylosidase	1	0	0	0	0	0	0	0	0	0	0	0	0	0	0	0	0	0	0	0	0	0	0	0	0	0	0	0	0
GH32	2,1-fructan:2,1-fructan 1-fructosyltransferase; 6-kesose b-2,6-fructose; 6G-fructosyltransferase; cycloinulo-oligosaccharide fructanotransferase; inulin endo-b-2,1-fructosidase; inulin exo-b-2,1-fructosidase; levan endo-b-2,6-fructosidase; levan exo-b-2,6-fructobiosidase; levan exo-b-2,6-fructosidase; levansucrase; sucrose 6 acetate b-2,1-fructosyltransferase; sucrose b-2,1-fructosidase; sucrose:…	1	1	1	1	1	1	1	1	1	1	1	1	1	1	1	1	1	0	0	0	1	1	1	0	0	0	1	1	0
GH35	antigen exo-b-1,3-galactosidase; b-1,2-glucan synthetase (elongation); b-galactosidase; chitosan exo-b-1,4-N-glucosaminase; galactan exo-b-1,4-galactosidase; glucan exo-b-1,2-glucobiosidase	2	0	0	0	0	0	0	0	0	0	0	0	0	0	0	0	0	0	0	0	1	2	0	0	0	0	0	0	0
GH36	a-galactosidase; antigen a-1,3-galactosidase; antigen a-1,3-N-acetylgalactosaminidase; antigen exo-a-1,3-galactosamine; b-L-arabinopyranosidase; galactinol-raffinose galactosyltransferase; galactinol-sucrose galactosyltransferase; melibiose a-1,6-galactosidase; raffinose exo-a-1,6-galactosidase	1	1	1	1	1	1	1	1	1	1	0	1	1	1	1	1	1	3	3	3	1	1	1	1	1	1	1	0	0
GH37	trehalose a-1,1-glucosidase	1	1	1	1	1	1	1	1	1	1	1	1	1	1	1	1	1	1	1	1	1	1	1	1	1	1	1	1	1
GH38	a-mannosidase; mannosyl-oligosaccharide endo-a-1,P-mannosidase; mannosyl-oligosaccharide exo-a-1,2-mannosidase; mannosyl-oligosaccharide exo-a-1,3-mannosidase; mannosyl-oligosaccharide exo-a-1,6-mannosidase	1	2	2	2	2	1	2	2	1	1	1	2	2	1	1	2	2	1	1	1	2	2	3	2	1	1	2	2	1
GH43_5	arabinan endo-a-1,5-arabinofuranosidase; arabinan exo-a-1,5-L-arabinofuranosidase	8	0	0	0	0	0	0	0	0	0	1	0	0	0	1	0	0	0	0	0	5	4	0	0	0	0	0	0	1
GH43_13		1	0	0	0	0	0	0	0	0	0	0	0	0	0	0	0	0	0	0	0	0	0	0	0	0	0	0	0	0
GH43_14	a-L-arabinofuranosidase; xylan exo-b-1,4-xylosidase	0	0	0	0	0	0	0	0	0	0	0	0	0	0	0	0	0	1	1	1	0	0	0	0	0	0	1	0	0
GH43_30	b-galactofuranosidase	2	0	0	0	0	0	0	0	0	0	0	0	0	0	0	0	0	0	0	0	0	3	0	0	0	0	0	0	0
GH43_37	arabinan endo-a-1,5-arabinofuranosidase; b-galactofuranosidase	3	0	0	0	0	0	0	0	0	0	0	0	0	0	0	0	0	0	0	0	1	0	0	0	0	0	0	0	0
GH47	mannosyl-oligosaccharide exo-a-1,2-mannosidase	6	3	3	3	3	3	3	4	3	3	3	3	3	3	3	3	4	3	3	3	4	5	7	5	5	7	4	3	4
GH51_1	a-L-arabinofuranosidase; a-L-arabinopyranosidase; arabinan exo-a-1,2-L-arabinofuranosidase; arabinan exo-a-1,3-L-arabinofuranosidase; arabinoxylan exo-a-1,3-L-arabinofuranosidase; cellulose exo-b-1,4-glucobiosidase	1	0	0	0	0	0	0	0	0	0	0	0	0	0	0	0	0	0	0	0	1	1	0	0	0	0	2	1	0
GH51_2	a-L-arabinofuranosidase; xylan exo-b-1,4-xylosidase	1	0	0	0	0	0	0	0	0	0	0	0	0	0	0	0	0	0	0	0	0	1	0	0	0	0	0	0	0
GH53	arabinogalactan endo-b-1,4-galactosidase	1	0	0	0	0	0	0	0	0	0	0	0	0	0	0	0	0	0	0	0	0	0	0	0	0	0	0	0	0
GH55_2	glucan endo-b-1,3-glucosidase; glucan exo-b-1,3-glucosidase; laminarin endo-b-1,3-glucosidase	3	0	0	0	0	0	0	0	0	0	0	0	0	0	0	0	0	0	0	0	0	1	0	0	0	0	0	0	0
GH63	a-glucosidase; glucan exo-a-1,3-glucosidase; glycerate a-mannosidase; glycerate exo-a-glucosidase; mannosyl-oligosaccharide exo-a-1,2-glucosidase	1	1	1	1	1	1	1	1	1	1	1	1	1	1	1	1	1	3	3	3	1	1	1	1	1	1	1	1	1
GH65	a-1,3-glucan phosphorylase; a-1,3-glucosyl-L-rhamnose phosphorylase; a-glucan phosphorylase; a-glucosyl-glycerol phosphorylase; branched-dextran exo-1,2-a-glucosidase; hydroxylysine exo-a-1,2-glucosidase; kojibiose a-1,2-glucosidase; kojibiose phosphorylase; maltose phosphorylase; nigeriose phosphorylase; trehalose 6-phosphate phosphorylase; trehalose a-1,1-glucosidase; trehalose phosphorylase	1	1	1	1	1	1	1	1	1	1	1	1	1	1	1	1	1	0	0	0	1	1	1	0	0	0	1	1	1
GH71	glucan endo-a-1,3-glucosidase	6	1	1	1	0	1	1	1	0	0	1	1	1	0	1	1	1	0	0	0	1	8	1	2	0	0	2	1	2
GH75	chitosan endo-b-1,4-N-glucosaminase	0	1	1	1	1	1	1	1	0	0	1	1	1	0	1	1	1	0	0	0	1	3	1	1	0	0	0	1	1
GH76	a-glucosidase; mannan endo-a-1,6-mannosidase	2	1	1	1	1	1	1	1	1	1	1	1	1	1	1	0	0	1	1	1	3	3	1	2	0	0	1	2	2
GH78	a-rhamnosidase; isoflavone 7-O-glucosyl a-1,6-rhamnosidase; rhamnogalacturonan I exo-a-1,4-rhamnosidase	2	1	1	1	1	1	1	1	2	2	1	1	1	2	0	0	0	0	0	0	2	3	1	0	0	0	2	0	1
GH79	arabinogalactan exo-b-1,6-(4-OMethyl)-glucuronidase; b-glucuronidase; baicalin b-glucuronidase; glycyrrhizin b-glucuronidase; heparan sulfate endo-b-1,4-glucuronidase; hyaluronan endo-b-1,3-glucuronidase	2	0	0	0	0	0	0	0	0	0	0	0	0	0	0	0	0	0	0	0	0	1	0	0	0	0	0	1	0
GH85	mannosyl-oligosaccharide endo-b-1,4-N-acetylglucosaminidase	0	1	1	1	1	1	1	1	1	1	1	2	1	1	1	1	0	1	1	1	1	0	1	1	1	1	1	1	0
GH88	chondoitin sulfate unsaturated-b-1,3-glucuronidase; gellan unsaturated-b-1,4-glucuronidase; unsaturated-b-glucuronidase	4	1	1	1	1	1	1	1	1	1	0	1	1	1	0	0	0	0	0	0	1	4	1	3	0	0	1	1	1
GH89	a-N-acetylglucosaminidase	1	0	0	0	0	0	0	0	0	0	0	0	0	0	0	0	0	0	0	0	0	0	0	0	0	0	0	0	0
GH95	a-1,2-L-galactosidase; a-fucosidase; exo-a-1,2-fucosidase	0	0	0	0	0	0	0	0	0	0	0	0	0	0	0	0	0	0	0	0	0	1	0	1	0	0	0	0	0
GH105	homogalacturonan unsaturated-a-1,4-galacturonidase; rhamnogalacturonan I unsaturated-a-1,2-galacturonidase; unsaturated-b-glucuronidase	1	0	0	0	0	0	0	0	0	0	0	0	0	0	0	0	0	0	0	0	0	1	0	0	0	0	0	0	0
GH106	a-rhamnosidase; rhamnogalacturonan I exo-a-1,4-rhamnosidase	1	0	0	0	0	0	0	0	0	0	0	0	0	0	0	0	0	0	0	0	1	0	0	0	0	0	1	0	0
GH114	endo-a-1,4-N-galactosaminidase	0	0	0	0	0	0	0	0	0	0	0	0	0	0	0	0	0	0	0	0	2	0	2	1	0	0	0	0	1
GH125	mannosyl-oligosaccharide exo-a-1,6-mannosidase	0	0	0	0	0	0	0	0	0	0	0	0	0	0	0	0	0	1	1	1	1	1	1	0	0	0	1	1	0
GH127	b-carrageenan exo-a-1,3-anhydro-galactosidase; b-L-arabinofuranosidase; hydroxyproline exo-b-1,2-arabinofunosidase; rhamnogalacturonan II endo-a-1,3-aceric acid hydrolase	1	0	0	0	0	0	0	0	0	0	0	0	0	0	0	0	0	0	0	0	0	0	0	0	0	0	0	0	0
GH128	glucan endo-b-1,3-glucosidase; glucan exo-b-1,3-glucosidase	4	2	2	2	2	2	2	2	2	3	1	2	2	3	2	2	1	1	1	1	6	4	2	1	2	2	3	6	4
GH130	b-1,2-mannan phosphorylase; b-1,2-mannobiose phosphorylase; b-1,3-mannan phosphorylase; b-1,4-mannan phosphorylase; b-1,4-mannosyl-glucose phosphorylase; b-1,4-mannosyl-N-acetyl-glucosamine phosphorylase; b-mannan exo-b-1,2-mannosidase; b-mannoside phosphorylase	1	0	0	0	0	0	0	0	0	0	0	0	0	0	0	0	0	0	0	0	0	0	0	0	0	0	0	0	0
GH131	b-glucosidase; glucan exo-b-1,3-glucosidase	0	0	0	0	0	0	0	0	0	0	0	0	0	0	0	0	0	0	0	0	0	0	0	0	0	1	0	0	0
GH133	glycogen exo-a-1,6-glucosidase	1	1	1	1	1	1	1	1	1	1	1	1	1	1	1	1	1	1	1	1	1	1	3	1	1	1	1	1	1
GH135	poly-N-acetylgalactose endo-a-1,4-N-acetylgalactosaminidase	2	1	1	2	1	2	2	0	0	0	2	2	2	0	1	1	1	0	0	0	1	1	0	0	0	0	4	1	3
GH140	rhamnogalacturonan II endo-b-1,2-apiosidase	1	0	0	0	0	0	0	0	0	0	0	0	0	0	0	0	0	0	0	0	2	0	1	0	0	0	3	0	0
GH152	glucan endo-b-1,3-glucosidase	5	4	4	4	4	3	4	4	3	2	3	4	4	3	4	5	5	0	0	0	6	12	3	1	3	3	6	5	3
GH154	allolactose exo-b-1,6-galactosidase; gum arabic exo-b-1,6-glucuronidase	1	0	0	0	0	0	0	0	0	0	0	0	0	0	0	0	0	0	0	0	0	1	0	0	0	0	0	0	0
GH_nc		6	6	6	6	9	6	6	4	6	6	7	5	6	6	8	7	5	8	8	8	7	9	9	15	8	8	8	7	0
PL1	exo-unsaturated disaccharide pectate lyase; pectate lyase; pectin lyase; poly a-D-N-acetylgalactosaminuric acid lyase	0	0	0	0	0	0	0	0	0	0	1	0	0	0	1	0	0	0	0	0	0	0	0	0	0	0	0	0	0
PL4	rhamnogalacturonan lyase	0	0	0	0	0	0	0	0	0	0	0	0	0	0	0	0	0	0	0	0	0	0	0	0	0	1	0	0	0
PL4_1	rhamnogalacturonan lyase	0	0	0	0	0	0	0	0	0	0	0	0	0	0	0	0	0	0	0	0	0	0	0	0	1	0	0	0	0
PL14	alginate lyase (unspecified); endo-b-D-mannuronate-alginate lyase; exo-polyGM-alginate lyase; exo-polyMG-alginate lyase; glucuronan lyase	3	2	2	2	2	2	2	2	0	3	3	2	1	3	0	3	1	1	1	1	5	0	5	1	1	1	4	3	1
PL14_3	endo-b-D-mannuronate-alginate lyase	0	0	0	0	0	0	0	0	2	0	1	0	1	0	1	1	0	1	1	1	0	2	0	2	0	0	1	0	0
PL14_5		1	1	1	1	1	1	1	1	0	0	0	1	1	0	3	0	0	0	0	0	0	4	0	0	0	0	0	1	1
PL35	chondroitin lyase/chondroitinase; heparin-sulfate lyase; hyaluronate lyase	4	1	1	1	1	1	1	1	1	1	1	1	1	1	1	1	1	2	2	2	2	5	2	2	2	2	2	2	2
PL38	endo-b-D-mannuronate-alginate lyase; endo-polyGM-alginate lyase; endo-polyMG-alginate lyase; exo-b-1,4-glucuronan lyase; glucuronan lyase; guluronate-specific alginate lyase	3	0	0	0	0	0	0	0	0	0	0	0	0	0	0	0	0	0	0	0	1	3	3	3	1	1	0	0	1
PL42	L-rhamnose-a-1,4-D-glucuronate lyase	0	0	0	0	0	0	0	0	0	0	0	0	0	0	0	0	0	0	0	0	1	1	0	0	0	0	1	0	0
GT1	2-hydroxyflavanone C-glucosyltransferase; a-L-noviosyltransferase; a-L-rhodinosyltransferase; anthocyanidin 3-O-glucosyltransferase; b-1,2-glucosyltransferase; b-olivosyltransferase; C-glycosyltransferase; Flavonol-3-O-glucoside L-rhamnosyltransferase; Hexosyltransferases; indole-3-acetate b-glucosyltransferase; isoflavone 7-O-glucosyltransferase; Kaempferol 3-O-galactosyltransferase; Pentosyltra…	11	3	3	3	3	3	3	3	3	3	3	3	3	3	3	3	2	3	3	3	6	13	5	5	6	5	5	7	5
GT2	b-1,3-galactosyltransferase; a-1,3-rhamnosyltransferase (unspecified donor); a-1,4-L-fucosyltransferase; a-1,6-L-fucosyltransferase; alternating b-1,3/4-N-acetylmannan synthase; arabinoglucan synthase; b-1,3-1,4-glucan synthase; b-1,3-glucosyltransferase; b-1,3-N-acetylglucosaminyltransferase; b-1,4-galactosyltransferase; b-1,4-glucosyltransferase; b-Man-P-decaprenol: a-1,6-mannooligosaccharide a…	16	14	14	14	15	14	14	14	14	14	15	14	14	14	16	16	15	16	16	16	25	20	19	19	14	14	15	18	17
GT3	UDP-Glc glycogen synthase / starch synthase	1	1	1	1	1	1	1	1	1	1	1	1	1	1	2	1	1	1	1	1	1	1	1	1	1	1	1	2	1
GT4	1L-myo-inositol-1-P a-N-acetylglucoaminyltransferase; a-1,2-mannosyltransferase; LPS a-1,6-galactosyltransferase; UDP-Glc: tetrahydrobiopterin a-glucosyltransferase; a,a-trehalose phosphorylase (configuration-retaining); a-1,2-galactosyltransferase; a-1,2-N-acetylgalactosaminyltransferase; a-1,3-galactosyltransferase; a-N-acetylglucosaminyltransferase; a-xylosyltransferase; ADP-Glc glycogen synth…	4	7	7	7	8	7	7	7	8	8	9	8	7	9	10	8	6	8	8	8	11	8	6	6	4	4	6	7	4
GT5	a-1,3-glucan synthase; a-1,4-glucan synthase; ADP-Glc glycogen synthase / starch synthase; NDP-Glc: starch glucosyltransferase; pullulan synthase; UDP-Glc glycogen synthase / starch synthase	4	0	0	0	0	0	1	0	0	0	0	0	0	0	0	0	0	0	0	0	1	2	0	0	0	0	0	3	1
GT8	a-1,3-galactosyltransferase; a-glucosyltransferase; b-1,3-N-acetylglucosaminyltransferase; chiro-inositol 1-a-galactosyltransferase / fagopyritol synthase; Hexosyltransferases; homogalacturonan a-1,4-galacturonosyltransferase; LPS 3-a-galactosyltransferase; UDP-Gal a-galactosyltransferase; UDP-Gal: myo-inositol 3-a-galactosyltransferase; UDP-Gal:glucoside a-1,3-galactosyltransferase; UDP-Glc: LOS…	5	3	3	3	3	3	3	3	4	5	5	3	3	5	3	2	2	3	3	3	7	3	6	3	3	4	3	5	4
GT10	3-galactosyl-N-acetylglucoside 4-a-L-fucosyltransferase; 4-galactosyl-N-acetylglucoside 3-a-L-fucosyltransferase; glycoprotein 3-a-L-fucosyltransferase	0	3	2	3	3	2	3	3	0	0	1	2	3	0	1	1	1	1	1	1	1	3	11	1	2	1	4	0	3
GT14	b-1,3-galactosyl-O-glycosyl-glycoprotein b-1,6-N-acetylglucosaminyltransferase; peptide O-b-xylosyltransferase; UDP-GlcA: b-1,3-galactan b-1,6-glucuronosyltransferase; UDP-GlcA: b-1,6-galactan b-1,6-glucuronosyltransferase; UDP-GlcNAc: N-acetyllactoside b-1,6-N-acetylglucosaminyltransferase	0	0	0	0	0	0	0	0	0	0	1	0	0	0	0	2	1	0	0	0	0	0	0	0	0	0	0	0	0
GT15	GDP-Man: a-1,2-mannosyltransferase; GDP-Man: Man3GlcNAc2-PP-dolichol/Man4GlcNAc2-PP-dolichol a-1,2-mannosyltransferase	5	4	4	4	4	4	4	4	4	4	5	4	4	4	5	4	4	3	3	3	8	9	4	4	3	3	4	3	4
GT17	UDP-GlcNAc: b-1,4-mannosyl-glycoprotein b-1,4-N-acetylglucosaminyltransferase	1	1	1	1	1	1	1	1	1	2	1	2	1	1	1	1	1	1	1	1	1	1	1	1	1	1	1	2	1
GT20	a,a-trehalose-6-phosphate synthase (GDP-forming); a,a-trehalose-6-phosphate synthase (UDP-forming); Glucosylglycerol-phosphate synthase; trehalose-6-P phosphatase; [retaining] GDP-valeniol: validamine 7-phosphate valeniolyltransferase	1	3	3	2	2	2	2	2	2	2	2	3	3	2	2	2	2	3	3	3	2	2	3	3	2	2	2	3	2
GT21	Hexosyltransferases; UDP-Glc: ceramide b-glucosyltransferase	2	1	1	1	1	1	1	1	1	1	1	1	1	1	1	1	1	1	1	1	1	1	1	1	1	1	1	1	1
GT22	Dol-P-Man: Man2-GlcNAc-phosphatidylinositol a-1,2-mannosyltransferase; Dol-P-Man: Man3-GlcNAc-phosphatidylinositol a-1,2-mannosyltransferase; Dol-P-Man: Man6GlcNAc2-PP-Dol a-1,2-mannosyltransferase; Dol-P-Man: Man7GlcNAc2-PP-Dol a-1,6-mannosyltransferase; Dol-P-Man: Man8GlcNAc2-PP-Dol a-1,2-mannosyltransferase	4	4	4	4	4	4	4	5	4	4	4	4	4	4	4	4	4	3	3	3	4	4	4	4	4	4	4	4	4
GT24	Hexosyltransferases; UDP-Glc: glycoprotein a-glucosyltransferase	1	1	1	1	1	1	1	1	1	1	1	1	1	1	1	1	1	1	1	1	1	1	1	1	1	1	1	1	1
GT28	digalactosyldiacylglycerol synthase; monogalactosyldiacylglycerol synthase; UDP-Glc: 1,2-diacylglycerol 3-glucosyltransferase; UDP-GlcNAc: undecaprenyldiphospho-muramoylpentapeptide b-1,4-N-acetylglucosaminyltransferase	0	0	0	0	0	0	0	0	0	0	0	0	0	0	0	0	0	0	0	0	0	0	0	0	0	0	0	1	0
GT31	b-1,3-galactosyltransferase; b-1,3-glucosyltransferase; UDP-Gal: b-1,3-galactan b-1,3-galactosyltransferase; UDP-Gal: b-1,6-galactan b-1,6-galactosyltransferase; UDP-Gal: b-galactosylxylosylprotein b-1,3-galactosyltransferase; UDP-Gal: glycoprotein-N-acetylgalactosamine b-1,3-galactosyltransferase; UDP-Gal: glycosaminoglycan b-1,3-galactosyltransferase; UDP-Gal: mannosylinositolphosphoceramide b-…	7	5	5	5	5	5	5	5	5	5	4	6	4	5	6	5	4	5	5	5	6	5	6	6	4	4	5	5	5
GT32	a-1,4-N-acetylgalactosaminyltransferase; a-1,4-N-acetylglucosaminyltransferase; a-glucosyltransferase; a-N-acetylglucosaminyltransferase; GDP-Man: a-1,3-mannosyltransferase; GDP-Man: a-1,6-mannosyltransferase; GDP-Man: inositol-phosphorylceramide a-mannosyltransferase; GDP-Man: Man2GlcNAc2-PP-dolichol a-1,6-mannosyltransferase; Hexosyltransferases; UDP-Gal: b-galactoside a-1,4-galactosyltransfera…	8	3	3	3	3	3	3	3	3	3	4	3	3	3	3	3	1	6	6	6	7	6	3	3	3	3	4	5	4
GT33	GDP-Man: chitobiosyldiphosphodolichol b-1,4-mannosyltransferase	1	1	1	1	1	1	1	1	1	1	1	1	1	1	1	1	1	1	1	1	1	1	1	1	1	1	1	1	1
GT34	galactomannan a-1,6-galactosyltransferase; a-1,2-galactosyltransferase; UDP-Gal: galactoglucomannan a-1,6-galactosyltransferase; UDP-Xyl: xyloglucan a-1,6-xylosyltransferase	0	0	0	0	0	0	0	0	0	0	0	0	0	0	0	0	0	0	0	0	0	0	0	0	0	0	0	0	1
GT35	[retaining] a-1,4-glucan phosphorylase	1	1	1	1	1	1	1	1	1	1	1	2	1	1	3	1	1	1	1	1	1	1	1	1	1	1	1	1	1
GT39	Dol-P-Man:protein mannosyltransferase	3	3	3	3	3	4	3	3	3	3	3	3	3	3	3	3	3	3	3	3	4	4	3	3	3	3	3	3	2
GT41	GDP-L-Fuc: protein O-a-L-fucosyltransferase; UDP-Glc: peptide N-b-glucosyltransferase; UDP-GlcNAc: protein O-b-N-acetylglucosaminyltransferase	1	1	1	1	1	1	1	1	1	1	1	1	1	1	1	1	1	1	1	1	1	1	1	1	1	1	1	1	1
GT43	Glycosyltransferases; UDP-GlcA: b-1,4-galactosyl-xylosylprotein b-1,3-glucuronosyltransferase; UDP-Xyl: xylan b-1,4-xylosyltransferase	0	1	1	1	1	1	1	1	1	1	1	1	1	1	0	0	0	0	0	0	0	0	1	1	0	0	1	0	0
GT47	a-1,3-L-arabinofuranosyltransferase; arabinan a-1,5-L-arabinofuranosyltransferase; glucomannan b-1,2-galactosyltransferase; glucuronoxylan a-1,2-arabinosyltransferase; glucuronoxylan b-1,2-galactosyltransferase; pectin b-1,4-glucuronyltransferase; UDP-GlcA: N-acetylglucosaminyl-proteoglycan b-1,4-glucuronosyltransferase; UDP-Xyl: xylan b-1,4-xylosyltransferase; xylogalacturonan b-1,3-xylosyltrans…	9	4	4	4	4	4	4	4	3	3	2	4	4	3	3	3	1	3	3	3	6	5	4	4	4	4	5	4	2
GT48	UDP-Glc: b-1,3-glucan synthase / callose synthase	1	1	1	1	1	1	1	1	1	1	1	1	1	1	1	1	1	1	1	1	1	1	1	1	1	1	1	1	2
GT49	a-glucuronyltransferase	2	2	2	2	2	2	2	2	2	2	2	2	2	2	2	1	1	2	2	2	2	2	2	2	1	2	2	3	2
GT50	Dol-P-Man a-1,4-mannosyltransferase	1	1	1	1	1	1	1	1	1	1	1	1	1	1	1	1	1	1	1	1	1	2	1	1	1	1	1	1	1
GT57	dolichyl-P-Glc:Glc1Man9GlcNAc2-PP-dolichol a-1,3-glucosyltransferase; dolichyl-P-Glc:Man9GlcNAc2-PP-dolichol a-1,3-glucosyltransferase	2	2	2	2	2	2	2	2	2	2	2	2	2	2	2	2	2	2	2	2	2	2	2	2	2	2	2	2	2
GT58	Dol-P-Man: Man5GlcNAc2-PP-Dol a-1,3-mannosyltransferase	1	1	1	1	1	1	1	1	1	1	1	1	1	1	1	1	1	1	1	1	1	1	1	1	1	1	1	1	1
GT59	Dol-P-Glc: Glc2Man9GlcNAc2-PP-Dol a-1,2-glucosyltransferase	1	1	1	1	1	1	1	1	1	1	1	1	1	1	1	1	1	1	1	1	1	1	1	1	2	1	1	1	1
GT62	a-1,2-mannosyltransferase; GDP-Man: Man2GlcNAc2-PP-dolichol a-1,6-mannosyltransferase; [retaining] GDP-Man: [a-core-mannan] a-1,6-mannosyltransferase	4	2	2	2	2	2	2	2	2	2	2	2	2	2	2	0	0	3	3	3	2	2	4	3	0	0	3	4	1
GT64	a-mannosyltransferase; glucuronosyl-N-acetylglucosaminyl-proteoglycan a-1,4-N-acetylglucosaminyltransferase; glucuronyl-galactosyl-proteoglycan 4-a-N-acetylglucosaminyltransferase	4	3	3	3	3	3	3	3	3	4	5	3	3	4	1	2	0	1	1	1	5	3	3	7	2	2	4	3	3
GT66	dolichyl-diphosphooligosaccharideâ€”protein glycotransferase; dolichyldiphosphooligosaccharide-protein oligosaccharyltransferase ; Undecaprenyl-diphosphooligosaccharide--protein glycotransferase	1	1	1	1	1	1	1	1	1	1	1	1	1	1	1	1	1	1	1	1	1	1	1	1	1	1	1	1	1
GT69	GDP-Man: a-1,3-mannosyltransferase	4	4	4	4	5	3	4	4	3	3	2	4	4	3	3	3	2	2	2	2	4	7	5	6	3	2	3	3	5
GT71	a-mannosyltransferase	8	3	3	3	4	3	3	3	4	4	2	3	3	4	4	4	2	2	2	2	4	6	4	4	4	4	3	5	4
GT76		1	1	0	1	1	1	1	1	1	1	1	1	1	1	1	1	0	1	1	1	1	1	1	1	1	1	1	1	1
GT77	a-1,3-xylosyltransferase; b-L-arabinofuranosyltransferase; fucosylgalactoside 3-a-galactosyltransferase	0	1	1	1	1	1	1	1	0	0	0	1	1	0	0	0	0	0	0	0	0	0	7	7	0	0	3	0	0
GT90	(mannosyl) glucuronoxylomannan/galactoxylomannan b-1,2-xylosyltransferase; [inverting] UDP-Glc: protein O-b-glucosyltransferase; [inverting] UDP-Xyl: protein O-b-xylosyltransferase	15	9	9	9	9	9	9	9	11	9	12	9	9	9	9	8	9	11	11	11	13	11	13	11	11	11	12	9	13
GT_nc		9	7	6	7	8	8	7	5	10	7	10	8	8	8	8	6	1	9	8	9	9	8	9	11	5	4	10	8	0
CE4	acetylesterase; acetylxylan esterase; chitin deacetylase; chitin oligosaccharide deacetylase; LPS deacetylase; peptidoglycan N-acetylglucosamine deacetylase; poly-b-1,6-N-acetylglucosamine deacetylase	17	6	6	8	6	8	8	6	7	6	7	7	8	7	7	5	5	9	9	9	20	19	12	8	6	6	11	7	18
CE5	acetylxylan esterase; cutinase; Triacylglycerol lipase	5	1	1	1	1	1	1	1	0	0	2	1	1	0	3	0	0	0	0	0	0	2	0	0	0	0	0	0	0
CE8	pectin methylesterase	4	0	0	0	0	0	0	0	0	0	0	0	0	0	0	0	0	5	5	6	0	4	0	0	0	0	2	0	0
CE9	N-acetylglucosamine-6-phosphate deacetylase	1	0	0	0	0	0	0	0	0	0	0	0	0	0	0	0	0	0	0	0	1	1	0	0	0	0	2	1	1
CE12	acetylxylan esterase; Carboxylic ester hydrolase; pectin acetylesterase; rhamnogalacturonan acetylesterase	2	0	0	0	0	0	0	0	0	0	0	0	0	0	0	0	0	0	0	0	0	0	0	0	0	0	0	0	0
CE16	acetylesterase	17	1	2	0	1	1	2	1	3	2	3	2	2	2	3	2	2	2	2	2	4	6	0	0	0	0	4	4	1
CE_nc		5	0	1	2	2	3	2	0	1	2	0	1	0	2	3	0	1	2	2	2	3	2	5	5	0	0	0	5	0
CBM1	carbohydrate binding; cellohexaose binding; cellulose binding; cellulose binding (A-type); chitin binding (A-type)	3	10	8	10	10	10	10	4	5	7	6	9	8	7	5	0	0	0	0	0	9	14	21	13	4	0	6	3	8
CBM18	carbohydrate binding; chitin binding; chitooligosaccharide binding; chitotriose binding; N-acetylglucosamine binding	0	2	2	2	2	2	2	2	2	2	1	2	1	2	1	2	0	0	0	0	4	5	46	14	1	1	2	1	0
CBM20	amylose binding; glycogen binding; maltooligosaccharide binding; maltose binding; starch binding	2	0	0	0	0	0	0	0	0	0	0	0	0	0	0	1	1	0	0	0	3	7	1	1	1	1	1	0	0
CBM21	cyclodextrin binding; glycogen binding; isomaltooligosaccharide binding; starch binding	1	1	1	0	1	1	1	1	1	1	1	1	1	1	1	1	0	2	2	2	1	1	1	1	1	1	1	1	1
CBM32	a-1,3-glucan binding / mutan binding; a-GalNAc-peptide binding / Tn antigen-binding; a-N-acetylglucosamine-1,4-galactoside binding; alginate binding; alginate-derived trisaccharide binding; b-1,3-glucan binding; b-1,4-mannan binding; bGal-1,3-GalNac binding / T-antigen binding (glycan moiety) ; bGalNAc-1,3-Gal binding; bGlcNAc1,2Man binding; chitin binding; chitosan binding; chitosan trisaccharid…	1	1	1	1	1	1	1	1	1	1	1	1	1	1	1	1	1	0	0	0	1	1	1	0	0	0	1	1	1
CBM35	a-1,3-glucan binding / mutan binding; a-1,6-glucan / dextran binding; arabinoxylan binding; b-1,3-galactan binding; b-1,4-mannan (A-Type); b-1,4-mannan binding; b-1,4-mannotriose binding; b-1,4-xylan binding; b-galactomannan binding; b-glucomannan binding; bGlcAp1,2Xyl binding; cycloisomaltooligosaccharide binding; d-4,5-anhydrogalacturonic acid binding; D-galactopyranose binding / galactose bind…	0	0	0	0	0	0	0	0	0	0	0	0	0	0	0	0	0	0	0	0	1	0	0	0	0	0	0	0	0
CBM48	arabinoxylan binding; branched-cyclodextrin binding; cyclodextrin binding; glycogen binding; maltooligosaccharide binding; starch binding	2	3	3	3	3	3	3	3	2	3	2	2	3	3	3	2	2	3	3	3	4	3	4	4	2	2	4	3	1
CBM50	bacterial cell wall-binding; chitin binding; chitooligosaccharide binding; chitotriose binding; D-mannopyranose binding / mannose binding; lipochitooligosaccharide binding; peptidoglycan binding; peptidoglycan fragment binding	1	1	1	1	1	0	1	0	1	1	1	1	1	1	1	1	0	2	2	2	2	4	5	2	3	2	1	2	1
CBM63	cellulose binding (A-type)	1	0	0	0	0	0	0	0	0	0	0	0	0	0	0	0	0	0	0	0	0	1	0	0	0	0	2	0	1
CBM91	arabinoxylan binding; b-1,4-xylan binding	1	0	0	0	0	0	0	0	0	0	0	0	0	0	0	0	0	1	1	1	0	0	0	0	0	0	1	0	0
AA1	laccase / p-diphenol:oxygen oxidoreductase; [copper-containing] dihydrogeodin oxidase	9	4	4	4	4	4	4	3	3	3	1	4	4	4	2	0	0	3	3	3	4	3	1	2	2	2	3	1	3
AA1_2	laccase / p-diphenol:oxygen oxidoreductase	3	1	1	1	1	1	1	1	1	1	1	1	1	1	1	1	1	1	1	1	1	5	1	1	1	1	2	1	2
AA2	ascorbate peroxidase; cytochrome-c peroxidase; lignin peroxidase; manganese peroxidase; Peroxidases; versatile peroxidase	2	2	2	2	2	2	2	0	2	2	2	2	2	2	2	2	2	2	2	2	2	2	2	2	2	2	2	2	2
AA3_1	cellobiose dehydrogenase	0	0	0	0	0	0	0	0	0	0	0	0	0	0	0	0	0	0	0	0	0	0	2	0	0	0	0	0	1
AA3_2	pyranose dehydrogenase; aryl alcohol oxidase; ecdysone oxidase; glucose 1-dehydrogenase (FAD, quinone); glucose 1-oxidase; oligosaccharide dehydrogenase (FAD)	15	3	3	3	3	3	3	3	1	1	4	3	3	1	4	4	4	2	2	2	9	19	9	8	10	10	9	6	6
AA3_3	alcohol oxidase	4	0	0	0	0	0	0	0	0	0	0	0	0	0	0	0	0	3	3	3	2	4	2	1	1	1	2	2	2
AA3_4	pyranose:oxygen 2-oxidoreductase / glucose 2-oxidase	1	0	0	0	0	0	0	0	0	0	0	0	0	0	0	0	0	0	0	0	1	1	0	0	0	0	1	0	0
AA4	vanillyl-alcohol oxidase	3	2	2	2	2	2	2	2	0	0	0	2	2	0	0	0	0	0	0	0	1	9	0	0	0	0	3	1	0
AA5	5-(hydroxymethyl)furfural oxidase; alcohol oxidase; aryl alcohol oxidase; galactose oxidase; glyoxal oxidase; raffinose oxidase	0	0	0	0	0	0	0	0	0	0	1	0	0	0	0	0	0	0	0	0	0	0	0	0	0	0	0	0	0
AA5_1	galactose oxidase; glyoxal oxidase	4	2	2	2	2	2	2	2	2	2	3	2	2	2	4	3	3	8	8	8	5	8	6	6	1	1	5	5	3
AA6	p-benzoquinone reductase (NADPH)	1	1	1	1	1	1	1	2	1	1	1	1	1	1	1	1	1	1	1	1	1	2	1	1	3	3	1	1	1
AA7	cellooligosaccharide dehydrogenase; chitooligosaccharide oxidase; glucooligosaccharide oxidase; xylooligosaccharide oxidase	2	1	1	1	1	1	1	1	1	1	1	1	1	1	0	1	0	3	2	2	0	2	0	1	0	0	0	2	2
AA9	lytic cellulose monooxygenase (C1-hydroxylating); lytic cellulose monooxygenase (C4-dehydrogenating); lytic xylan monooxygenase / xylan oxidase (C1-hydroxylating); lytic xylan monooxygenase / xylan oxidase (C4-dehydrogenating)	2	1	1	1	1	1	1	1	0	0	1	1	1	0	1	1	0	0	0	0	2	0	2	1	7	7	0	1	0
AA11	lytic chitin monooxygenase	2	2	2	2	2	2	2	2	2	2	2	1	2	2	2	2	2	1	1	1	2	2	3	2	7	7	3	3	3
AA14	lytic xylan monooxygenase / xylan oxidase (C1-hydroxylating)	13	3	3	3	3	3	3	3	2	2	3	3	3	2	3	3	3	2	2	2	9	11	11	14	5	5	6	6	9
