# Supplementary material for: Snow- and ice-ecosystem cleaning capability of the pucciniomycotinous yeast Phenoliferia psychrophenolica
Source: Research Square preprint supplement (doi:10.21203/rs.3.rs-5795686/v1), 2025-02-25
Supplement: Supplementary file 7 [file c9d16ebe6700ffad52946f3b.xlsx]

## Sheet:  
Meredithblackwellia eburnea JGI locus Ids of highly similar duplicate (HSD) genes	Pfam domain	Functional annotation based on Pfam domains	Interpro domain	Functional annotation based on Interpro domains
jgi|Mereb1|19467|CE19466_3364; jgi|Mereb1|313099|estExt_Genewise1Plus.C_6_t10383	PF00005, PF01061, PF06422, PF14510; PF01061, PF14510, PF06422, PF00005	ABC transporter, ABC-2 type transporter, CDR ABC transporter, ABC-transporter N-terminal; ABC-2 type transporter, ABC-transporter N-terminal, CDR ABC transporter, ABC transporter	IPR003439, IPR013525, IPR010929, IPR029481; IPR013525, IPR029481, IPR010929, IPR003439	ABC transporter-like, ATP-binding domain, ABC-2 type transporter, transmembrane domain, CDR ABC transporter, ABC-transporter, N-terminal domain; ABC-2 type transporter, transmembrane domain, ABC-transporter, N-terminal domain, CDR ABC transporter, ABC transporter-like, ATP-binding domain
jgi|Mereb1|88119|CE88118_88; jgi|Mereb1|329919|fgenesh1_kg.22_#_15_#_Locus6151v1rpkm22.75; jgi|Mereb1|326922|fgenesh1_kg.11_#_4_#_Locus6151v1rpkm22.75; jgi|Mereb1|329918|fgenesh1_kg.22_#_14_#_Locus6151v1rpkm22.75
jgi|Mereb1|112860|CE112859_1368; jgi|Mereb1|321448|fgenesh1_kg.2_#_71_#_Locus4994v1rpkm31.95
jgi|Mereb1|135666|CE135665_8422; jgi|Mereb1|153645|CE153644_8454
jgi|Mereb1|135795|CE135794_7436; jgi|Mereb1|153510|CE153509_7477	PF08427; PF08427	Armadillo-like helical domain-containing protein 3, C-terminal; Armadillo-like helical domain-containing protein 3, C-terminal	IPR013636; IPR013636	Armadillo-like helical domain-containing protein 3, C-terminal; Armadillo-like helical domain-containing protein 3, C-terminal
jgi|Mereb1|135825|CE135824_8726; jgi|Mereb1|361010|gm1.9932_g	PF03109; PF03109	ABC1 atypical kinase-like domain; ABC1 atypical kinase-like domain	IPR004147; IPR004147	ABC1 atypical kinase-like domain; ABC1 atypical kinase-like domain
jgi|Mereb1|135826|CE135825_1532; jgi|Mereb1|153403|CE153402_1539
jgi|Mereb1|135991|CE135990_6025; jgi|Mereb1|153426|CE153425_6085	PF12423, PF00169, PF16183, PF00498, PF12473, PF00225; PF12423, PF00169, PF16183, PF00498, PF12473, PF00225	Kinesin protein 1B, PH domain, Kinesin-associated, FHA domain, Kinesin protein, Kinesin motor domain; Kinesin protein 1B, PH domain, Kinesin-associated, FHA domain, Kinesin protein, Kinesin motor domain	IPR022140, IPR001849, IPR032405, IPR000253, IPR022164, IPR001752; IPR022140, IPR001849, IPR032405, IPR000253, IPR022164, IPR001752	Kinesin-like KIF1-type, Pleckstrin homology domain, Kinesin-associated, Forkhead-associated (FHA) domain, Kinesin-like, Kinesin motor domain; Kinesin-like KIF1-type, Pleckstrin homology domain, Kinesin-associated, Forkhead-associated (FHA) domain, Kinesin-like, Kinesin motor domain
jgi|Mereb1|136008|CE136007_1964; jgi|Mereb1|319802|estExt_Genewise1Plus.C_280051
jgi|Mereb1|360672|gm1.9594_g; jgi|Mereb1|144036|CE144035_523	PF01380; PF01380	SIS domain; SIS domain	IPR001347; IPR001347	SIS domain; SIS domain
jgi|Mereb1|165306|CE165305_19343; jgi|Mereb1|323471|fgenesh1_kg.4_#_288_#_Locus52v1rpkm1288.01; jgi|Mereb1|320579|fgenesh1_kg.1_#_581_#_Locus52v1rpkm1288.01	PF08240, PF00107; PF08240, PF00107; PF00107, PF08240	Alcohol dehydrogenase GroES-like domain, Zinc-binding dehydrogenase; Alcohol dehydrogenase GroES-like domain, Zinc-binding dehydrogenase; Zinc-binding dehydrogenase, Alcohol dehydrogenase GroES-like domain	IPR013154, IPR013149; IPR013154, IPR013149; IPR013149, IPR013154	Alcohol dehydrogenase-like, N-terminal, Alcohol dehydrogenase-like, C-terminal; Alcohol dehydrogenase-like, N-terminal, Alcohol dehydrogenase-like, C-terminal; Alcohol dehydrogenase-like, C-terminal, Alcohol dehydrogenase-like, N-terminal
jgi|Mereb1|285528|e_gw1.3.311.1; jgi|Mereb1|299065|estExt_Genewise1.C_4_t10305	PF01915, PF14310, PF07691, PF00933; PF07691, PF01915, PF00933, PF14310	Glycosyl hydrolase family 3 C-terminal domain, Fibronectin type III-like domain, PA14 domain, Glycosyl hydrolase family 3 N terminal domain; PA14 domain, Glycosyl hydrolase family 3 C-terminal domain, Glycosyl hydrolase family 3 N terminal domain, Fibronectin type III-like domain	IPR002772, IPR026891, IPR011658, IPR001764; IPR011658, IPR002772, IPR001764, IPR026891	Glycoside hydrolase family 3 C-terminal domain, Fibronectin type III-like domain, PA14 domain, Glycoside hydrolase, family 3, N-terminal; PA14 domain, Glycoside hydrolase family 3 C-terminal domain, Glycoside hydrolase, family 3, N-terminal, Fibronectin type III-like domain
jgi|Mereb1|287435|e_gw1.5.251.1; jgi|Mereb1|303074|estExt_Genewise1.C_11_t10041; jgi|Mereb1|327250|fgenesh1_kg.11_#_332_#_Locus551v1rpkm228.50; jgi|Mereb1|299754|estExt_Genewise1.C_5_t10076	PF00125; PF00125; PF00125; PF00125	Core histone H2A/H2B/H3/H4; Core histone H2A/H2B/H3/H4; Core histone H2A/H2B/H3/H4; Core histone H2A/H2B/H3/H4	IPR007125; IPR007125; IPR007125; IPR007125	Histone H2A/H2B/H3; Histone H2A/H2B/H3; Histone H2A/H2B/H3; Histone H2A/H2B/H3
jgi|Mereb1|293881|e_gw1.20.261.1; jgi|Mereb1|294918|e_gw1.28.12.1	PF07690; PF07690	Major Facilitator Superfamily; Major Facilitator Superfamily	IPR011701; IPR011701	Major facilitator superfamily; Major facilitator superfamily
jgi|Mereb1|294029|e_gw1.20.230.1; jgi|Mereb1|294997|e_gw1.28.35.1	PF01501; PF01501	Glycosyl transferase family 8; Glycosyl transferase family 8	IPR002495; IPR002495	Glycosyl transferase, family 8; Glycosyl transferase, family 8
jgi|Mereb1|295159|e_gw1.33.15.1; jgi|Mereb1|363731|MIX2548_4_98	PF13650; PF13650	Aspartyl protease; Aspartyl protease
jgi|Mereb1|297630|estExt_Genewise1.C_2_t20454; jgi|Mereb1|322277|fgenesh1_kg.2_#_900_#_Locus4806v1rpkm33.56	PF00808; PF00808	Histone-like transcription factor (CBF/NF-Y) and archaeal histone; Histone-like transcription factor (CBF/NF-Y) and archaeal histone	IPR003958; IPR003958	Transcription factor CBF/NF-Y/archaeal histone domain; Transcription factor CBF/NF-Y/archaeal histone domain
jgi|Mereb1|300193|estExt_Genewise1.C_5_t20034; jgi|Mereb1|342615|estExt_fgenesh1_pm.C_50182; jgi|Mereb1|326952|fgenesh1_kg.11_#_34_#_Locus703v1rpkm193.23; jgi|Mereb1|303495|estExt_Genewise1.C_11_t10488	PF16211, PF00125; PF16211, PF00125; PF16211, PF00125; PF16211, PF00125	C-terminus of histone H2A, Core histone H2A/H2B/H3/H4; C-terminus of histone H2A, Core histone H2A/H2B/H3/H4; C-terminus of histone H2A, Core histone H2A/H2B/H3/H4; C-terminus of histone H2A, Core histone H2A/H2B/H3/H4	IPR032454, IPR007125; IPR032454, IPR007125; IPR032454, IPR007125; IPR032454, IPR007125	Histone H2A, C-terminal domain, Histone H2A/H2B/H3; Histone H2A, C-terminal domain, Histone H2A/H2B/H3; Histone H2A, C-terminal domain, Histone H2A/H2B/H3; Histone H2A, C-terminal domain, Histone H2A/H2B/H3
jgi|Mereb1|321881|fgenesh1_kg.2_#_504_#_Locus153v1rpkm609.58; jgi|Mereb1|300871|estExt_Genewise1.C_6_t20040; jgi|Mereb1|325711|fgenesh1_kg.8_#_118_#_Locus1001v1rpkm147.43; jgi|Mereb1|315723|estExt_Genewise1Plus.C_11_t10353; jgi|Mereb1|343445|estExt_fgenesh1_pm.C_110096; jgi|Mereb1|317925|estExt_Genewise1Plus.C_170104; jgi|Mereb1|379389|estExt_Genemark1.C_5_t10339	PF15511; PF15511; PF15511; PF15511; PF15511; PF15511; PF15511	Centromere kinetochore component CENP-T histone fold; Centromere kinetochore component CENP-T histone fold; Centromere kinetochore component CENP-T histone fold; Centromere kinetochore component CENP-T histone fold; Centromere kinetochore component CENP-T histone fold; Centromere kinetochore component CENP-T histone fold; Centromere kinetochore component CENP-T histone fold	IPR035425; IPR035425; IPR035425; IPR035425; IPR035425; IPR035425; IPR035425	CENP-T/Histone H4, histone fold; CENP-T/Histone H4, histone fold; CENP-T/Histone H4, histone fold; CENP-T/Histone H4, histone fold; CENP-T/Histone H4, histone fold; CENP-T/Histone H4, histone fold; CENP-T/Histone H4, histone fold
jgi|Mereb1|305048|estExt_Genewise1.C_150248; jgi|Mereb1|316246|estExt_Genewise1Plus.C_120384	PF07690; PF07690	Major Facilitator Superfamily; Major Facilitator Superfamily	IPR011701; IPR011701	Major facilitator superfamily; Major facilitator superfamily
jgi|Mereb1|306612|estExt_Genewise1.C_200248; jgi|Mereb1|319800|estExt_Genewise1Plus.C_280049	PF15404; PF15404	Pleckstrin homology domain; Pleckstrin homology domain	IPR039486; IPR039486	Mug56/Spo71, PH domain; Mug56/Spo71, PH domain
jgi|Mereb1|306615|estExt_Genewise1.C_200251; jgi|Mereb1|307470|estExt_Genewise1.C_280045	PF01039; PF01039	Carboxyl transferase domain; Carboxyl transferase domain	IPR034733; IPR034733	Acetyl-coenzyme A carboxylase carboxyl transferase subunit beta; Acetyl-coenzyme A carboxylase carboxyl transferase subunit beta
jgi|Mereb1|306621|estExt_Genewise1.C_200257; jgi|Mereb1|350986|estExt_fgenesh1_pg.C_280015	PF00164; PF00164	Ribosomal protein S12/S23; Ribosomal protein S12/S23	IPR006032; IPR006032	Small ribosomal subunit protein uS12; Small ribosomal subunit protein uS12
jgi|Mereb1|360324|gm1.9246_g; jgi|Mereb1|307479|estExt_Genewise1.C_280054	PF03372; PF03372	Endonuclease/Exonuclease/phosphatase family; Endonuclease/Exonuclease/phosphatase family	IPR005135; IPR005135	Endonuclease/exonuclease/phosphatase; Endonuclease/exonuclease/phosphatase
jgi|Mereb1|318905|estExt_Genewise1Plus.C_200209; jgi|Mereb1|307512|estExt_Genewise1.C_280087
jgi|Mereb1|307627|estExt_Genewise1.C_310016; jgi|Mereb1|323373|fgenesh1_kg.4_#_190_#_Locus2499v1rpkm66.24	PF07876; PF07876	Stress responsive A/B Barrel Domain; Stress responsive A/B Barrel Domain	IPR013097; IPR013097	Stress responsive alpha-beta barrel; Stress responsive alpha-beta barrel
jgi|Mereb1|311023|estExt_Genewise1Plus.C_3_t20424; jgi|Mereb1|323021|fgenesh1_kg.3_#_704_#_Locus9721v2rpkm3.19	PF00083; PF00083	Sugar (and other) transporter; Sugar (and other) transporter	IPR005828; IPR005828	Major facilitator, sugar transporter-like; Major facilitator, sugar transporter-like
jgi|Mereb1|312575|estExt_Genewise1Plus.C_5_t20029; jgi|Mereb1|342594|estExt_fgenesh1_pm.C_50161	PF07690; PF07690	Major Facilitator Superfamily; Major Facilitator Superfamily	IPR011701; IPR011701	Major facilitator superfamily; Major facilitator superfamily
jgi|Mereb1|318916|estExt_Genewise1Plus.C_200220; jgi|Mereb1|319824|estExt_Genewise1Plus.C_280073	PF01479, PF00163; PF01479, PF00163	S4 domain, Ribosomal protein S4/S9 N-terminal domain; S4 domain, Ribosomal protein S4/S9 N-terminal domain	IPR002942, IPR001912; IPR002942, IPR001912	RNA-binding S4 domain, Small ribosomal subunit protein uS4, N-terminal; RNA-binding S4 domain, Small ribosomal subunit protein uS4, N-terminal
jgi|Mereb1|318945|estExt_Genewise1Plus.C_200249; jgi|Mereb1|319793|estExt_Genewise1Plus.C_280042	PF16653, PF05222, PF03435; PF16653, PF05222, PF03435	Saccharopine dehydrogenase C-terminal domain, Alanine dehydrogenase/PNT, N-terminal domain, Saccharopine dehydrogenase NADP binding domain; Saccharopine dehydrogenase C-terminal domain, Alanine dehydrogenase/PNT, N-terminal domain, Saccharopine dehydrogenase NADP binding domain	IPR032095, IPR007886, IPR005097; IPR032095, IPR007886, IPR005097	Saccharopine dehydrogenase-like, C-terminal, Alanine dehydrogenase/pyridine nucleotide transhydrogenase, N-terminal, Saccharopine dehydrogenase, NADP binding domain; Saccharopine dehydrogenase-like, C-terminal, Alanine dehydrogenase/pyridine nucleotide transhydrogenase, N-terminal, Saccharopine dehydrogenase, NADP binding domain
jgi|Mereb1|318957|estExt_Genewise1Plus.C_200261; jgi|Mereb1|319759|estExt_Genewise1Plus.C_280003; jgi|Mereb1|319768|estExt_Genewise1Plus.C_280015	PF07690; PF07690; PF07690	Major Facilitator Superfamily; Major Facilitator Superfamily; Major Facilitator Superfamily	IPR011701; IPR011701; IPR011701	Major facilitator superfamily; Major facilitator superfamily; Major facilitator superfamily
jgi|Mereb1|320145|fgenesh1_kg.1_#_147_#_Locus4112v1rpkm40.75; jgi|Mereb1|354124|gm1.3046_g	PF00083; PF00083	Sugar (and other) transporter; Sugar (and other) transporter	IPR005828; IPR005828	Major facilitator, sugar transporter-like; Major facilitator, sugar transporter-like
jgi|Mereb1|321063|fgenesh1_kg.1_#_1065_#_Locus80v1rpkm886.77; jgi|Mereb1|326463|fgenesh1_kg.9_#_449_#_Locus269v1rpkm403.33	PF00171; PF00171	Aldehyde dehydrogenase family; Aldehyde dehydrogenase family	IPR015590; IPR015590	Aldehyde dehydrogenase domain; Aldehyde dehydrogenase domain
jgi|Mereb1|321106|fgenesh1_kg.1_#_1108_#_Locus179v1rpkm535.57; jgi|Mereb1|326612|fgenesh1_kg.10_#_131_#_Locus641v1rpkm205.13; jgi|Mereb1|342275|estExt_fgenesh1_pm.C_40076	PF00702, PF00690, PF00122; PF00690, PF00702, PF00122; PF00702, PF00122, PF00690	haloacid dehalogenase-like hydrolase, Cation transporter/ATPase, N-terminus, E1-E2 ATPase; Cation transporter/ATPase, N-terminus, haloacid dehalogenase-like hydrolase, E1-E2 ATPase; haloacid dehalogenase-like hydrolase, E1-E2 ATPase, Cation transporter/ATPase, N-terminus	-, IPR004014, -; IPR004014, -, -; -, -, IPR004014	-, Cation-transporting P-type ATPase, N-terminal, -; Cation-transporting P-type ATPase, N-terminal, -, -; -, -, Cation-transporting P-type ATPase, N-terminal
jgi|Mereb1|321234|fgenesh1_kg.1_#_1236_#_Locus12167v1rpkm1.28; jgi|Mereb1|321239|fgenesh1_kg.1_#_1241_#_Locus12167v1rpkm1.28
jgi|Mereb1|321457|fgenesh1_kg.2_#_80_#_Locus419v1rpkm282.96; jgi|Mereb1|328043|fgenesh1_kg.14_#_17_#_Locus276v1rpkm392.27; jgi|Mereb1|376267|estExt_Genemark1.C_1_t20156	PF21671; PF21671; PF21671	Protein CPL1-like; Protein CPL1-like; Protein CPL1-like	IPR048661; IPR048661; IPR048661	Protein CPL1-like; Protein CPL1-like; Protein CPL1-like
jgi|Mereb1|322287|fgenesh1_kg.2_#_910_#_Locus727v1rpkm188.73; jgi|Mereb1|322297|fgenesh1_kg.2_#_920_#_Locus727v1rpkm188.73	PF06110; PF06110	Thioredoxin domain-containing protein 17-like, thioredoxin domain; Thioredoxin domain-containing protein 17-like, thioredoxin domain	IPR010357; IPR010357	Thioredoxin domain-containing protein 17-like domain; Thioredoxin domain-containing protein 17-like domain
jgi|Mereb1|322326|fgenesh1_kg.3_#_9_#_Locus6151v1rpkm22.75; jgi|Mereb1|322327|fgenesh1_kg.3_#_10_#_Locus6151v1rpkm22.75; jgi|Mereb1|328551|fgenesh1_kg.15_#_184_#_Locus6151v1rpkm22.75
jgi|Mereb1|323030|fgenesh1_kg.3_#_713_#_Locus492v1rpkm247.16; jgi|Mereb1|330454|fgenesh1_kg.29_#_38_#_Locus327v1rpkm342.42	PF01184; PF01184	GPR1/FUN34/yaaH family; GPR1/FUN34/yaaH family	IPR000791; IPR000791	Acetate transporter GPR1/Ato2/SatP-like; Acetate transporter GPR1/Ato2/SatP-like
jgi|Mereb1|323155|fgenesh1_kg.3_#_838_#_Locus9491v1rpkm4.02; jgi|Mereb1|325093|fgenesh1_kg.6_#_452_#_Locus9491v1rpkm4.02; jgi|Mereb1|327952|fgenesh1_kg.13_#_295_#_Locus9491v1rpkm4.02
jgi|Mereb1|323170|fgenesh1_kg.3_#_853_#_Locus63v1rpkm1084.74; jgi|Mereb1|324383|fgenesh1_kg.5_#_335_#_Locus1009v1rpkm146.61; jgi|Mereb1|325077|fgenesh1_kg.6_#_436_#_Locus3108v2rpkm0.51_PRE; jgi|Mereb1|325710|fgenesh1_kg.8_#_117_#_Locus1620v1rpkm98.58; jgi|Mereb1|327164|fgenesh1_kg.11_#_246_#_Locus664v1rpkm202.12; jgi|Mereb1|327192|fgenesh1_kg.11_#_274_#_Locus664v1rpkm202.12; jgi|Mereb1|328996|fge…	PF00125; PF00125; PF00125; PF00125; PF00125; PF00125; PF00125	Core histone H2A/H2B/H3/H4; Core histone H2A/H2B/H3/H4; Core histone H2A/H2B/H3/H4; Core histone H2A/H2B/H3/H4; Core histone H2A/H2B/H3/H4; Core histone H2A/H2B/H3/H4; Core histone H2A/H2B/H3/H4	IPR007125; IPR007125; IPR007125; IPR007125; IPR007125; IPR007125; IPR007125	Histone H2A/H2B/H3; Histone H2A/H2B/H3; Histone H2A/H2B/H3; Histone H2A/H2B/H3; Histone H2A/H2B/H3; Histone H2A/H2B/H3; Histone H2A/H2B/H3
jgi|Mereb1|323928|fgenesh1_kg.4_#_745_#_Locus24v1rpkm3746.98; jgi|Mereb1|324004|fgenesh1_kg.4_#_821_#_Locus209v1rpkm478.77	PF01384; PF01384	Phosphate transporter family; Phosphate transporter family	IPR001204; IPR001204	Phosphate transporter; Phosphate transporter
jgi|Mereb1|324053|fgenesh1_kg.5_#_5_#_Locus5041v3rpkm30.31; jgi|Mereb1|325514|fgenesh1_kg.7_#_383_#_Locus5041v3rpkm30.31
jgi|Mereb1|324055|fgenesh1_kg.5_#_7_#_Locus5041v1rpkm31.55; jgi|Mereb1|329188|fgenesh1_kg.18_#_26_#_Locus5041v1rpkm31.55; jgi|Mereb1|325512|fgenesh1_kg.7_#_381_#_Locus5041v1rpkm31.55
jgi|Mereb1|324216|fgenesh1_kg.5_#_168_#_Locus9130v1rpkm5.04; jgi|Mereb1|379271|estExt_Genemark1.C_5_t10212
jgi|Mereb1|324610|fgenesh1_kg.5_#_562_#_Locus7347v1rpkm14.30; jgi|Mereb1|379576|estExt_Genemark1.C_5_t20041	PF01966; PF01966	HD domain; HD domain	IPR006674; IPR006674	HD domain; HD domain
jgi|Mereb1|327043|fgenesh1_kg.11_#_125_#_Locus6584v1rpkm19.49; jgi|Mereb1|327058|fgenesh1_kg.11_#_140_#_Locus6584v1rpkm19.49	PF13460; PF13460	NAD(P)H-binding; NAD(P)H-binding	IPR016040; IPR016040	NAD(P)-binding domain; NAD(P)-binding domain
jgi|Mereb1|327045|fgenesh1_kg.11_#_127_#_Locus5745v2rpkm3.08; jgi|Mereb1|327057|fgenesh1_kg.11_#_139_#_Locus5745v1rpkm25.76	PF13460; PF13460	NAD(P)H-binding; NAD(P)H-binding	IPR016040; IPR016040	NAD(P)-binding domain; NAD(P)-binding domain
jgi|Mereb1|327803|fgenesh1_kg.13_#_146_#_Locus2489v1rpkm66.38; jgi|Mereb1|327804|fgenesh1_kg.13_#_147_#_Locus2489v1rpkm66.38	PF01569; PF01569	PAP2 superfamily; PAP2 superfamily	IPR000326; IPR000326	Phosphatidic acid phosphatase type 2/haloperoxidase; Phosphatidic acid phosphatase type 2/haloperoxidase
jgi|Mereb1|328836|fgenesh1_kg.16_#_149_#_Locus7407v1rpkm13.85; jgi|Mereb1|329189|fgenesh1_kg.18_#_27_#_Locus5076v1rpkm31.20
jgi|Mereb1|329469|fgenesh1_kg.19_#_97_#_Locus448v1rpkm267.58; jgi|Mereb1|381934|estExt_Genemark1.C_120040	PF00012; PF00012	Hsp70 protein; Hsp70 protein	IPR013126; IPR013126	Heat shock protein 70 family; Heat shock protein 70 family
jgi|Mereb1|329732|fgenesh1_kg.20_#_150_#_Locus1327v1rpkm115.83; jgi|Mereb1|330415|fgenesh1_kg.28_#_51_#_Locus1327v1rpkm115.83
jgi|Mereb1|329735|fgenesh1_kg.20_#_153_#_Locus5714v3rpkm1.32_PRE; jgi|Mereb1|330412|fgenesh1_kg.28_#_48_#_Locus5714v3rpkm1.32_PRE
jgi|Mereb1|329737|fgenesh1_kg.20_#_155_#_Locus2052v1rpkm79.48; jgi|Mereb1|330409|fgenesh1_kg.28_#_45_#_Locus2052v1rpkm79.48	PF08920, PF13513; PF08920, PF13513	Splicing factor 3B subunit 1, HEAT-like repeat; Splicing factor 3B subunit 1, HEAT-like repeat	IPR015016, -; IPR015016, -	Splicing factor 3B subunit 1, -; Splicing factor 3B subunit 1, -
jgi|Mereb1|329740|fgenesh1_kg.20_#_158_#_Locus7228v1rpkm15.17; jgi|Mereb1|330406|fgenesh1_kg.28_#_42_#_Locus7228v1rpkm15.17	PF13230; PF13230	Glutamine amidotransferases class-II; Glutamine amidotransferases class-II	IPR026869; IPR026869	Gamma-glutamyl-hercynylcysteine sulfoxide hydrolase EgtC-like; Gamma-glutamyl-hercynylcysteine sulfoxide hydrolase EgtC-like
jgi|Mereb1|329742|fgenesh1_kg.20_#_160_#_Locus6081v1rpkm23.26; jgi|Mereb1|330405|fgenesh1_kg.28_#_41_#_Locus6081v1rpkm23.26	PF15159; PF15159	Phosphatidylinositol N-acetylglucosaminyltransferase subunit Y; Phosphatidylinositol N-acetylglucosaminyltransferase subunit Y	IPR029164; IPR029164	Phosphatidylinositol N-acetylglucosaminyltransferase subunit Y; Phosphatidylinositol N-acetylglucosaminyltransferase subunit Y
jgi|Mereb1|329743|fgenesh1_kg.20_#_161_#_Locus2066v1rpkm78.97; jgi|Mereb1|330404|fgenesh1_kg.28_#_40_#_Locus2066v1rpkm78.97	PF00076; PF00076	RNA recognition motif; RNA recognition motif	IPR000504; IPR000504	RNA recognition motif domain; RNA recognition motif domain
jgi|Mereb1|329745|fgenesh1_kg.20_#_163_#_Locus6738v1rpkm18.50; jgi|Mereb1|330401|fgenesh1_kg.28_#_37_#_Locus6738v1rpkm18.50	PF00271, PF16124, PF00270; PF00271, PF16124, PF00270	Helicase conserved C-terminal domain, RecQ zinc-binding, DEAD/DEAH box helicase; Helicase conserved C-terminal domain, RecQ zinc-binding, DEAD/DEAH box helicase	IPR001650, IPR032284, IPR011545; IPR001650, IPR032284, IPR011545	Helicase, C-terminal domain-like, ATP-dependent DNA helicase RecQ, zinc-binding domain, DEAD/DEAH box helicase domain; Helicase, C-terminal domain-like, ATP-dependent DNA helicase RecQ, zinc-binding domain, DEAD/DEAH box helicase domain
jgi|Mereb1|329747|fgenesh1_kg.20_#_165_#_Locus2521v1rpkm65.76; jgi|Mereb1|330400|fgenesh1_kg.28_#_36_#_Locus2521v1rpkm65.76	PF08617; PF08617	Kinase binding protein CGI-121; Kinase binding protein CGI-121	IPR013926; IPR013926	CGI121/TPRKB; CGI121/TPRKB
jgi|Mereb1|329748|fgenesh1_kg.20_#_166_#_Locus3833v1rpkm44.15; jgi|Mereb1|384655|estExt_Genemark1.C_280037	PF08662; PF08662	Eukaryotic translation initiation factor eIF2A; Eukaryotic translation initiation factor eIF2A	IPR013979; IPR013979	Translation initiation factor, beta propellor-like domain; Translation initiation factor, beta propellor-like domain
jgi|Mereb1|329752|fgenesh1_kg.20_#_170_#_Locus4216v3rpkm2.34_PRE; jgi|Mereb1|330396|fgenesh1_kg.28_#_32_#_Locus4216v3rpkm2.34_PRE
jgi|Mereb1|329764|fgenesh1_kg.20_#_182_#_Locus3210v2rpkm12.97; jgi|Mereb1|330383|fgenesh1_kg.28_#_19_#_Locus3210v2rpkm12.97	PF15341; PF15341	Ribosome biogenesis protein SLX9; Ribosome biogenesis protein SLX9	IPR028160; IPR028160	Ribosome biogenesis protein Slx9-like; Ribosome biogenesis protein Slx9-like
jgi|Mereb1|330059|fgenesh1_kg.23_#_33_#_Locus12720v1rpkm1.06; jgi|Mereb1|384343|estExt_Genemark1.C_230031
jgi|Mereb1|384060|estExt_Genemark1.C_200160; jgi|Mereb1|330384|fgenesh1_kg.28_#_20_#_Locus3210v1rpkm52.65
jgi|Mereb1|384057|estExt_Genemark1.C_200157; jgi|Mereb1|330386|fgenesh1_kg.28_#_22_#_Locus6760v1rpkm18.39	PF10230; PF10230	Lipid-droplet associated hydrolase; Lipid-droplet associated hydrolase	IPR019363; IPR019363	Lipid droplet-associated hydrolase; Lipid droplet-associated hydrolase
jgi|Mereb1|336937|fgenesh1_pg.18_#_141; jgi|Mereb1|359957|gm1.8879_g
jgi|Mereb1|344282|estExt_fgenesh1_pm.C_200064; jgi|Mereb1|344470|estExt_fgenesh1_pm.C_280002; jgi|Mereb1|337687|fgenesh1_pg.28_#_5	PF14269; PF14269; PF14269	Arylsulfotransferase (ASST); Arylsulfotransferase (ASST); Arylsulfotransferase (ASST)	IPR039535; IPR039535; IPR039535	Arylsulfotransferase-like; Arylsulfotransferase-like; Arylsulfotransferase-like
jgi|Mereb1|384058|estExt_Genemark1.C_200158; jgi|Mereb1|344477|estExt_fgenesh1_pm.C_280010	PF01522; PF01522	Polysaccharide deacetylase; Polysaccharide deacetylase	IPR002509; IPR002509	NodB homology domain; NodB homology domain
jgi|Mereb1|347223|estExt_fgenesh1_pg.C_50276; jgi|Mereb1|379436|estExt_Genemark1.C_5_t10394
jgi|Mereb1|348670|estExt_fgenesh1_pg.C_100232; jgi|Mereb1|349795|estExt_fgenesh1_pg.C_150138; jgi|Mereb1|359088|gm1.8010_g	PF01370; PF01370; PF01370	NAD dependent epimerase/dehydratase family; NAD dependent epimerase/dehydratase family; NAD dependent epimerase/dehydratase family	IPR001509; IPR001509; IPR001509	NAD-dependent epimerase/dehydratase; NAD-dependent epimerase/dehydratase; NAD-dependent epimerase/dehydratase
jgi|Mereb1|353746|gm1.2668_g; jgi|Mereb1|356870|gm1.5792_g
jgi|Mereb1|360319|gm1.9241_g; jgi|Mereb1|361012|gm1.9934_g
jgi|Mereb1|360322|gm1.9244_g; jgi|Mereb1|361008|gm1.9930_g	PF04616; PF04616	Glycosyl hydrolases family 43; Glycosyl hydrolases family 43	IPR006710; IPR006710	Glycoside hydrolase, family 43; Glycoside hydrolase, family 43
jgi|Mereb1|360326|gm1.9248_g; jgi|Mereb1|361004|gm1.9926_g	PF04739, PF16561; PF04739, PF16561	5'-AMP-activated protein kinase beta subunit, interaction domain, Glycogen recognition site of AMP-activated protein kinase; 5'-AMP-activated protein kinase beta subunit, interaction domain, Glycogen recognition site of AMP-activated protein kinase	IPR006828, IPR032640; IPR006828, IPR032640	Association with the SNF1 complex (ASC) domain, AMP-activated protein kinase, glycogen-binding domain; Association with the SNF1 complex (ASC) domain, AMP-activated protein kinase, glycogen-binding domain
jgi|Mereb1|360327|gm1.9249_g; jgi|Mereb1|361003|gm1.9925_g
jgi|Mereb1|384033|estExt_Genemark1.C_200132; jgi|Mereb1|384665|estExt_Genemark1.C_280047
jgi|Mereb1|384035|estExt_Genemark1.C_200134; jgi|Mereb1|384663|estExt_Genemark1.C_280045	PF11815, PF01734; PF11815, PF01734	Domain of unknown function (DUF3336), Patatin-like phospholipase; Domain of unknown function (DUF3336), Patatin-like phospholipase	IPR021771, IPR002641; IPR021771, IPR002641	Triacylglycerol lipase, N-terminal, Patatin-like phospholipase domain; Triacylglycerol lipase, N-terminal, Patatin-like phospholipase domain
