# Supplementary material for: Snow- and ice-ecosystem cleaning capability of the pucciniomycotinous yeast Phenoliferia psychrophenolica
Source: Research Square preprint supplement (doi:10.21203/rs.3.rs-5795686/v1), 2025-02-25
Supplement: Supplementary file 8 [file d7c39b55b76a831e6e423bec.xlsx]

## Sheet:  
Species names in CAZy	Total number of CAZy domains	GT (glycosyltransferase)	GH (glycoside hydrolase)	PL (Polysaccharide lyase)	AA (Auxiliary Activities)	CE (carbohydrate esterase)	CBM (carbohydrate-binding module)
Rhodosporidium toruloides NP11 (JGI:Rhoto1)	233	103	78	4	22	8	18
Rhodosporidium toruloides ATCC26217 v1 (JGI:Rhoto_ATCC26217_1)	233	100	81	4	22	10	16
Rhodosporidium toruloides APA 2687 v1.0 (JGI:Rhoto1_APA2687_1)	237	102	81	4	22	11	17
Rhodosporidium toruloides IFO0559_1 (JGI:Rhoto_IFO0559_1)	243	107	82	4	22	10	18
Rhodosporidium toruloides IFO1236_1 (JGI:Rhoto_IFO1236_1)	237	102	79	4	22	13	17
Rhodosporidium toruloides IFO0880 v4.0 (JGI:Rhoto_IFO0880_4)	242	103	82	4	22	13	18
Rhodotorula toruloides CECT1137 (NCBI :GCA_003234015.1)	224	101	80	4	20	8	11
Rhodotorula sp. JG-1b v1 (JGI:Rhosp1)	213	104	68	3	15	11	12
Rhodotorula sp. J31 v1.0 (JGI:RhodotJ31_1)	219	102	73	4	15	10	15
Rhodotorula graminis strain WP1 v1.1 (JGI:Rhoba1_1)	238	109	79	6	20	12	12
Rhodotorula glutinis v1.0 (JGI:Rhoglu1)	240	107	81	4	21	11	16
Rhodosporidium glutinis ATCC 204091 v1.0 (JGI:Rhoglu91_1)	235	103	80	4	22	11	15
Rhodotorula mucilaginosa ATCC58901 v1.0 (JGI:Rhomuc1)	221	103	72	4	16	11	15
Rhodosporidium diobovatum 08-225 v1.0 (JGI:Rhodia1_1)	242	106	82	6	20	16	12
Sporidiobolus pararoseus UCDFST 68-350 v1.0 (JGI:Spopa1)	225	95	92	5	18	7	8
Sporobolomyces roseus v1 (JGI:Sporo1)	179	75	74	2	16	8	4
Microbotryum lychnidis-dioicae p1A1 Lamole (JGI:Micld1)	248	102	90	4	26	18	8
Microbotryum violaceum p1A1 Lamole (JGI:Micvi1)	246	101	90	4	25	18	8
Microthyrium microscopicum CBS 115976 v1.0 (JGI:Micmi1)	248	102	90	4	25	19	8
Phenoliferia psychrophenolica (LCC-F-001-001)	498	139	224	11	61	51	12
Meredithblackwellia eburnea MCA 4105 v1.0 (JGI:Mereb1)	405	142	162	9	39	28	25
Kriegeriales sp. isolate P6C61 v1.0 (JGI:Krisp1)	504	139	212	15	68	34	36
Slooffia pilatii Y-17178 v1.0 (JGI:Slopil1)	403	137	120	10	40	17	79
Microbotryomycetes incertae sedis isolate P6C30 v1.0 (JGI:Slotsu1)	328	128	105	8	39	13	35
Hyalopycnis blepharistoma ATCC 48560 v1.0 (JGI:Hyabl1)	234	94	78	5	39	6	12
Heterogastridium pycnidioideum ATCC MYA-4631 (JGI:Hetpy1)	225	91	77	5	39	6	7
Leucosporidiella creatinivora UCDFST 62-1032 v1.0 (JGI:Leucr1)	325	116	126	8	37	19	19
Microbotryomycetes sp. P2C70 v1.0 (JGI:ObeP2C70)	316	120	131	6	31	17	11
Pseudohyphozyma borogiensis ATCC 18809 (NCBI :GCA_024364755.1)	296	103	113	5	27	14	34
AVERAGE	273.69	108.138	99.3793	5.51724	27.9655	14.8276	17.8621
