# Supplementary material for: Snow- and ice-ecosystem cleaning capability of the pucciniomycotinous yeast Phenoliferia psychrophenolica
Source: Research Square preprint supplement (doi:10.21203/rs.3.rs-5795686/v1), 2025-02-25
Supplement: Supplementary file 9 [file fa51de2e7f8e6d7fcc80b557.xlsx]

## Sheet:  
Prediction of Phenoliferia psychorphenolica genes involved in phenol catabolism, by comparison with fungi
Activity and reference protein	list homologs in P.psychrophenolica LCC-F-001-001 (locus ID)
Phenol hydrolase, PheA KAJ8292420.1	g1209.t1;g10793.t1;g10933.t1;g3013.t1
Catechol 1,2-dioxygenase, CatA KAJ8293876.1	g5487.t1;g7122.t1;g3403.t1
Muconate cycloisomerase, CatB KAK4331907.1	g4704.t1
carboxymethylenebutenolidase, Cmbl GEM10458.1	g9884.t1;g9885.t1
3-oxoacid CoA-transferase, partial, OxcT KAK4703905.1	g4197.t1;g4549.t1;g531.t1;g9444.t1
thiolase_acetyl_coA_transferase, FadA CDR42801.1	g4109.t1;g6256.t1;g6258.t1;g6676.t1;g8997.t1;g10667.t1;g3290.t1
Prediction of Phenoliferia psychorphenolica genes involved in carotenoid acyl ester catabolism, based on InterPro functional annotations
Intepro domains	Phenoliferia psychrophenolica LCC-F-001-001 (locus ID)
Carotenoid oxygenase	g3619.t1
Carotenoid oxygenase	g11177.t1
Carotenoid oxygenase	g11521.t1
Carotenoid oxygenase	g8523.t1
Carotenoid oxygenase	g2359.t1
GDSL-like Lipase/Acylhydrolase	g8939.t1
Lysophospholipase catalytic domain	g4771.t1
Lipase (class 3)	g759.t1
Lysophospholipase catalytic domain	g5575.t1
GDSL-like Lipase/Acylhydrolase	g3292.t1
GDSL-like Lipase/Acylhydrolase	g10207.t1
GDSL-like Lipase/Acylhydrolase	g383.t1
Lipase (class 3)	g9704.t1
Secretory lipase	g6836.t1
Secretory lipase	g8984.t1
Uncharacterized alpha/beta hydrolase domain (DUF2235)	g3487.t1
Lysophospholipase catalytic domain	g4485.t1
Lipase (class 3)	g2883.t1
Secretory lipase	g5317.t1
Lysophospholipase catalytic domain	g1185.t1
Lysophospholipase catalytic domain	g3712.t1
Lysophospholipase catalytic domain	g3712.t1
Phospholipase/Carboxylesterase	g9346.t1
Phospholipase/Carboxylesterase	g9346.t1
Partial alpha/beta-hydrolase lipase region	g6826.t1
Lipase (class 3)	g6335.t1
Secretory lipase	g6073.t1
Secretory lipase	g5322.t1
Lysophospholipase catalytic domain	g8332.t1
Lysophospholipase catalytic domain	g9071.t1
Lysophospholipase catalytic domain	g9071.t1
Secretory lipase	g7273.t1
Lipase (class 3)	g7303.t1
Lipase (class 3)	g1271.t1
GDSL-like Lipase/Acylhydrolase	g1025.t1
Lipase (class 3)	g8436.t1
Uncharacterized alpha/beta hydrolase domain (DUF2235)	g2751.t1
Uncharacterized alpha/beta hydrolase domain (DUF2235)	g2751.t1
Lipase (class 3)	g4368.t1
GDSL-like Lipase/Acylhydrolase	g6788.t1
GDSL-like Lipase/Acylhydrolase	g9681.t1
Lysophospholipase catalytic domain	g1782.t1
Secretory lipase	g6500.t1
Lipase (class 3)	g6156.t1
Lysophospholipase catalytic domain	g1345.t1
Phospholipase/Carboxylesterase	g7472.t1
Secretory lipase	g1143.t1
Secretory lipase	g7926.t1
GDSL-like Lipase/Acylhydrolase	g6265.t1
Lysophospholipase catalytic domain	g8744.t1
Secretory lipase	g11182.t1
Uncharacterized alpha/beta hydrolase domain (DUF2235)	g10381.t1
Uncharacterized alpha/beta hydrolase domain (DUF2235)	g10381.t1
Secretory lipase	g11181.t1
Phospholipase/Carboxylesterase	g1638.t1
Lysophospholipase catalytic domain	g6586.t1
Lysophospholipase catalytic domain	g6586.t1
Putative serine esterase (DUF676)	g415.t1
Uncharacterized alpha/beta hydrolase domain (DUF2235)	g10183.t1
Lipase (class 3)	g7151.t1
Lipase (class 3)	g5865.t1
Secretory lipase	g1633.t1
Secretory lipase	g1633.t1
Secretory lipase	g11177.t1
GDSL-like Lipase/Acylhydrolase	g2006.t1
PhoD-like phosphatase, N-terminal domain	g3838.t1
Phosphatidylinositol-specific phospholipase C, X domain	g2116.t1
Phosphoinositide-specific phospholipase C, efhand-like	g2116.t1
Phosphatidylinositol-specific phospholipase C, Y domain	g2116.t1
Secretory lipase	g6072.t1
Lysophospholipase catalytic domain	g6585.t1
Secretory lipase	g10943.t1
Phospholipase/Carboxylesterase	g3207.t1
GDSL-like Lipase/Acylhydrolase	g3408.t1
Uncharacterized alpha/beta hydrolase domain (DUF2235)	g10031.t1
Secretory lipase	g11523.t1
Lysophospholipase catalytic domain	g1497.t1
Lysophospholipase catalytic domain	g3970.t1
Lysophospholipase catalytic domain	g3970.t1
Secretory lipase	g7348.t1
Lysophospholipase catalytic domain	g5359.t1
Uncharacterized alpha/beta hydrolase domain (DUF2235)	g6881.t1
Uncharacterized alpha/beta hydrolase domain (DUF2235)	g6881.t1
Secretory lipase	g2468.t1
Uncharacterized alpha/beta hydrolase domain (DUF2235)	g10738.t1
Lipase (class 3)	g10845.t1
Lysophospholipase catalytic domain	g3884.t1
Lysophospholipase catalytic domain	g3884.t1
Lipase (class 3)	g4317.t1
Phospholipase/Carboxylesterase	g7015.t1
GDSL-like Lipase/Acylhydrolase	g7606.t1
Lipase (class 3)	g8927.t1
Secretory lipase	g3602.t1
Lysophospholipase catalytic domain	g1294.t1
Phospholipase/Carboxylesterase	g1295.t1
Lipase (class 3)	g9698.t1
Phospholipase D Active site motif	g4330.t1
PLD-like domain	g4330.t1
GDSL-like Lipase/Acylhydrolase	g527.t1
Lipase (class 3)	g3176.t1
Secretory lipase	g787.t1
Secretory lipase	g787.t1
Secretory lipase	g11178.t1
Secretory lipase	g11178.t1
GDSL-like Lipase/Acylhydrolase	g4656.t1
Secretory lipase	g7430.t1
Lysophospholipase catalytic domain	g1346.t1
Lysophospholipase catalytic domain	g1346.t1
Uncharacterized alpha/beta hydrolase domain (DUF2235)	g7564.t1
Secretory lipase	g6071.t1
Patatin-like phospholipase	g3215.t1
Phospholipase/Carboxylesterase	g1285.t1
Phospholipase/Carboxylesterase	g1285.t1
Phospholipase/Carboxylesterase	g6433.t1
PLD-like domain	g6551.t1
Lysophospholipase catalytic domain	g7457.t1
GDSL-like Lipase/Acylhydrolase	g6891.t1
Putative serine esterase (DUF676)	g4697.t1
Secretory lipase	g778.t1
Lysophospholipase catalytic domain	g8768.t1
Domain of unknown function (DUF3336)	g10416.t1
Patatin-like phospholipase	g10416.t1
Phospholipase/Carboxylesterase	g5492.t1
PLD-like domain	g7494.t1
Phospholipase D Active site motif	g7494.t1
Secretory lipase	g7260.t1
Lipase (class 3)	g7022.t1
Lysophospholipase catalytic domain	g7871.t1
Lipase (class 3)	g7786.t1
GDSL-like Lipase/Acylhydrolase	g8852.t1
Uncharacterized alpha/beta hydrolase domain (DUF2235)	g3989.t1
Lysophospholipase catalytic domain	g9486.t1
Lysophospholipase catalytic domain	g5977.t1
Lysophospholipase catalytic domain	g5977.t1
Secretory lipase	g6094.t1
Secretory lipase	g3623.t1
Uncharacterized alpha/beta hydrolase domain (DUF2235)	g5156.t1
GDSL-like Lipase/Acylhydrolase	g1732.t1
Lysophospholipase catalytic domain	g7439.t1
Lysophospholipase catalytic domain	g7439.t1
Lipase (class 3)	g7029.t1
GDSL-like Lipase/Acylhydrolase	g5253.t1
PLD-like domain	g6716.t1
Lipase (class 3)	g4871.t1
