# Supplementary material for: Snow- and ice-ecosystem cleaning capability of the pucciniomycotinous yeast Phenoliferia psychrophenolica
Source: Research Square preprint supplement (doi:10.21203/rs.3.rs-5795686/v1), 2025-02-25
Supplement: Supplementary file 10 [file ff8e7bcc3f4866ee3176e0a2.xlsx]

## Sheet: Feuil1
Sample name	Color of the bloom	Snow/Ice microbial community	Location	Longitude	Latitude	Sequencing technology	nb reads mapped	nb paired reads mapped	nb nucleotides mapped	nb nucleotides mapped confidently	Coverage	Depth	Mapping plots on P. psychrophenolica ITS2
Ancylonema bloom 2	dark	Glacier ice	"surface ice of Morteratsch glacier", Switzerland, Bowles and al. , SRR28860551	46.401257	9.92727	Illumina Novaseq 6000	311	11	77564	20755	100	89.4569
Ancylonema	dark	Glacier ice	Morteratsch glacier, Swiss Alps	46.4141	9.93387	Illumina MiSeq, mate-paired	0	0	0	0	0	0	X
bloo1	red	Melting snowfield	Vallon de roche noire, French Alps	45.0535	6.38842	Illumina Novaseq	599	298	89850	42046	100	181.116
blo10	red	Melting snowfield	Vallon de roche noire, French Alps	45.054	6.38616	Illumina Novaseq	1712	791	256800	54913	100	236.668
blo11	red	Melting snowfield	Vallon de roche noire, French Alps	45.0551	6.38119	Illumina Novaseq	1917	653	242550	95431	100	411.263
blo12	red	Melting snowfield	Vallon de roche noire, French Alps	45.055	6.3817	Illumina Novaseq	2068	1001	310200	132477	100	570.94
blo13	red	Melting snowfield	Vallon de roche noire, French Alps	45.0548	6.3822	Illumina Novaseq	6024	3610	903600	207633	100	894.793
blo14	red	Melting snowfield	Vallon de roche noire, French Alps	45.0547	6.3831	Illumina Novaseq	1941	1030	291150	117115	100	504.707
blo16	red	Melting snowfield	Galibier	45.0595	6.40156	Illumina Novaseq	348	161	52200	19667	100	84.7155
blo17	red	Melting snowfield	Brevent	45.9355	6.83677	Illumina Novaseq	3952	2253	592800	187110	100	806.448
blo18	red	Melting snowfield	Brevent	45.9359	6.83655	Illumina Novaseq	2512	1284	376800	159005	100	685.328
blo19	red	Melting snowfield	Brevent	45.9361	6.83656	Illumina Novaseq	2656	1446	398400	197662	100	851.905
blo20	red	Melting snowfield	Brevent	45.934	6.83654	Illumina Novaseq	1090	517	163500	45286	100	195.159
blo23	red	Melting snowfield	Storfjord	69.3918	19.952	Illumina Novaseq	345	151	51750	12393	100	53.3922
blo24	red	Melting snowfield	Phippsøya	~80.72	~20.74	Illumina Novaseq	1548	948	232200	113100	100	487.47
blo26	red	Melting snowfield	Saint-sorlin	45.1688	6.16282	Illumina Novaseq	525	270	78750	35366	100	152.379
RQ	red	Melting snowfield	Vallon de roche noire	45.0487	6.39466	Illumina Miseq	534	243	158464	70444	100	303.603
RQ	red	Melting snowfield	Vallon de roche noire	45.0487	6.39466	Illumina Novaseq	391	41	59010	38264	100	164.922
OAA3	red	Melting snowfield	Mont olympe	40.0755	22.3598	Illumina Novaseq	128	10	19258	10371	100	44.6681
Trondheim	red	Melting snowfield	Trondheim	~63.21	~10.47	Illumina Novaseq	415	37	62428	29622	100	127.664
